# Supplementary material for: A novel immune classification reveals distinct immune escape mechanism and genomic alterations: implications for immunotherapy in hepatocellular carcinoma
Source: J Transl Med. 2021 Jan 6;19:5. doi: 10.1186/s12967-020-02697-y (PMC7789239; doi:10.1186/s12967-020-02697-y)
Supplement: Supplementary file 2 — Additional file 2: Table S1. Basic information of datasets included in this study for identifying distinct TIME phenotypes. Table S2. The specific Hallmark pathways of each TIME phenotype in the GEO cohort. Table S3. The specific KEGG pathways of each TIME phenotype in the GEO cohort. Table S4. The specific Hallmark pathways of each TIME phenotype in the TCGA cohort. Table S5. The specific KEGG pathways of each TIME phenotype in the TCGA cohort. Table S6. The difference of chemokines, ILs, IFNs, and other important cytokines and their receptors among three TIME phenotypes in the expression, CNV and mutation level. Table S7. The significant focal copy number alterations (including amplification and deletion) of each TIME phenotype. Table S8. The epigenetically silenced genes (ESGs) in three TIME phenotypes. Table S9. Ninety-eight phenotype-related differentially expressed genes (DEGs). Table S10. GO enrichment analysis of 98 phenotype-related DEGs. Table S11. KEGG enrichment analysis of 98 phenotype-related DEGs. Table S12. Multivariate COX regression analysis of TI in HCC and pancancer. [file 12967_2020_2697_MOESM2_ESM.xlsx]

## Sheet: S1
Supplementary Table-S1: Basic information of datasets included in this study for identifying distinct TIME phenotypes.
Accession number	Platform	Number of patients	Protein coding gene	PMID
GSE102079	Affymetrix Human Genome U133 Plus 2.0 Array	152	16324	29454748
GSE107170	Affymetrix Human Genome U133 Plus 2.0 Array	65	16324	29858376
GSE112790	Affymetrix Human Genome U133 Plus 2.0 Array	183	16324	30598371
GSE116174	Affymetrix HT HG-U133 + PM Array Plate	64	15611	31392826
GSE121248	Affymetrix Human Genome U133 Plus 2.0 Array	70	16324	17975138
GSE14323	Affymetrix Human Genome U133A Array Affymetrix Human Genome U133A 2.0 Array	64	12610	19098997
GSE14520	Affymetrix Human Genome U133A Array Affymetrix Human Genome U133A 2.0 Array	247	12610	21159642
GSE25097	Affymetrix 1.0 microarray	268	15523	22634754
GSE45436	Affymetrix Human Genome U133 Plus 2.0 Array	95	16324	24160375
GSE62232	Affymetrix Human Genome U133 Plus 2.0 Array	81	16324	25822088
GSE63898	Affymetrix Human Genome U219 Array	228	16377	25645722
GSE64041	Affymetrix Human Gene 1.0 ST Array	60	17502	27499918
GSE76297	Affymetrix Human Transcriptome Array 2.0	153	17666	28648284
GSE9843	Affymetrix Human Genome U133 Plus 2.0 Array	91	16324	18701503
TCGA-LIHC	Illumina RNAseq	374	19144

## Sheet: S2
Supplementary Table-S2: The specific Hallmark pathways of each TIME phenotype in the GEO cohort.
Hallmark-TIME-1								Hallmark-TIME-2								Hallmark-TIME-3
Term	logFC	AveExpr	t	P.Value	adj.P.Val	B		Term	logFC	AveExpr	t	P.Value	adj.P.Val	B		Term	logFC	AveExpr	t	P.Value	adj.P.Val	B
Myc targets v1	0.276089	-0.0094833	17.9242	2.61061e-66	4.35101e-65	139.818		Bile acid metabolism	0.287146	0.0181436	12.8427	3.31308e-36	2.12394e-35	71.0571		Allograft rejection	0.483042	-0.00389967	47.7301	1.97626258336499e-323	9.88131291682493e-322	730.77
E2f targets	0.273031	-0.0183472	15.7648	1.35514e-52	8.46964e-52	108.364		Kras signaling dn	0.265215	0.0102508	16.726	1.53199e-58	7.65996e-57	122.186		Interferon gamma response	0.425697	0.00326367	34.7393	1.9457e-203	2.43213e-202	454.517
Myc targets v2	0.269259	-0.0175201	13.2784	1.76483e-38	5.19067e-38	76.0318		Fatty acid metabolism	0.259701	0.013482	7.06156	2.33091e-12	3.32987e-12	16.7657		Inflammatory response	0.364541	0.00214716	38.6798	1.35945e-239	3.39862e-238	537.723
G2m checkpoint	0.234415	-0.0192404	14.9146	1.48039e-47	6.72905e-47	96.8174		Xenobiotic metabolism	0.243754	0.017536	9.99479	6.16234e-23	1.62167e-22	40.7695		Interferon alpha response	0.352469	0.000677057	22.1318	2.40527e-96	1.20263e-95	208.18
Dna repair	0.220573	-0.0090514	17.8842	4.80873e-66	6.01091e-65	139.21		Peroxisome	0.210569	0.00699518	9.40888	1.45142e-20	3.2969e-20	35.3702		Il6 jak stat3 signaling	0.344925	0.00338574	33.428	1.45275e-191	1.45275e-190	427.196
Protein secretion	0.15119	-0.00387983	13.6619	1.56668e-40	5.22228e-40	80.7283		Pancreas beta cells	0.1372	0.0123576	12.5654	8.59612e-35	4.29806e-34	67.8248		Tnfa signaling via nfkb	0.316408	-0.000721376	25.5171	4.31084e-123	2.39491e-122	269.676
Unfolded protein response	0.148634	-0.00555653	14.3381	2.90708e-44	1.11811e-43	89.2733		Myogenesis	0.07521	0.00655397	8.04008	1.59729e-15	2.66216e-15	23.9217		Complement	0.280232	0.00437664	32.2521	5.19007e-181	4.32506e-180	402.913
Mitotic spindle	0.147212	-0.0126234	13.4176	3.21793e-39	1.0056e-38	77.7236		Adipogenesis	0.0560575	0.0105158	4.80038	1.71253e-06	2.03873e-06	3.63158		Il2 stat5 signaling	0.273884	0.00176244	35.6356	1.3187e-211	2.19784e-210	473.315
Mtorc1 signaling	0.134155	-0.00327897	12.0354	3.67917e-32	1.02199e-31	61.5774		Spermatogenesis	0.0522865	0.00155621	5.79295	8.12666e-09	1.04188e-08	8.80294		Kras signaling up	0.268962	0.00801634	31.1141	6.7529e-171	4.8235e-170	379.642
Oxidative phosphorylation	0.110461	0.0104878	7.32672	3.52256e-13	6.29029e-13	18.3516		Coagulation	0.051941	0.0104311	4.1141	4.05977e-05	4.72066e-05	0.60908		Epithelial mesenchymal transition	0.26619	-0.00305423	19.094	3.00846e-74	1.25352e-73	157.403
Cholesterol homeostasis	0.0912031	-0.000300559	7.47783	1.16665e-13	2.16046e-13	19.4371		Heme metabolism	0.0300922	0.00152257	4.8056	1.66901e-06	2.03538e-06	3.6563		Angiogenesis	0.234182	-0.00160718	16.3092	6.25772e-56	2.40682e-55	115.345
Glycolysis	0.0713082	-0.000569699	9.87962	1.84461e-22	3.84294e-22	39.4336		Oxidative phosphorylation	0.0161163	0.0104878	0.978837	0.32779	0.32779	-7.32726		Apoptosis	0.221257	0.00255677	25.594	1.0113e-123	6.32062e-123	271.124
Spermatogenesis	0.0513736	0.00155621	6.13463	1.04392e-09	1.68374e-09	10.5267		Hedgehog signaling	0.0108988	0.000225971	1.00016	0.317364	0.323841	-7.3062		Apical surface	0.199568	0.00419696	21.3928	8.69075e-91	3.95034e-90	195.405
Peroxisome	0.0394301	0.00699518	3.70482	0.000217834	0.000286624	-1.25726		Estrogen response late	-0.00816885	0.00421283	-1.42322	0.154843	0.161295	-6.79456		Tgf beta signaling	0.168643	-0.00432618	12.4109	5.14431e-34	1.28608e-33	65.1104
Wnt beta catenin signaling	0.0380565	-0.00804351	3.33197	0.000879546	0.00109943	-2.55975		Estrogen response early	-0.018467	0.00491035	-2.61048	0.0091154	0.0101282	-4.4084		Uv response dn	0.129247	0.00230063	12.7383	1.13651e-35	3.15698e-35	68.9005
Pi3k akt mtor signaling	0.0291322	-0.00274087	3.74503	0.00018596	0.000251297	-1.10865		Cholesterol homeostasis	-0.0193542	-0.000300559	-1.45267	0.146488	0.155838	-6.75231		Hypoxia	0.122185	0.000974893	13.589	3.88138e-40	1.21293e-39	79.1303
Reactive oxygen species pathway	0.0236348	0.00606745	2.12269	0.0339141	0.039435	-5.8426		Reactive oxygen species pathway	-0.0230193	0.00606745	-1.91979	0.0550399	0.059826	-5.96673		Coagulation	0.121283	0.0104311	10.0279	4.48913e-23	1.06884e-22	40.1061
Uv response up	0.0164269	0.00179545	2.46845	0.0136608	0.0162628	-5.05146		Apical junction	-0.0259143	-0.000256393	-3.2431	0.0012037	0.00136784	-2.5676		Apical junction	0.114898	-0.000256393	15.5853	1.6353e-51	5.84035e-51	105.21
Androgen response	0.0152569	0.00277029	1.72675	0.0843818	0.0958884	-6.60283		Glycolysis	-0.038911	-0.000569699	-4.91092	9.87279e-07	1.2341e-06	4.16091		P53 pathway	0.114187	-0.00100705	14.6784	3.40427e-46	1.13476e-45	93.0127
Tgf beta signaling	0.00491892	-0.00432618	0.366628	0.713939	0.728509	-8.02471		Uv response up	-0.0465727	0.00179545	-6.56596	6.7185e-11	9.07905e-11	13.4763		Notch signaling	0.103127	-0.00652217	8.32775	1.5953e-16	3.06789e-16	25.1909
Adipogenesis	0.0047003	0.0105158	0.430667	0.666761	0.70932	-7.99919		Hypoxia	-0.0655486	0.000974893	-6.89179	7.55887e-12	1.04984e-11	15.6133		Pi3k akt mtor signaling	0.0769379	-0.00274087	9.57725	3.11299e-21	6.76738e-21	35.9083
Estrogen response late	0.00358908	0.00421283	0.672866	0.501117	0.556797	-7.86563		P53 pathway	-0.0722089	-0.00100705	-8.77624	3.80115e-18	7.30991e-18	29.8736		Hedgehog signaling	0.0669162	0.000225971	6.33668	2.94971e-10	4.46926e-10	11.0118
Heme metabolism	0.00237947	0.00152257	0.406534	0.684398	0.712914	-8.00929		Androgen response	-0.0734455	0.00277029	-7.84336	7.40108e-15	1.19372e-14	22.4133		Wnt beta catenin signaling	0.0663741	-0.00804351	5.54002	3.46402e-08	4.81114e-08	6.36939
Fatty acid metabolism	0.000815271	0.013482	0.063041	0.949741	0.949741	-8.0899		Apical surface	-0.0782767	0.00419696	-7.45987	1.33192e-13	2.01806e-13	19.5734		Myogenesis	0.0626051	0.00655397	6.8004	1.4087e-11	2.34783e-11	13.9884
Notch signaling	-0.00718217	-0.00652217	-0.600383	0.548325	0.596006	-7.91174		Uv response dn	-0.0879098	0.00230063	-8.28358	2.28301e-16	4.07681e-16	25.837		Androgen response	0.0535058	0.00277029	5.79107	8.21664e-09	1.20833e-08	7.76758
Estrogen response early	-0.0238224	0.00491035	-3.63169	0.000289339	0.000370948	-1.52346		Dna repair	-0.0949479	-0.0090514	-8.20448	4.31957e-16	7.44754e-16	25.209		Estrogen response early	0.0442161	0.00491035	6.44375	1.48714e-10	2.39861e-10	11.6813
Uv response dn	-0.0403628	0.00230063	-4.03789	5.61639e-05	7.80054e-05	0.0211857		Myc targets v2	-0.0988252	-0.0175201	-6.21455	6.36072e-10	8.36937e-10	11.2823		Uv response up	0.0264186	0.00179545	3.77444	0.000165492	0.000192433	-1.75628
P53 pathway	-0.0403681	-0.00100705	-5.21257	2.07339e-07	3.0491e-07	5.38843		Kras signaling up	-0.0989005	0.00801634	-9.26946	5.09956e-20	1.01991e-19	34.129		Estrogen response late	0.00384657	0.00421283	0.684343	0.493845	0.503924	-8.62007
Bile acid metabolism	-0.0410071	0.0181436	-2.90834	0.00367744	0.00448468	-3.87401		Notch signaling	-0.0991492	-0.00652217	-7.82533	8.50323e-15	1.32863e-14	22.2768		Reactive oxygen species pathway	-0.00419911	0.00606745	-0.357202	0.720982	0.720982	-8.79046
Pancreas beta cells	-0.044404	0.0123576	-4.22106	2.55091e-05	3.64416e-05	0.770298		Complement	-0.103588	0.00437664	-9.55011	3.99594e-21	9.51414e-21	36.6447		Mitotic spindle	-0.00883221	-0.0126234	-0.728431	0.466443	0.485878	-8.58892
Hypoxia	-0.0533047	0.000974893	-6.0157	2.15857e-09	3.37277e-09	9.81871		Epithelial mesenchymal transition	-0.110783	-0.00305423	-7.20702	8.33189e-13	1.22528e-12	17.7742		Mtorc1 signaling	-0.0147049	-0.00327897	-1.20464	0.2285	0.243085	-8.12874
Hedgehog signaling	-0.0695665	0.000225971	-6.96198	4.66182e-12	8.03762e-12	15.8176		Wnt beta catenin signaling	-0.113284	-0.00804351	-9.40404	1.51657e-20	3.2969e-20	35.3268		Unfolded protein response	-0.0241427	-0.00555653	-2.09636	0.0361873	0.039334	-6.65879
Xenobiotic metabolism	-0.0731304	0.017536	-5.37246	8.7622e-08	1.32761e-07	6.22152		Pi3k akt mtor signaling	-0.113948	-0.00274087	-14.2919	5.28399e-44	1.321e-42	88.8927		Heme metabolism	-0.0315216	0.00152257	-5.14658	2.9383e-07	3.58329e-07	4.29879
Apoptosis	-0.0804858	0.00255677	-8.59065	1.82267e-17	3.50513e-17	28.0678		Il2 stat5 signaling	-0.124717	0.00176244	-12.7363	1.16343e-35	6.46348e-35	69.8101		Protein secretion	-0.0338758	-0.00387983	-2.77074	0.00564963	0.00627736	-5.02251
Apical junction	-0.0809471	-0.000256393	-11.2452	2.0499e-28	5.12476e-28	53.018		Inflammatory response	-0.124932	0.00214716	-9.88025	1.83393e-22	4.58483e-22	39.6909		Glycolysis	-0.0419741	-0.000569699	-5.41751	6.84505e-08	8.7757e-08	5.70878
Angiogenesis	-0.0976193	-0.00160718	-6.78244	1.59053e-11	2.65089e-11	14.6153		Angiogenesis	-0.1309	-0.00160718	-8.50638	3.67758e-17	6.81034e-17	27.6359		Xenobiotic metabolism	-0.056602	0.017536	-3.92863	8.86095e-05	0.000105488	-1.16696
Kras signaling dn	-0.102918	0.0102508	-9.54794	4.07566e-21	8.15133e-21	36.3713		Apoptosis	-0.13729	0.00255677	-14.0459	1.24009e-42	2.06682e-41	85.7565		Adipogenesis	-0.059018	0.0105158	-5.16505	2.6662e-07	3.33275e-07	4.3927
Apical surface	-0.111898	0.00419696	-11.7284	1.11315e-30	2.92933e-30	58.1928		Protein secretion	-0.139943	-0.00387983	-11.5918	4.95987e-30	1.65329e-29	56.9486		Kras signaling dn	-0.0632554	0.0102508	-5.47545	4.96854e-08	6.71424e-08	6.01944
Myogenesis	-0.121173	0.00655397	-14.47	5.22991e-45	2.17913e-44	90.9797		Mtorc1 signaling	-0.140176	-0.00327897	-11.6535	2.53133e-30	9.42107e-30	57.6156		G2m checkpoint	-0.0647731	-0.0192404	-3.70325	0.000219175	0.000249063	-2.02049
Il2 stat5 signaling	-0.13865	0.00176244	-15.5457	2.8228e-51	1.4114e-50	105.342		Il6 jak stat3 signaling	-0.141006	0.00338574	-10.879	9.41498e-27	2.76911e-26	49.4673		Pancreas beta cells	-0.0822637	0.0123576	-7.4925	1.04688e-13	1.93867e-13	18.8013
Epithelial mesenchymal transition	-0.143754	-0.00305423	-10.208	7.85734e-24	1.70812e-23	42.5579		Unfolded protein response	-0.147124	-0.00555653	-13.0687	2.2322e-37	1.86017e-36	73.7355		Cholesterol homeostasis	-0.0828677	-0.000300559	-6.41757	1.75989e-10	2.74983e-10	11.5166
Tnfa signaling via nfkb	-0.144592	-0.000721376	-10.8962	7.88332e-27	1.87698e-26	49.399		Mitotic spindle	-0.161431	-0.0126234	-13.6913	1.08594e-40	1.35743e-39	81.3125		Fatty acid metabolism	-0.0939919	0.013482	-6.98316	4.02623e-12	6.94178e-12	15.2164
Coagulation	-0.153855	0.0104311	-13.7163	7.9419e-41	2.83639e-40	81.4038		Tnfa signaling via nfkb	-0.162147	-0.000721376	-11.3805	4.85125e-29	1.51602e-28	54.6878		Myc targets v1	-0.0948681	-0.0094833	-5.42871	6.43559e-08	8.46788e-08	5.76857
Kras signaling up	-0.156497	0.00801634	-16.5497	1.97108e-57	1.64257e-56	119.455		Interferon alpha response	-0.166003	0.000677057	-9.27779	4.73314e-20	9.86071e-20	34.2026		Spermatogenesis	-0.107311	0.00155621	-12.5373	1.19266e-34	3.13859e-34	66.5634
Complement	-0.162586	0.00437664	-16.9421	6.48721e-60	6.48721e-59	125.148		Allograft rejection	-0.174091	-0.00389967	-11.6497	2.6379e-30	9.42107e-30	57.5747		Dna repair	-0.109731	-0.0090514	-9.75169	6.15628e-22	1.39915e-21	37.5128
Interferon alpha response	-0.173686	0.000677057	-10.5183	3.66714e-25	8.33441e-25	45.5935		Tgf beta signaling	-0.181453	-0.00432618	-13.1414	9.29971e-38	9.29971e-37	74.605		E2f targets	-0.1107	-0.0183472	-5.73703	1.12548e-08	1.60783e-08	7.46156
Il6 jak stat3 signaling	-0.18847	0.00338574	-16.2288	1.96609e-55	1.40435e-54	114.872		Interferon gamma response	-0.189954	0.00326367	-12.2571	2.99644e-33	1.36202e-32	64.3004		Myc targets v2	-0.115672	-0.0175201	-7.4598	1.33264e-13	2.37972e-13	18.564
Interferon gamma response	-0.218863	0.00326367	-15.5538	2.52306e-51	1.4017e-50	105.453		E2f targets	-0.201107	-0.0183472	-10.4147	1.02973e-24	2.86037e-24	44.8183		Bile acid metabolism	-0.133968	0.0181436	-9.19424	9.97807e-20	2.07876e-19	32.4778
Inflammatory response	-0.219973	0.00214716	-20.1809	6.3697e-82	1.59243e-80	175.65		G2m checkpoint	-0.20421	-0.0192404	-11.8216	3.9895e-31	1.66229e-30	59.4479		Oxidative phosphorylation	-0.138322	0.0104878	-8.7524	4.65724e-18	9.31448e-18	28.6794
Allograft rejection	-0.284106	-0.00389967	-22.2684	2.18444e-97	1.09222e-95	211.159		Myc targets v1	-0.221152	-0.0094833	-12.8405	3.3983e-36	2.12394e-35	71.0318		Peroxisome	-0.145268	0.00699518	-13.5258	8.48302e-40	2.495e-39	78.3523

## Sheet: S3
Supplementary Table-S3: The specific KEGG pathways of each TIME phenotype in the GEO cohort.
KEGG-TIME-1								KEGG-TIME-2								KEGG-TIME-3
Term	logFC	AveExpr	t	P.Value	adj.P.Val	B		Term	logFC	AveExpr	t	P.Value	adj.P.Val	B		Term	logFC	AveExpr	t	P.Value	adj.P.Val	B
Aminoacyl trna biosynthesis	0.294577	-0.00236756	15.0075	4.28826e-48	2.65872e-47	98.2733		Primary bile acid biosynthesis	0.27064	0.0246732	12.8793	2.15037e-36	1.99985e-35	71.7499		Graft versus host disease	0.51951	-0.0021657	35.425	1.1985e-209	5.57304e-208	469.126
Dna replication	0.282758	-0.0175088	15.7748	1.18493e-52	8.47682e-52	108.712		Fatty acid metabolism	0.253073	0.0173152	10.0072	5.47561e-23	1.95858e-22	41.2374		Allograft rejection	0.456332	-0.00221867	31.7794	9.03761e-177	2.10124e-175	393.546
Mismatch repair	0.274846	-0.0109856	16.9516	5.68372e-60	5.56406e-59	125.478		Taurine and hypotaurine metabolism	0.246635	0.012012	11.7396	9.86888e-31	6.11871e-30	58.8506		Primary immunodeficiency	0.431163	-0.00732149	38.6298	4.3752e-239	4.06893e-237	536.802
Spliceosome	0.244989	-0.0101338	17.8579	7.25547e-66	7.93834e-65	138.986		Glycine serine and threonine metabolism	0.242534	0.0108771	13.4245	2.9646e-39	4.37481e-38	78.272		Type i diabetes mellitus	0.395486	0.00191052	30.6381	1.1247e-166	1.74329e-165	370.34
Rna polymerase	0.212752	-0.00939289	15.2022	3.10449e-49	2.06227e-48	100.884		Tryptophan metabolism	0.23493	0.0184973	10.7329	4.2068e-26	1.86301e-25	48.3155		Intestinal immune network for iga production	0.374871	0.00106914	30.9955	7.98026e-170	1.34939e-168	377.579
Nucleotide excision repair	0.203069	-0.00900269	16.786	6.42214e-59	5.97259e-58	123.065		Retinol metabolism	0.228502	0.0220241	13.1025	1.48922e-37	1.73122e-36	74.3934		Leishmania infection	0.37161	-0.00169564	33.2866	2.92445e-190	9.0658e-189	424.556
Homologous recombination	0.195195	-0.0189185	13.7896	3.18053e-41	1.64327e-40	82.5507		Tyrosine metabolism	0.227404	0.0130842	16.2183	2.29719e-55	2.13639e-53	115.044		Systemic lupus erythematosus	0.316477	0.00603061	24.5324	4.24231e-115	3.58668e-114	251.806
Base excision repair	0.194665	-0.0113058	14.7597	1.16583e-46	6.77641e-46	94.9897		Maturity onset diabetes of the young	0.217531	0.0133044	15.2616	1.38648e-49	5.15771e-48	101.844		Nod like receptor signaling pathway	0.305579	-0.000985649	31.0044	6.66137e-170	1.23901e-168	377.759
Glycosylphosphatidylinositol gpi anchor biosynthesis	0.190471	-0.00632663	14.2323	1.14378e-43	6.25712e-43	88.1428		Steroid hormone biosynthesis	0.212718	0.0223844	14.5675	1.46893e-45	3.41527e-44	92.6562		Asthma	0.297884	0.00655789	19.9865	1.59729e-80	1.18839e-79	172.39
Rna degradation	0.186966	-0.00909218	15.669	5.15961e-52	3.5544e-51	107.248		Phenylalanine metabolism	0.212555	0.0154554	13.2962	1.42459e-38	1.89268e-37	76.7174		Hematopoietic cell lineage	0.293538	0.00409914	29.4693	1.84499e-156	2.28778e-155	346.861
Basal transcription factors	0.17583	-0.00721122	14.9913	5.32535e-48	3.19521e-47	98.0579		Drug metabolism cytochrome p450	0.188435	0.0221926	11.6379	3.00617e-30	1.69439e-29	57.7492		Natural killer cell mediated cytotoxicity	0.293254	-0.0022629	37.9839	3.99089e-233	2.47435e-231	523.1
Proteasome	0.174413	0.00564972	9.58289	2.95698e-21	9.322e-21	36.9647		Neuroactive ligand receptor interaction	0.181892	0.0128214	14.1893	1.98852e-43	4.1096e-42	87.7921		B cell receptor signaling pathway	0.286548	-0.00264453	32.1271	7.21995e-180	1.91844e-178	400.666
Cell cycle	0.173673	-0.0163342	14.056	1.09367e-42	5.81206e-42	85.8991		Peroxisome	0.178944	0.0169236	10.7553	3.34871e-26	1.51917e-25	48.5408		Antigen processing and presentation	0.280678	-0.00334504	26.7458	3.06518e-133	3.35367e-132	293.492
Non homologous end joining	0.172149	-0.0116252	12.7966	5.72485e-36	2.47633e-35	70.5333		Olfactory transduction	0.177798	0.0089211	11.8633	2.51796e-31	1.67264e-30	60.2014		Autoimmune thyroid disease	0.278766	0.000794758	19.7568	6.87467e-79	4.91803e-78	168.639
Ribosome	0.169342	-0.0168535	8.47483	4.77763e-17	1.26949e-16	27.4013		Limonene and pinene degradation	0.176987	0.020439	8.27464	2.45519e-16	6.08888e-16	26.1584		Cell adhesion molecules cams	0.27695	0.00717856	30.2515	2.78118e-163	3.97923e-162	362.541
Protein export	0.166061	0.00209347	10.0989	2.26721e-23	7.6673e-23	41.7806		Folate biosynthesis	0.175991	0.0152905	9.83855	2.72264e-22	8.73121e-22	39.6556		Chemokine signaling pathway	0.26962	0.00290148	39.2448	9.05606e-245	1.68443e-242	549.869
Pyrimidine metabolism	0.165542	-0.00890324	17.0459	1.41882e-60	1.46611e-59	126.859		Histidine metabolism	0.172544	0.0163335	11.4303	2.84664e-29	1.51279e-28	55.5267		T cell receptor signaling pathway	0.265708	-0.00495707	35.3366	7.68796e-209	2.85992e-207	467.27
Terpenoid backbone biosynthesis	0.150738	0.00275928	8.55569	2.442e-17	6.63831e-17	28.0627		Ppar signaling pathway	0.172163	0.0119962	12.945	9.84553e-37	9.63825e-36	72.5233		Viral myocarditis	0.264569	0.00635511	31.4354	1.02349e-173	2.11521e-172	386.525
Ubiquitin mediated proteolysis	0.139475	-0.00493922	15.1192	9.53836e-49	6.1177e-48	99.7678		Valine leucine and isoleucine degradation	0.166937	0.0177445	8.65532	1.05976e-17	2.81593e-17	29.2469		Fc gamma r mediated phagocytosis	0.253159	-0.00505336	23.7838	3.87026e-109	3.12986e-108	238.113
N glycan biosynthesis	0.134534	-0.000607836	11.6767	1.96593e-30	7.61799e-30	57.8867		Metabolism of xenobiotics by cytochrome p450	0.165822	0.0202524	10.444	7.70548e-25	3.18493e-24	45.4445		Cytokine cytokine receptor interaction	0.241598	0.00530096	26.6294	2.87411e-132	2.96991e-131	291.259
Steroid biosynthesis	0.117636	-0.00273306	6.61456	4.88081e-11	1.04348e-10	13.8132		Beta alanine metabolism	0.165418	0.0145211	9.86612	2.09822e-22	6.84681e-22	39.9125		Toll like receptor signaling pathway	0.236721	0.00118774	29.5115	7.93505e-157	1.05423e-155	347.703
Valine leucine and isoleucine biosynthesis	0.112368	-0.00141131	6.58323	5.99964e-11	1.26811e-10	13.6115		Butanoate metabolism	0.164573	0.0134918	9.97506	7.44842e-23	2.56557e-22	40.9339		Leukocyte transendothelial migration	0.233392	0.00606038	29.1583	9.13611e-154	1.06207e-152	340.667
Thyroid cancer	0.102289	-0.00869077	10.5548	2.54753e-25	8.9404e-25	46.2227		Linoleic acid metabolism	0.153389	0.0164185	10.0294	4.42882e-23	1.64752e-22	41.4467		Prion diseases	0.217442	0.000181415	21.0042	6.65646e-88	5.15876e-87	189.336
Huntingtons disease	0.0986374	-0.00036822	9.85407	2.35143e-22	7.67307e-22	39.4673		Ascorbate and aldarate metabolism	0.153148	0.0289132	7.15124	1.23923e-12	2.53293e-12	17.8011		Glycosaminoglycan biosynthesis chondroitin sulfate	0.215962	0.00555868	14.3179	3.79456e-44	1.68045e-43	88.9488
Oxidative phosphorylation	0.0978439	0.00400674	6.7662	1.77513e-11	3.93064e-11	14.8022		Drug metabolism other enzymes	0.151726	0.0121475	10.003	5.70457e-23	2.00198e-22	41.197		Apoptosis	0.200082	0.00275301	24.8628	9.26886e-118	8.20957e-117	257.919
Oocyte meiosis	0.0966861	-0.00611597	12.4307	4.10172e-34	1.69538e-33	66.2935		Nitrogen metabolism	0.151668	0.0142034	12.8069	5.07115e-36	4.49159e-35	70.9006		Jak stat signaling pathway	0.199621	0.000343981	26.1635	2.13247e-128	2.08758e-127	282.364
Riboflavin metabolism	0.0871053	-0.00213011	7.23965	6.59924e-13	1.55375e-12	18.0271		Propanoate metabolism	0.139537	0.0204047	7.25471	5.92351e-13	1.23795e-12	18.5229		Fc epsilon ri signaling pathway	0.179952	0.00051772	25.1774	2.61632e-120	2.43318e-119	263.777
Parkinsons disease	0.0841082	0.00503499	5.76653	9.48261e-09	1.78158e-08	8.67807		Lysine degradation	0.137157	0.00226498	10.0104	5.31091e-23	1.93692e-22	41.2675		Glycosaminoglycan biosynthesis keratan sulfate	0.164472	-0.00431158	11.7744	6.73292e-31	2.31912e-30	58.6283
Circadian rhythm mammal	0.0804336	-0.0093187	5.26493	1.56803e-07	2.72574e-07	5.96011		Proximal tubule bicarbonate reclamation	0.136507	0.00892024	10.8946	8.02885e-27	3.82914e-26	49.9514		Phosphatidylinositol signaling system	0.161818	-0.00250472	18.9275	4.29979e-73	2.7578e-72	155.334
Citrate cycle tca cycle	0.0757867	0.011445	4.63695	3.78692e-06	6.23334e-06	2.89603		Taste transduction	0.130289	0.00938757	10.6036	1.55992e-25	6.59419e-25	47.0214		Pathogenic escherichia coli infection	0.15925	-0.00440708	14.0991	6.31887e-43	2.67116e-42	86.1509
Glutathione metabolism	0.0699106	0.00370422	6.01888	2.11771e-09	4.19036e-09	10.1356		Renin angiotensin system	0.128463	0.0153186	8.86344	1.80213e-18	5.00293e-18	30.9895		Cytosolic dna sensing pathway	0.157964	0.000833922	18.0004	8.22685e-67	5.10065e-66	140.917
Sphingolipid metabolism	0.0677556	-0.00582019	6.21105	6.50189e-10	1.30038e-09	11.2857		Pentose and glucuronate interconversions	0.116973	0.0234153	6.16507	8.65101e-10	1.50382e-09	11.4161		Ecm receptor interaction	0.154603	0.00134126	13.0749	2.07898e-37	8.22744e-37	73.5189
Selenoamino acid metabolism	0.0648963	-0.000203509	4.66558	3.3014e-06	5.48268e-06	3.02747		Arginine and proline metabolism	0.112978	0.00872343	8.5477	2.61014e-17	6.56063e-17	28.3608		Focal adhesion	0.151827	5.85479e-05	16.2095	2.60763e-55	1.46975e-54	114.534
Amino sugar and nucleotide sugar metabolism	0.0638895	0.00715628	5.77487	9.03226e-09	1.71429e-08	8.72533		Arachidonic acid metabolism	0.107201	0.0168734	8.55123	2.53448e-17	6.45771e-17	28.3897		Pancreatic cancer	0.151255	-0.00614761	16.0011	4.98261e-54	2.72578e-53	111.597
Purine metabolism	0.0629758	-0.00310594	10.4267	9.15072e-25	3.15191e-24	44.9569		Glycosphingolipid biosynthesis lacto and neolacto series	0.0999597	-8.18901e-05	8.11473	8.84976e-16	2.13773e-15	24.8994		Acute myeloid leukemia	0.14528	-0.00314429	15.9883	5.96113e-54	3.16791e-53	111.418
Biosynthesis of unsaturated fatty acids	0.0586824	0.000269435	3.97574	7.28955e-05	0.000107608	0.0807915		Glycerolipid metabolism	0.0976563	0.00365832	10.4276	9.06295e-25	3.66458e-24	45.2843		Inositol phosphate metabolism	0.143678	-0.00432499	14.8537	3.35231e-47	1.55883e-46	95.9456
Snare interactions in vesicular transport	0.0586002	-0.00844365	5.38818	8.04111e-08	1.41099e-07	6.60579		Glycolysis gluconeogenesis	0.096572	0.0123912	8.21365	4.01455e-16	9.82509e-16	25.6755		Vegf signaling pathway	0.14263	-0.00125097	19.5288	2.80172e-77	1.86114e-76	164.943
Pantothenate and coa biosynthesis	0.0507014	-0.00645203	3.68786	0.000232763	0.000330487	-1.0122		Abc transporters	0.0952848	0.00478126	9.17109	1.22613e-19	3.50862e-19	33.6349		Dorso ventral axis formation	0.136995	-0.000348595	11.2441	2.07677e-28	6.77683e-28	52.9407
Lysine degradation	0.0467716	0.00226498	3.59096	0.000338174	0.000476518	-1.3619		Calcium signaling pathway	0.0944772	0.0100518	9.8342	2.83673e-22	8.94291e-22	39.6151		Regulation of actin cytoskeleton	0.135151	-0.00180021	19.5894	1.04754e-77	7.21635e-77	165.923
Pentose phosphate pathway	0.0459792	0.00397435	4.05869	5.14314e-05	7.653e-05	0.41071		Starch and sucrose metabolism	0.0922623	0.0122696	7.32014	3.69574e-13	7.90124e-13	18.9845		Vascular smooth muscle contraction	0.134412	0.00471277	17.3876	8.85688e-63	5.14806e-62	131.666
Bladder cancer	0.0412932	-0.0079561	3.8294	0.000132794	0.000194485	-0.484918		Pyruvate metabolism	0.0869323	0.0122687	5.61061	2.32528e-08	3.86163e-08	8.22469		Small cell lung cancer	0.133945	-0.0044984	15.5367	3.21629e-51	1.66175e-50	105.155
Alzheimers disease	0.0409788	0.00517262	4.49684	7.33103e-06	1.14586e-05	2.26414		Complement and coagulation cascades	0.0850698	0.01492	4.83015	1.4782e-06	2.14801e-06	4.22593		Complement and coagulation cascades	0.131021	0.01492	7.66668	2.84996e-14	6.23638e-14	20.754
Porphyrin and chlorophyll metabolism	0.0365133	0.0122643	2.63239	0.00855004	0.011121	-4.32506		Biosynthesis of unsaturated fatty acids	0.0793531	0.000269435	5.00603	6.09152e-07	9.28707e-07	5.07639		Epithelial cell signaling in helicobacter pylori infection	0.1278	-0.00219495	14.1439	3.56173e-43	1.54065e-42	86.7212
P53 signaling pathway	0.0356198	-0.00641809	3.79917	0.000149937	0.000217877	-0.599174		Adipocytokine signaling pathway	0.0779289	0.00402252	8.59718	1.7268e-17	4.52372e-17	28.7669		Ether lipid metabolism	0.124879	0.0089126	11.954	9.17788e-32	3.22092e-31	60.6066
Vibrio cholerae infection	0.0323298	-0.00270969	3.78115	0.000161125	0.00023232	-0.666849		Alanine aspartate and glutamate metabolism	0.0756013	0.015846	5.64791	1.88e-08	3.15027e-08	8.43033		Colorectal cancer	0.11851	-0.00399558	12.9929	5.55478e-37	2.15248e-36	72.5421
Chronic myeloid leukemia	0.0288155	-0.00749829	2.91943	0.00354969	0.00474994	-3.53256		Basal cell carcinoma	0.0717259	0.000863531	6.99089	3.81669e-12	7.63337e-12	16.7017		Lysosome	0.116383	-0.00475174	10.845	1.33727e-26	3.94812e-26	48.8103
Progesterone mediated oocyte maturation	0.0268527	-0.00343484	3.70815	0.000215014	0.000307636	-0.937813		Citrate cycle tca cycle	0.071432	0.011445	4.05384	5.25002e-05	7.07611e-05	0.82765		Glycosphingolipid biosynthesis ganglio series	0.115116	0.00355918	8.02534	1.79473e-15	4.12123e-15	23.4755
Regulation of autophagy	0.0259372	-0.00106212	2.54035	0.0111565	0.0143111	-4.56197		Hedgehog signaling pathway	0.0672735	0.00524503	6.69681	2.82728e-11	5.36605e-11	14.7469		Chronic myeloid leukemia	0.114582	-0.00749829	11.3649	5.74214e-29	1.90721e-28	54.2161
Wnt signaling pathway	0.024313	-0.00167252	4.10572	4.20839e-05	6.31258e-05	0.60074		One carbon pool by folate	0.0645667	0.00526665	4.42208	1.03513e-05	1.44762e-05	2.36716		Renal cell carcinoma	0.114443	-0.00315541	11.2197	2.68882e-28	8.62276e-28	52.6845
One carbon pool by folate	0.0237483	0.00526665	1.74328	0.0814526	0.0941005	-6.26271		Alpha linolenic acid metabolism	0.0575765	0.0185943	4.13603	3.69415e-05	5.08972e-05	1.15987		Sulfur metabolism	0.113625	0.00196107	7.76017	1.40159e-14	3.1409e-14	21.4522
Adherens junction	0.0228766	0.000116906	2.61905	0.0088906	0.0114837	-4.35993		Aldosterone regulated sodium reabsorption	0.0563999	0.0037196	6.85263	9.8809e-12	1.91442e-11	15.7727		Prostate cancer	0.107279	-0.00276415	12.5107	1.62716e-34	6.17658e-34	66.8983
Vasopressin regulated water reabsorption	0.02231	-0.00638089	2.44055	0.0147592	0.0184243	-4.80937		Dilated cardiomyopathy	0.0536568	0.00518672	4.94034	8.51115e-07	1.24651e-06	4.75527		Neurotrophin signaling pathway	0.106949	-0.00423156	15.0675	1.91767e-48	9.38651e-48	98.7931
Peroxisome	0.021625	0.0169236	1.35771	0.174723	0.195774	-6.85904		Cardiac muscle contraction	0.0517505	0.00551297	5.00175	6.22646e-07	9.41562e-07	5.05535		Pathways in cancer	0.103414	-0.00176339	17.5981	3.74207e-64	2.24524e-63	134.818
Cysteine and methionine metabolism	0.0210875	0.00117844	1.96329	0.0497636	0.0593336	-5.85622		Hypertrophic cardiomyopathy hcm	0.049742	0.0058901	4.96115	7.65886e-07	1.13964e-06	4.85654		Arachidonic acid metabolism	0.102804	0.0168734	8.36503	1.17781e-16	2.92098e-16	26.1597
Endometrial cancer	0.0209894	7.86392e-05	2.53774	0.0112398	0.0143192	-4.56857		Type ii diabetes mellitus	0.048292	0.00568642	5.41541	6.92486e-08	1.13984e-07	7.17026		Tgf beta signaling pathway	0.101523	-0.000713121	11.0116	2.38911e-27	7.16734e-27	50.518
Non small cell lung cancer	0.0201181	-0.0069816	2.50215	0.0124309	0.0156226	-4.65782		Arrhythmogenic right ventricular cardiomyopathy arvc	0.047912	0.00492727	5.10802	3.5956e-07	5.66764e-07	5.58309		Mtor signaling pathway	0.0979791	-0.00389768	11.1714	4.47781e-28	1.38812e-27	52.1786
Erbb signaling pathway	0.0182034	-0.0024013	2.4342	0.0150202	0.018625	-4.8248		Glycosaminoglycan biosynthesis heparan sulfate	0.0447814	-0.000925556	4.11781	3.99565e-05	5.46463e-05	1.08566		Type ii diabetes mellitus	0.0967888	0.00568642	11.3777	5.0049e-29	1.69257e-28	54.3524
Renal cell carcinoma	0.0160527	-0.00315541	1.6063	0.108382	0.123675	-6.49152		Asthma	0.0425767	0.00655789	2.53913	0.0111952	0.0139753	-4.11581		Axon guidance	0.0920623	-0.00218445	12.0474	3.22683e-32	1.15421e-31	61.6445
Pathogenic escherichia coli infection	0.0130912	-0.00440708	1.16113	0.245743	0.270462	-7.10612		Glyoxylate and dicarboxylate metabolism	0.0396038	0.0148049	2.24664	0.0247823	0.0299319	-4.8109		Rig i like receptor signaling pathway	0.0904104	-0.00394488	11.0351	1.86877e-27	5.69822e-27	50.7616
Endocytosis	0.0118638	-0.00357404	1.8421	0.0656226	0.077647	-6.08608		Glycosaminoglycan degradation	0.039573	-0.000112556	3.2068	0.00136545	0.00175155	-2.21355		Dilated cardiomyopathy	0.0858694	0.00518672	8.16366	5.99328e-16	1.41108e-15	24.5559
Pyruvate metabolism	0.011471	0.0122687	0.790427	0.429381	0.457097	-7.46722		Amyotrophic lateral sclerosis als	0.0391375	0.00435066	5.28731	1.39042e-07	2.24886e-07	6.49789		Mapk signaling pathway	0.0838537	0.000122277	15.3913	2.36591e-50	1.18935e-49	103.168
Limonene and pinene degradation	0.00992069	0.020439	0.490286	0.62399	0.655719	-7.65915		Terpenoid backbone biosynthesis	0.0389846	0.00275928	2.01745	0.0437947	0.0518842	-5.29649		Notch signaling pathway	0.0838273	-0.0121353	6.27184	4.44412e-10	7.38041e-10	11.2899
Colorectal cancer	0.00940032	-0.00399558	1.04006	0.298452	0.320978	-7.23913		Selenoamino acid metabolism	0.0361061	-0.000203509	2.40053	0.016471	0.0201553	-4.45571		Alpha linolenic acid metabolism	0.0814624	0.0185943	6.00473	2.30705e-09	3.73141e-09	9.68398
Pancreatic cancer	0.00374835	-0.00614761	0.391599	0.6954	0.721312	-7.70261		Porphyrin and chlorophyll metabolism	0.0348527	0.0122643	2.33287	0.0197633	0.0240259	-4.61476		Bladder cancer	0.0796666	-0.0079561	7.07276	2.15557e-12	4.17641e-12	16.5048
O glycan biosynthesis	0.00367928	0.00325325	0.324331	0.745724	0.766324	-7.72666		Cysteine and methionine metabolism	0.0340996	0.00117844	2.95265	0.00319086	0.00403742	-2.98928		O glycan biosynthesis	0.0710478	0.00325325	5.99682	2.41989e-09	3.88017e-09	9.63746
Mtor signaling pathway	0.00333577	-0.00389768	0.388024	0.698044	0.721312	-7.704		Steroid biosynthesis	0.0330512	-0.00273306	1.70719	0.0879574	0.100988	-5.87104		Melanoma	0.0671996	0.00181437	9.47223	8.16292e-21	2.30046e-20	35.6178
Nicotinate and nicotinamide metabolism	0.00137663	0.00726015	0.120605	0.904017	0.911164	-7.77193		Melanogenesis	0.0304912	-0.00144558	3.87081	0.00011229	0.000149186	0.111324		Galactose metabolism	0.0668614	0.00983298	5.85645	5.59569e-09	8.60164e-09	8.82145
Fructose and mannose metabolism	0.000712064	0.0019825	0.0712397	0.943215	0.943215	-7.77666		Circadian rhythm mammal	0.0295123	-0.0093187	1.78236	0.0748575	0.0864814	-5.74059		Glioma	0.0641134	-0.00392404	8.29155	2.14134e-16	5.17259e-16	25.5703
Ascorbate and aldarate metabolism	-0.00237512	0.0289132	-0.117767	0.906265	0.911164	-7.77227		Glycosphingolipid biosynthesis globo series	0.0292453	0.00170616	2.23343	0.0256415	0.0307698	-4.8403		Calcium signaling pathway	0.063359	0.0100518	6.64087	4.10169e-11	7.47955e-11	13.6187
Insulin signaling pathway	-0.00286797	-0.00397222	-0.463951	0.642738	0.671625	-7.6717		Autoimmune thyroid disease	0.025975	0.000794758	1.63794	0.101606	0.115237	-5.98625		Hypertrophic cardiomyopathy hcm	0.0614038	0.0058901	6.27785	4.27918e-10	7.17052e-10	11.3269
Other glycan degradation	-0.00295967	-0.00298017	-0.195424	0.845082	0.858936	-7.76012		Sulfur metabolism	0.0247772	0.00196107	1.63211	0.102828	0.115916	-5.99573		P53 signaling pathway	0.0585942	-0.00641809	5.96042	3.01286e-09	4.74909e-09	9.42402
Tight junction	-0.00302224	0.00381117	-0.530874	0.59557	0.62941	-7.63845		Nicotinate and nicotinamide metabolism	0.0224554	0.00726015	1.82891	0.067576	0.0790512	-5.657		Adherens junction	0.0539407	0.000116906	5.90093	4.29896e-09	6.66339e-09	9.07797
Notch signaling pathway	-0.00306926	-0.0121353	-0.239615	0.810656	0.828472	-7.75052		Long term potentiation	0.0215725	0.000805583	2.9857	0.0028669	0.00365235	-2.89197		Gnrh signaling pathway	0.053057	-0.00116072	7.16798	1.10053e-12	2.15472e-12	17.1644
Inositol phosphate metabolism	-0.0102832	-0.00432499	-1.05921	0.289645	0.316906	-7.21906		Galactose metabolism	0.0211262	0.00983298	1.79731	0.072451	0.0842243	-5.71397		Endocytosis	0.0513541	-0.00357404	7.67743	2.62773e-14	5.81854e-14	20.8339
Epithelial cell signaling in helicobacter pylori infection	-0.0106952	-0.00219495	-1.18536	0.236028	0.261317	-7.07774		Tight junction	0.0179551	0.00381117	2.9359	0.00336738	0.00423198	-3.03816		Snare interactions in vesicular transport	0.0465092	-0.00844365	4.04122	5.53816e-05	7.00747e-05	-0.0366968
Gap junction	-0.0128708	-0.000921538	-1.83981	0.0659582	0.077647	-6.09029		Alzheimers disease	0.0066897	0.00517262	0.678172	0.497749	0.532076	-7.0926		Fructose and mannose metabolism	0.0459769	0.0019825	4.38486	1.22678e-05	1.62986e-05	1.39672
Glycerophospholipid metabolism	-0.0130327	-8.09015e-05	-1.76368	0.0779531	0.0906205	-6.22705		Glycerophospholipid metabolism	0.00493177	-8.09015e-05	0.619412	0.535722	0.569396	-7.13057		Long term depression	0.0427519	0.002005	6.43571	1.56643e-10	2.74864e-10	12.3084
Glioma	-0.0134247	-0.00392404	-1.79864	0.0722409	0.0845082	-6.16496		Pentose phosphate pathway	0.00322476	0.00397435	0.263212	0.792417	0.818831	-7.28716		Progesterone mediated oocyte maturation	0.0417027	-0.00343484	5.48613	4.68261e-08	7.08102e-08	6.75819
Pentose and glucuronate interconversions	-0.0140507	0.0234153	-0.789257	0.430064	0.457097	-7.46815		Oxidative phosphorylation	0.0031022	0.00400674	0.196805	0.844002	0.867317	-7.30238		Vasopressin regulated water reabsorption	0.0408025	-0.00638089	4.24675	2.2781e-05	2.98399e-05	0.806838
Lysosome	-0.0142858	-0.00475174	-1.36136	0.173568	0.195659	-6.8541		Other glycan degradation	0.00215361	-0.00298017	0.132078	0.894937	0.904664	-7.31298		Gap junction	0.0391225	-0.000921538	5.34051	1.04287e-07	1.55179e-07	5.98258
Butanoate metabolism	-0.0163656	0.0134918	-1.0403	0.298337	0.320978	-7.23887		Gnrh signaling pathway	-0.00043402	-0.00116072	-0.0566282	0.954848	0.954848	-7.32007		Sphingolipid metabolism	0.0385504	-0.00582019	3.32615	0.000898004	0.0010846	-2.6505
Maturity onset diabetes of the young	-0.0176554	0.0133044	-1.25642	0.209126	0.232919	-6.99117		Vascular smooth muscle contraction	-0.000638417	0.00471277	-0.0749119	0.940293	0.945376	-7.31888		Non small cell lung cancer	0.0374325	-0.0069816	4.43136	9.92023e-06	1.32746e-05	1.59951
Propanoate metabolism	-0.0188373	0.0204047	-1.03986	0.298544	0.320978	-7.23933		Cytokine cytokine receptor interaction	-0.00166044	0.00530096	-0.152124	0.879106	0.898427	-7.31014		Long term potentiation	0.032976	0.000805583	4.67732	3.12e-06	4.33074e-06	2.70682
Tgf beta signaling pathway	-0.0208219	-0.000713121	-2.30947	0.0210286	0.0253981	-5.11937		Glycosylphosphatidylinositol gpi anchor biosynthesis	-0.00203051	-0.00632663	-0.1337	0.893655	0.904664	-7.31277		Erbb signaling pathway	0.0328147	-0.0024013	4.17478	3.12317e-05	4.00627e-05	0.506802
Alanine aspartate and glutamate metabolism	-0.0216418	0.015846	-1.7271	0.0843195	0.0968112	-6.29072		Melanoma	-0.00298792	0.00181437	-0.402659	0.687246	0.719679	-7.24091		Endometrial cancer	0.0318374	7.86392e-05	3.65745	0.00026196	0.000320556	-1.50166
Cardiac muscle contraction	-0.0225352	0.00551297	-2.33257	0.019779	0.0242032	-5.06598		Parkinsons disease	-0.0043023	0.00503499	-0.271516	0.786025	0.816763	-7.28495		Amyotrophic lateral sclerosis als	0.0289166	0.00435066	3.97625	7.2743e-05	9.14203e-05	-0.294825
Glycosaminoglycan biosynthesis heparan sulfate	-0.0238029	-0.000925556	-2.34921	0.0189196	0.0233049	-5.0272		Insulin signaling pathway	-0.00701697	-0.00397222	-1.05453	0.291779	0.321129	-6.7679		Linoleic acid metabolism	0.0259145	0.0164185	1.68529	0.0921032	0.103825	-6.74542
Prostate cancer	-0.0242131	-0.00276415	-2.86388	0.00423263	0.00558347	-3.69226		Valine leucine and isoleucine biosynthesis	-0.00744926	-0.00141131	-0.400649	0.688725	0.719679	-7.24171		Melanogenesis	0.0209842	-0.00144558	2.71463	0.00669746	0.00798543	-4.4878
Small cell lung cancer	-0.0252755	-0.0044984	-2.91204	0.00363441	0.00482858	-3.55399		Jak stat signaling pathway	-0.00805146	0.000343981	-0.88153	0.378147	0.413738	-6.93466		Glycosaminoglycan degradation	0.0171239	-0.000112556	1.41346	0.157692	0.171524	-7.16594
Proximal tubule bicarbonate reclamation	-0.0277107	0.00892024	-2.31061	0.0209655	0.0253981	-5.11675		Glycosphingolipid biosynthesis ganglio series	-0.00880668	0.00355918	-0.591128	0.554508	0.586014	-7.14762		Glycosphingolipid biosynthesis globo series	0.0114879	0.00170616	0.894628	0.371104	0.389973	-7.76408
Valine leucine and isoleucine degradation	-0.0285593	0.0177445	-1.56352	0.118104	0.133947	-6.55914		Cell adhesion molecules cams	-0.00938844	0.00717856	-0.819887	0.412387	0.445954	-6.98688		Ribosome	0.0110017	-0.0168535	0.512097	0.608645	0.625458	-8.03299
Long term depression	-0.0290227	0.002005	-4.58069	4.94788e-06	8.00265e-06	2.64005		Hematopoietic cell lineage	-0.00975824	0.00409914	-0.790009	0.429625	0.461909	-7.01083		Insulin signaling pathway	0.00992302	-0.00397222	1.52356	0.127791	0.141483	-7.00448
Neurotrophin signaling pathway	-0.0319563	-0.00423156	-4.5013	7.1804e-06	1.13183e-05	2.28398		Long term depression	-0.0109133	0.002005	-1.59176	0.111613	0.12506	-6.06044		Glycerophospholipid metabolism	0.00976309	-8.09015e-05	1.25255	0.210531	0.226351	-7.38017
Pathways in cancer	-0.0323789	-0.00176339	-5.41362	6.99344e-08	1.25075e-07	6.74087		Base excision repair	-0.0129048	-0.0113058	-0.859167	0.390361	0.424604	-6.95404		Vibrio cholerae infection	0.00925669	-0.00270969	1.02299	0.306446	0.325709	-7.64109
Glyoxylate and dicarboxylate metabolism	-0.0341308	0.0148049	-2.08414	0.0372863	0.0447436	-5.6125		Mapk signaling pathway	-0.0130733	0.000122277	-2.21305	0.0270177	0.0322134	-4.88532		Hedgehog signaling pathway	0.00895273	0.00524503	0.899141	0.368696	0.389645	-7.76004
Glycosphingolipid biosynthesis globo series	-0.0355595	0.00170616	-2.92662	0.00346901	0.00467562	-3.51166		Glutathione metabolism	-0.0143629	0.00370422	-1.1377	0.255394	0.282758	-6.67714		Arrhythmogenic right ventricular cardiomyopathy arvc	0.00628937	0.00492727	0.679873	0.496671	0.516094	-7.93305
Aldosterone regulated sodium reabsorption	-0.0359185	0.0037196	-4.66702	3.27859e-06	5.48268e-06	3.03411		Regulation of autophagy	-0.0168323	-0.00106212	-1.5295	0.126314	0.140686	-6.15711		Wnt signaling pathway	0.00537146	-0.00167252	0.856683	0.391733	0.409339	-7.79729
Starch and sucrose metabolism	-0.0363644	0.0122696	-3.06958	0.00217516	0.00297485	-3.08565		Ecm receptor interaction	-0.0210249	0.00134126	-1.66668	0.0957502	0.109261	-5.93901		Amino sugar and nucleotide sugar metabolism	0.00225514	0.00715628	0.191549	0.848117	0.86202	-8.14573
Glycolysis gluconeogenesis	-0.0390264	0.0123912	-3.52132	0.000439957	0.000615278	-1.60757		Gap junction	-0.0258528	-0.000921538	-3.44026	0.000594226	0.000767541	-1.44519		Other glycan degradation	0.00122533	-0.00298017	0.0767143	0.938859	0.949064	-8.16113
Acute myeloid leukemia	-0.0416895	-0.00314429	-4.55682	5.53759e-06	8.87924e-06	2.53233		Systemic lupus erythematosus	-0.0288252	0.00603061	-1.89993	0.0575991	0.0678066	-5.52532		Abc transporters	0.0006506	0.00478126	0.0625093	0.950164	0.9553	-8.16212
Folate biosynthesis	-0.0429338	0.0152905	-2.52257	0.0117346	0.0148479	-4.60678		Purine metabolism	-0.02964	-0.00310594	-4.45183	9.02889e-06	1.27225e-05	2.49726		Glyoxylate and dicarboxylate metabolism	-4.07205e-05	0.0148049	-0.00235485	0.998121	0.998121	-8.16407
Arginine and proline metabolism	-0.0436748	0.00872343	-3.50017	0.000476129	0.000660896	-1.68124		Rig i like receptor signaling pathway	-0.0321004	-0.00394488	-3.7293	0.000197876	0.000261028	-0.420207		Renin angiotensin system	-0.00386189	0.0153186	-0.266348	0.790001	0.807364	-8.12861
Beta alanine metabolism	-0.0441784	0.0145211	-2.76995	0.00566327	0.00741808	-3.95541		Axon guidance	-0.0332006	-0.00218445	-4.11394	4.06257e-05	5.51561e-05	1.06995		Adipocytokine signaling pathway	-0.00503041	0.00402252	-0.55555	0.578587	0.597873	-8.00981
Melanogenesis	-0.0451724	-0.00144558	-6.21377	6.39252e-10	1.2924e-09	11.3023		Wnt signaling pathway	-0.0337794	-0.00167252	-5.31429	1.20206e-07	1.96126e-07	6.63822		Oocyte meiosis	-0.0123391	-0.00611597	-1.44543	0.148509	0.162486	-7.12029
Histidine metabolism	-0.0464296	0.0163335	-3.20797	0.00135992	0.00187367	-2.65412		Pantothenate and coa biosynthesis	-0.036099	-0.00645203	-2.43372	0.0150397	0.0185258	-4.37603		Regulation of autophagy	-0.0126968	-0.00106212	-1.17759	0.239113	0.255604	-7.47115
Arrhythmogenic right ventricular cardiomyopathy arvc	-0.0469898	0.00492727	-5.39818	7.61229e-08	1.34846e-07	6.65882		Intestinal immune network for iga production	-0.0377384	0.00106914	-2.4781	0.0132983	0.0164899	-4.26782		Basal cell carcinoma	-0.0137925	0.000863531	-1.35518	0.175527	0.189814	-7.2465
Gnrh signaling pathway	-0.0473287	-0.00116072	-6.73065	2.25439e-11	4.87577e-11	14.5685		Huntingtons disease	-0.0381936	-0.00036822	-3.46464	0.000543215	0.000711535	-1.3619		Tight junction	-0.0138675	0.00381117	-2.31403	0.0207765	0.0244584	-5.49128
Long term potentiation	-0.0482597	0.000805583	-7.27732	5.03457e-13	1.21614e-12	18.2925		N glycan biosynthesis	-0.0441451	-0.000607836	-3.444	0.000586133	0.000762382	-1.43247		Aldosterone regulated sodium reabsorption	-0.0141691	0.0037196	-1.73715	0.0825291	0.0936001	-6.65685
Glycosphingolipid biosynthesis lacto and neolacto series	-0.0489152	-8.18901e-05	-4.22064	2.5557e-05	3.86472e-05	1.07411		Vibrio cholerae infection	-0.0471208	-0.00270969	-5.13541	3.11583e-07	4.95338e-07	5.72085		Glycosaminoglycan biosynthesis heparan sulfate	-0.0164958	-0.000925556	-1.54251	0.123123	0.137131	-6.97547
Basal cell carcinoma	-0.0494793	0.000863531	-5.16136	2.71866e-07	4.68214e-07	5.42876		Fructose and mannose metabolism	-0.0487402	0.0019825	-4.55479	5.59066e-06	7.99895e-06	2.95408		Glycerolipid metabolism	-0.0177837	0.00365832	-1.88538	0.0595371	0.0683575	-6.38891
Glycosaminoglycan degradation	-0.0495367	-0.000112556	-4.33185	1.55896e-05	2.37678e-05	1.54439		Riboflavin metabolism	-0.0511708	-0.00213011	-3.911	9.52785e-05	0.000127495	0.265829		Neuroactive ligand receptor interaction	-0.0205506	0.0128214	-1.55424	0.120302	0.134796	-6.95735
Nitrogen metabolism	-0.0509369	0.0142034	-4.45989	8.69967e-06	1.34845e-05	2.10066		Glioma	-0.051255	-0.00392404	-6.44456	1.47961e-10	2.67192e-10	13.134		Pantothenate and coa biosynthesis	-0.0217527	-0.00645203	-1.49562	0.134925	0.148498	-7.04659
Rig i like receptor signaling pathway	-0.0535934	-0.00394488	-6.76134	1.83414e-11	4.01354e-11	14.7703		Thyroid cancer	-0.053982	-0.00869077	-5.05767	4.67004e-07	7.29939e-07	5.33171		Taste transduction	-0.0222018	0.00938757	-1.79192	0.0733107	0.0836552	-6.56039
Axon guidance	-0.0541294	-0.00218445	-7.29225	4.521e-13	1.10646e-12	18.398		Erbb signaling pathway	-0.0552977	-0.0024013	-6.94687	5.17622e-12	1.02423e-11	16.404		Nicotinate and nicotinamide metabolism	-0.0230784	0.00726015	-1.91914	0.055122	0.0640794	-6.32483
Fatty acid metabolism	-0.0541457	0.0173152	-2.94889	0.00322974	0.00438491	-3.44663		Dorso ventral axis formation	-0.0561958	-0.000348595	-4.39213	1.18683e-05	1.64739e-05	2.23705		Cardiac muscle contraction	-0.0245931	0.00551297	-2.41422	0.0158669	0.0187978	-5.25522
Phosphatidylinositol signaling system	-0.0567808	-0.00250472	-6.47619	1.20612e-10	2.52065e-10	12.9294		Endometrial cancer	-0.0575085	7.86392e-05	-6.52129	8.9982e-11	1.67367e-10	13.6184		Cell cycle	-0.0260198	-0.0163342	-1.89866	0.0577664	0.0667364	-6.36384
Melanoma	-0.0578408	0.00181437	-8.55885	2.37853e-17	6.60309e-17	28.0887		Prion diseases	-0.0602579	0.000181415	-5.15343	2.83451e-07	4.54499e-07	5.81191		Proteasome	-0.0406194	0.00564972	-2.06718	0.0388581	0.0454566	-6.03049
Ether lipid metabolism	-0.057933	0.0089126	-5.68136	1.55204e-08	2.85822e-08	8.19977		Non small cell lung cancer	-0.0623294	-0.0069816	-7.29172	4.53831e-13	9.59234e-13	18.7835		Glycosphingolipid biosynthesis lacto and neolacto series	-0.0415117	-8.18901e-05	-3.3906	0.000712275	0.000865903	-2.43546
Ppar signaling pathway	-0.0580783	0.0119962	-4.52476	6.43629e-06	1.0232e-05	2.38854		Leukocyte transendothelial migration	-0.0624623	0.00606038	-6.3827	2.20073e-10	3.89843e-10	12.7475		Purine metabolism	-0.0416026	-0.00310594	-6.41864	1.74815e-10	3.03883e-10	12.2011
Amyotrophic lateral sclerosis als	-0.0597637	0.00435066	-8.80858	2.88539e-18	8.25665e-18	30.1686		Ether lipid metabolism	-0.0629919	0.0089126	-5.73869	1.11477e-08	1.90227e-08	8.93621		Ubiquitin mediated proteolysis	-0.0467946	-0.00493922	-4.56044	5.44415e-06	7.50083e-06	2.17331
Adipocytokine signaling pathway	-0.0627086	0.00402252	-7.41109	1.90605e-13	4.72699e-13	19.2456		Focal adhesion	-0.0630636	5.85479e-05	-6.2307	5.7513e-10	1.00919e-09	11.8129		Riboflavin metabolism	-0.0477802	-0.00213011	-3.72675	0.000199872	0.000247841	-1.24776
Drug metabolism other enzymes	-0.0638534	0.0121475	-4.43671	9.67964e-06	1.48794e-05	1.99877		Fc epsilon ri signaling pathway	-0.0635182	0.00051772	-7.61611	4.16982e-14	9.45836e-14	21.1209		Starch and sucrose metabolism	-0.048085	0.0122696	-3.8545	0.000119981	0.000149776	-0.76741
Mapk signaling pathway	-0.0641135	0.000122277	-12.1315	1.25e-32	5.05434e-32	62.9032		Regulation of actin cytoskeleton	-0.0657643	-0.00180021	-8.65744	1.04098e-17	2.80613e-17	29.2645		Alanine aspartate and glutamate metabolism	-0.0484728	0.015846	-3.67856	0.000241352	0.000297295	-1.42482
Regulation of actin cytoskeleton	-0.0647761	-0.00180021	-9.20479	9.08885e-20	2.81754e-19	33.581		Endocytosis	-0.0672702	-0.00357404	-9.95156	9.3211e-23	3.15223e-22	40.7127		Glycolysis gluconeogenesis	-0.0492597	0.0123912	-4.22085	2.5534e-05	3.32121e-05	0.698293
Hedgehog signaling pathway	-0.0660881	0.00524503	-7.09345	1.86368e-12	4.33305e-12	17.0092		Viral myocarditis	-0.068186	0.00635511	-6.46401	1.30499e-10	2.3797e-10	13.2563		Alzheimers disease	-0.0519971	0.00517262	-5.42452	6.58658e-08	9.87987e-08	6.42756
Fc gamma r mediated phagocytosis	-0.0661538	-0.00505336	-5.7787	8.83282e-09	1.69372e-08	8.74701		Vasopressin regulated water reabsorption	-0.0683822	-0.00638089	-7.02988	2.90958e-12	5.88242e-12	16.9668		Pentose phosphate pathway	-0.054234	0.00397435	-4.54472	5.86166e-06	7.95816e-06	2.10258
Vegf signaling pathway	-0.0681846	-0.00125097	-9.15574	1.40481e-19	4.28352e-19	33.1511		Nucleotide excision repair	-0.0696077	-0.00900269	-5.00818	6.02489e-07	9.2614e-07	5.08695		Rna degradation	-0.0557316	-0.00909218	-4.1778	3.08237e-05	3.9814e-05	0.519296
Glycerolipid metabolism	-0.0682617	0.00365832	-7.74824	1.53492e-14	3.85805e-14	21.72		Vegf signaling pathway	-0.069608	-0.00125097	-8.66121	1.00848e-17	2.75848e-17	29.2957		Cysteine and methionine metabolism	-0.0561747	0.00117844	-4.9878	6.68699e-07	9.56754e-07	4.18784
Dorso ventral axis formation	-0.0746898	-0.000348595	-6.32008	3.27745e-10	6.69896e-10	11.9537		Pathways in cancer	-0.0702424	-0.00176339	-11.1859	3.84441e-28	1.98628e-27	52.9539		Protein export	-0.0581567	0.00209347	-3.27307	0.00108374	0.00130048	-2.82457
Glycosaminoglycan biosynthesis keratan sulfate	-0.0753638	-0.00431158	-5.53117	3.64066e-08	6.63886e-08	7.37302		Cytosolic dna sensing pathway	-0.0732874	0.000833922	-7.65767	3.05025e-14	7.00427e-14	21.4273		Arginine and proline metabolism	-0.0598317	0.00872343	-4.55724	5.52683e-06	7.55875e-06	2.15888
Galactose metabolism	-0.0783407	0.00983298	-7.27248	5.21338e-13	1.24319e-12	18.2583		Neurotrophin signaling pathway	-0.0744161	-0.00423156	-9.94064	1.03432e-22	3.43542e-22	40.6101		Thyroid cancer	-0.0619705	-0.00869077	-5.94348	3.33491e-09	5.21255e-09	9.32514
Cytosolic dna sensing pathway	-0.0787967	0.000833922	-8.91329	1.17233e-18	3.46117e-18	31.0571		Progesterone mediated oocyte maturation	-0.0745857	-0.00343484	-9.77675	4.87047e-22	1.50985e-21	39.0821		Glutathione metabolism	-0.0639749	0.00370422	-5.20997	2.10246e-07	3.10363e-07	5.30448
Metabolism of xenobiotics by cytochrome p450	-0.0818455	0.0202524	-5.43462	6.22936e-08	1.12491e-07	6.85285		Non homologous end joining	-0.0746583	-0.0116252	-4.97122	7.27651e-07	1.09148e-06	4.9057		Phenylalanine metabolism	-0.0664107	0.0154554	-4.06759	4.9524e-05	6.30922e-05	0.0692412
Focal adhesion	-0.0820996	5.85479e-05	-8.82424	2.52328e-18	7.33329e-18	30.3009		Glycosaminoglycan biosynthesis chondroitin sulfate	-0.0763584	0.00555868	-4.73069	2.4095e-06	3.47416e-06	3.75816		Metabolism of xenobiotics by cytochrome p450	-0.068084	0.0202524	-4.27354	2.02316e-05	2.66886e-05	0.919816
Abc transporters	-0.0827898	0.00478126	-8.55468	2.4626e-17	6.63831e-17	28.0544		Amino sugar and nucleotide sugar metabolism	-0.0764054	0.00715628	-6.42826	1.64332e-10	2.93901e-10	13.0318		Olfactory transduction	-0.0681526	0.0089211	-4.49768	7.30235e-06	9.8423e-06	1.89233
Steroid hormone biosynthesis	-0.0839559	0.0223844	-5.91479	3.95812e-09	7.74959e-09	9.52713		Natural killer cell mediated cytotoxicity	-0.0773389	-0.0022629	-7.4426	1.5127e-13	3.31015e-13	19.8588		Huntingtons disease	-0.0730589	-0.00036822	-6.82976	1.15462e-11	2.16929e-11	14.8597
Apoptosis	-0.0851804	0.00275301	-9.90227	1.48957e-22	4.94751e-22	39.9187		O glycan biosynthesis	-0.0783072	0.00325325	-6.48468	1.14155e-10	2.10226e-10	13.3866		Porphyrin and chlorophyll metabolism	-0.0740543	0.0122643	-5.08845	3.98152e-07	5.78564e-07	4.68783
Glycine serine and threonine metabolism	-0.0855169	0.0108771	-4.89361	1.07711e-06	1.8213e-06	4.1026		Type i diabetes mellitus	-0.0808754	0.00191052	-5.02164	5.62287e-07	8.71546e-07	5.15329		Drug metabolism other enzymes	-0.07457	0.0121475	-4.91888	9.48571e-07	1.33662e-06	3.85108
Tryptophan metabolism	-0.0884758	0.0184973	-5.12322	3.32117e-07	5.66732e-07	5.23565		Allograft rejection	-0.0815633	-0.00221867	-4.48894	7.60495e-06	1.07979e-05	2.66074		Drug metabolism cytochrome p450	-0.0811023	0.0221926	-4.9668	7.44213e-07	1.05667e-06	4.08474
Drug metabolism cytochrome p450	-0.0896494	0.0221926	-5.80441	7.60016e-09	1.47253e-08	8.89302		Tgf beta signaling pathway	-0.0816674	-0.000713121	-8.56827	2.19884e-17	5.68033e-17	28.5293		One carbon pool by folate	-0.088369	0.00526665	-6.21034	6.53111e-10	1.07503e-09	10.9142
Olfactory transduction	-0.0921158	0.0089211	-6.44828	1.44453e-10	2.98537e-10	12.7532		Adherens junction	-0.0827309	0.000116906	-8.97218	7.0354e-19	1.9827e-18	31.9151		Tryptophan metabolism	-0.0886403	0.0184973	-4.86327	1.25368e-06	1.75327e-06	3.58269
Taste transduction	-0.0924425	0.00938757	-7.99811	2.22261e-15	5.74173e-15	23.6203		Pyrimidine metabolism	-0.0827663	-0.00890324	-7.46346	1.29747e-13	2.87296e-13	20.0091		Nitrogen metabolism	-0.08888	0.0142034	-7.45016	1.43112e-13	2.95765e-13	19.1676
Taurine and hypotaurine metabolism	-0.092496	0.012012	-4.59706	4.57896e-06	7.47093e-06	2.7142		Prostate cancer	-0.0837347	-0.00276415	-9.39761	1.60872e-20	4.67535e-20	35.6352		Parkinsons disease	-0.0894196	0.00503499	-5.81389	7.18919e-09	1.09606e-08	8.57772
Glycosphingolipid biosynthesis ganglio series	-0.0959021	0.00355918	-7.02289	3.05495e-12	6.92951e-12	16.525		Notch signaling pathway	-0.0838029	-0.0121353	-6.13902	1.01619e-09	1.75011e-09	11.2597		Retinol metabolism	-0.0899265	0.0220241	-5.06779	4.43189e-07	6.39017e-07	4.58444
Tyrosine metabolism	-0.0965645	0.0130842	-7.02513	3.00754e-12	6.90621e-12	16.5403		Glycosaminoglycan biosynthesis keratan sulfate	-0.0840496	-0.00431158	-5.73305	1.1518e-08	1.94759e-08	8.90456		Pyruvate metabolism	-0.0961748	0.0122687	-6.35169	2.68193e-10	4.5765e-10	11.783
Hypertrophic cardiomyopathy hcm	-0.0981216	0.0058901	-10.7952	2.22777e-26	8.12482e-26	48.6355		Basal transcription factors	-0.0917341	-0.00721122	-6.94473	5.25349e-12	1.02858e-11	16.3896		Pentose and glucuronate interconversions	-0.096614	0.0234153	-5.18252	2.43162e-07	3.56127e-07	5.16394
Fc epsilon ri signaling pathway	-0.106994	0.00051772	-14.3443	2.69404e-44	1.51846e-43	89.5797		Oocyte meiosis	-0.0992109	-0.00611597	-11.8014	4.99592e-31	3.20428e-30	59.5238		Spliceosome	-0.0991188	-0.0101338	-6.39105	2.08643e-10	3.5933e-10	12.0283
Renin angiotensin system	-0.107357	0.0153186	-7.94237	3.43689e-15	8.757e-15	23.1915		Chemokine signaling pathway	-0.0998157	0.00290148	-10.8089	1.93557e-26	9.00038e-26	49.0822		Proximal tubule bicarbonate reclamation	-0.100165	0.00892024	-8.04725	1.51017e-15	3.51114e-15	23.6455
Primary bile acid biosynthesis	-0.116066	0.0246732	-5.74483	1.07574e-08	2.00087e-08	8.55559		P53 signaling pathway	-0.102351	-0.00641809	-10.3942	1.26261e-24	4.9967e-24	44.957		Ppar signaling pathway	-0.100603	0.0119962	-7.50366	9.64255e-14	2.01518e-13	19.5556
Retinol metabolism	-0.116283	0.0220241	-6.95357	4.94229e-12	1.10755e-11	16.0538		Phosphatidylinositol signaling system	-0.102823	-0.00250472	-11.1289	7.0025e-28	3.52018e-27	52.3614		Pyrimidine metabolism	-0.104702	-0.00890324	-9.73919	6.92712e-22	1.98222e-21	38.058
Toll like receptor signaling pathway	-0.116682	0.00118774	-13.21	4.06205e-38	1.84278e-37	75.4464		Acute myeloid leukemia	-0.10308	-0.00314429	-10.7289	4.3815e-26	1.89525e-25	48.2753		Selenoamino acid metabolism	-0.106826	-0.000203509	-7.34533	3.0792e-13	6.09289e-13	18.4148
Vascular smooth muscle contraction	-0.120298	0.00471277	-16.2617	1.23763e-55	1.00086e-54	115.54		Lysosome	-0.104729	-0.00475174	-9.49083	6.88589e-21	2.03298e-20	36.4713		N glycan biosynthesis	-0.107273	-0.000607836	-8.69075	7.86056e-18	2.03065e-17	28.8301
Ecm receptor interaction	-0.120863	0.00134126	-10.6213	1.30428e-25	4.66533e-25	46.8855		Mtor signaling pathway	-0.105975	-0.00389768	-11.8838	2.00592e-31	1.38186e-30	60.4263		Basal transcription factors	-0.10754	-0.00721122	-8.35929	1.2343e-16	3.02079e-16	26.1135
Alpha linolenic acid metabolism	-0.122915	0.0185943	-9.7031	9.70036e-22	3.1108e-21	38.0663		Rna polymerase	-0.106937	-0.00939289	-6.76997	1.73053e-11	3.31834e-11	15.2258		Homologous recombination	-0.108126	-0.0189185	-6.98417	3.99913e-12	7.66843e-12	15.8988
Dilated cardiomyopathy	-0.123496	0.00518672	-12.686	2.10691e-35	8.90649e-35	69.2399		Apoptosis	-0.109782	0.00275301	-11.9938	5.88112e-32	4.20726e-31	61.6398		Beta alanine metabolism	-0.109591	0.0145211	-6.57811	6.20518e-11	1.12055e-10	13.2137
Sulfur metabolism	-0.123535	0.00196107	-8.94452	8.94541e-19	2.68362e-18	31.3239		Aminoacyl trna biosynthesis	-0.109945	-0.00236756	-4.94124	8.4724e-07	1.24651e-06	4.75965		Steroid hormone biosynthesis	-0.110736	0.0223844	-7.43765	1.56889e-13	3.20673e-13	19.0773
Phenylalanine metabolism	-0.123668	0.0154554	-8.09403	1.04305e-15	2.73248e-15	24.3647		Small cell lung cancer	-0.110294	-0.0044984	-12.2495	3.27414e-33	2.64778e-32	64.4972		Tyrosine metabolism	-0.110804	0.0130842	-7.66255	2.94013e-14	6.35888e-14	20.7234
Glycosaminoglycan biosynthesis chondroitin sulfate	-0.128293	0.00555868	-8.67913	8.66982e-18	2.44331e-17	29.0836		Toll like receptor signaling pathway	-0.111452	0.00118774	-11.602	4.44243e-30	2.43027e-29	57.3631		Oxidative phosphorylation	-0.111802	0.00400674	-7.3469	3.04411e-13	6.08821e-13	18.4261
Type ii diabetes mellitus	-0.128685	0.00568642	-16.5266	2.76889e-57	2.34097e-56	119.32		Ubiquitin mediated proteolysis	-0.1129	-0.00493922	-11.0698	1.30122e-27	6.36915e-27	51.7491		Propanoate metabolism	-0.112942	0.0204047	-5.96702	2.89571e-09	4.60344e-09	9.46264
B cell receptor signaling pathway	-0.13441	-0.00264453	-13.3024	1.32174e-38	6.46958e-38	76.5613		Homologous recombination	-0.11357	-0.0189185	-7.19157	9.30488e-13	1.92301e-12	18.0812		Histidine metabolism	-0.113925	0.0163335	-7.55825	6.42786e-14	1.37423e-13	19.9542
T cell receptor signaling pathway	-0.138203	-0.00495707	-15.9397	1.17866e-53	8.7692e-53	111.007		Primary immunodeficiency	-0.11432	-0.00732149	-7.55722	6.477e-14	1.45147e-13	20.6895		Circadian rhythm mammal	-0.11778	-0.0093187	-7.36204	2.72697e-13	5.51323e-13	18.5342
Neuroactive ligand receptor interaction	-0.138446	0.0128214	-11.4228	3.08632e-29	1.17154e-28	55.1568		Snare interactions in vesicular transport	-0.116394	-0.00844365	-10.1359	1.5848e-23	6.01578e-23	42.4605		Valine leucine and isoleucine biosynthesis	-0.117832	-0.00141131	-6.54459	7.72933e-11	1.38236e-10	12.9989
Calcium signaling pathway	-0.138474	0.0100518	-16.1703	4.54354e-55	3.52124e-54	114.246		T cell receptor signaling pathway	-0.116714	-0.00495707	-12.181	7.13741e-33	5.53149e-32	63.7262		Non homologous end joining	-0.119831	-0.0116252	-8.24014	3.24435e-16	7.73654e-16	25.1608
Prion diseases	-0.143514	0.000181415	-13.7855	3.34968e-41	1.6839e-40	82.4992		Sphingolipid metabolism	-0.118712	-0.00582019	-10.2882	3.5904e-24	1.39128e-23	43.9256		Folate biosynthesis	-0.121121	0.0152905	-6.82114	1.22421e-11	2.27703e-11	14.8024
Nod like receptor signaling pathway	-0.146301	-0.000985649	-13.2657	2.06519e-38	9.60311e-38	76.1182		Antigen processing and presentation	-0.11986	-0.00334504	-9.72488	7.91628e-22	2.41382e-21	38.6033		Fatty acid metabolism	-0.125041	0.0173152	-6.51612	9.30698e-11	1.64866e-10	12.8172
Antigen processing and presentation	-0.148949	-0.00334504	-13.286	1.61284e-38	7.69203e-38	76.3637		Epithelial cell signaling in helicobacter pylori infection	-0.12079	-0.00219495	-12.9913	5.66351e-37	5.85229e-36	73.0708		Valine leucine and isoleucine degradation	-0.12842	0.0177445	-6.7441	2.05977e-11	3.79324e-11	14.2928
Linoleic acid metabolism	-0.155632	0.0164185	-11.0148	2.31037e-27	8.59459e-27	50.8802		Graft versus host disease	-0.127517	-0.0021657	-6.63538	4.25315e-11	7.99077e-11	14.3487		Primary bile acid biosynthesis	-0.130601	0.0246732	-6.13672	1.03075e-09	1.68175e-09	10.4692
Leukocyte transendothelial migration	-0.155953	0.00606038	-18.4905	4.17066e-70	4.84839e-69	148.706		Bladder cancer	-0.130888	-0.0079561	-11.6382	2.99603e-30	1.69439e-29	57.7525		Taurine and hypotaurine metabolism	-0.133783	0.012012	-6.33666	2.95074e-10	4.98943e-10	11.6898
Chemokine signaling pathway	-0.156299	0.00290148	-19.403	2.13291e-76	2.64481e-75	163.13		Protein export	-0.131875	0.00209347	-7.35596	2.8499e-13	6.16374e-13	19.2388		Rna polymerase	-0.134018	-0.00939289	-8.73147	5.56745e-18	1.45851e-17	29.1706
Leishmania infection	-0.169278	-0.00169564	-13.2025	4.45164e-38	1.97144e-37	75.3554		Colorectal cancer	-0.134401	-0.00399558	-14.5903	1.08882e-45	2.89315e-44	92.9529		Glycine serine and threonine metabolism	-0.13761	0.0108771	-7.53228	7.79836e-14	1.64829e-13	19.7643
Jak stat signaling pathway	-0.172532	0.000343981	-23.1205	6.10983e-104	2.27286e-102	226.31		Inositol phosphate metabolism	-0.137814	-0.00432499	-13.8566	1.37009e-41	2.3167e-40	83.5983		Butanoate metabolism	-0.139715	0.0134918	-8.58679	1.88388e-17	4.73517e-17	27.9676
Viral myocarditis	-0.179046	0.00635511	-19.94	3.41696e-80	4.53968e-79	171.834		Renal cell carcinoma	-0.137874	-0.00315541	-13.422	3.05767e-39	4.37481e-38	78.2414		Biosynthesis of unsaturated fatty acids	-0.141412	0.000269435	-9.25504	5.80721e-20	1.61215e-19	33.6779
Arachidonic acid metabolism	-0.184916	0.0168734	-16.7225	1.6217e-58	1.43636e-57	122.144		B cell receptor signaling pathway	-0.142829	-0.00264453	-13.1128	1.31606e-37	1.63191e-36	74.5158		Ascorbate and aldarate metabolism	-0.144312	0.0289132	-6.87169	8.67622e-12	1.64671e-11	15.1397
Complement and coagulation cascades	-0.191192	0.01492	-12.068	2.55643e-32	1.01169e-31	62.1935		Mismatch repair	-0.146408	-0.0109856	-7.92908	3.8118e-15	8.86243e-15	23.4664		Citrate cycle tca cycle	-0.152835	0.011445	-9.00854	5.12586e-19	1.38175e-18	31.526
Natural killer cell mediated cytotoxicity	-0.19694	-0.0022629	-22.7818	2.57641e-101	6.84589e-100	220.287		Nod like receptor signaling pathway	-0.148879	-0.000985649	-12.4745	2.47434e-34	2.09194e-33	67.0528		Dna replication	-0.158704	-0.0175088	-8.01255	1.98465e-15	4.50177e-15	23.3764
Cytokine cytokine receptor interaction	-0.215786	0.00530096	-24.5483	3.13886e-115	1.45957e-113	252.214		Chronic myeloid leukemia	-0.152812	-0.00749829	-15.2308	2.10623e-49	6.52931e-48	101.429		Nucleotide excision repair	-0.159068	-0.00900269	-12.0576	2.87448e-32	1.04834e-31	61.7593
Cell adhesion molecules cams	-0.240904	0.00717856	-26.7073	6.36648e-133	1.18417e-130	292.819		Rna degradation	-0.158634	-0.00909218	-12.045	3.31108e-32	2.46344e-31	62.2081		Steroid biosynthesis	-0.162554	-0.00273306	-8.7418	5.0998e-18	1.35509e-17	29.2572
Hematopoietic cell lineage	-0.255499	0.00409914	-26.09	8.57734e-128	7.97693e-126	281.047		Proteasome	-0.159833	0.00564972	-8.10079	9.88603e-16	2.35744e-15	24.7907		Mismatch repair	-0.165206	-0.0109856	-9.18538	1.08034e-19	2.95503e-19	33.0644
Systemic lupus erythematosus	-0.259673	0.00603061	-20.4003	1.69402e-83	2.42374e-82	179.413		Pancreatic cancer	-0.161975	-0.00614761	-16.9017	1.18214e-59	2.19878e-57	124.84		Limonene and pinene degradation	-0.180862	0.020439	-8.64613	1.14523e-17	2.918e-17	28.4587
Autoimmune thyroid disease	-0.273046	0.000794758	-20.5564	1.24936e-84	1.9365e-83	182.01		Dna replication	-0.162355	-0.0175088	-8.03032	1.72556e-15	4.0627e-15	24.244		Lysine degradation	-0.18363	0.00226498	-14.0205	1.72162e-42	7.11602e-42	85.154
Type i diabetes mellitus	-0.285805	0.00191052	-21.1789	3.40317e-89	5.75445e-88	192.48		Cell cycle	-0.174191	-0.0163342	-13.0017	4.99994e-37	5.47053e-36	73.1942		Maturity onset diabetes of the young	-0.189096	0.0133044	-13.3636	6.26336e-39	2.53257e-38	77.0004
Primary immunodeficiency	-0.289028	-0.00732149	-23.0065	4.69568e-103	1.45566e-101	224.277		Spliceosome	-0.180673	-0.0101338	-11.7017	1.49577e-30	8.97464e-30	58.4394		Peroxisome	-0.195759	0.0169236	-12.1064	1.65951e-32	6.17338e-32	62.3048
Intestinal immune network for iga production	-0.304486	0.00106914	-24.8651	8.80699e-118	5.46033e-116	258.071		Pathogenic escherichia coli infection	-0.181136	-0.00440708	-15.9185	1.58804e-53	7.38438e-52	110.843		Base excision repair	-0.204129	-0.0113058	-14.6658	4.03808e-46	1.83191e-45	93.469
Asthma	-0.304558	0.00655789	-21.9448	6.36106e-95	1.18316e-93	205.621		Fc gamma r mediated phagocytosis	-0.18715	-0.00505336	-16.0774	1.69419e-54	1.0504e-52	113.062		Terpenoid backbone biosynthesis	-0.205064	0.00275928	-11.1857	3.85144e-28	1.21418e-27	52.3281
Allograft rejection	-0.339917	-0.00221867	-22.6785	1.61152e-100	3.74679e-99	218.46		Leishmania infection	-0.191061	-0.00169564	-13.9065	7.29346e-42	1.35658e-40	84.223		Glycosylphosphatidylinositol gpi anchor biosynthesis	-0.209899	-0.00632663	-14.9481	9.51769e-48	4.5392e-47	97.1986
Graft versus host disease	-0.357074	-0.0021657	-22.2976	1.33563e-97	2.7603e-96	211.764		Ribosome	-0.207752	-0.0168535	-9.71426	8.74126e-22	2.62238e-21	38.5055		Aminoacyl trna biosynthesis	-0.22214	-0.00236756	-10.4207	9.71605e-25	2.82373e-24	44.5627

## Sheet: S4
Supplementary Table-S4: The specific Hallmark pathways of each TIME phenotype in the TCGA cohort.
Hallmark-TIME-1								Hallmark-TIME-2								Hallmark-TIME-3
Term	logFC	AveExpr	t	P.Value	adj.P.Val	B		Term	logFC	AveExpr	t	P.Value	adj.P.Val	B		Term	logFC	AveExpr	t	P.Value	adj.P.Val	B
Myc targets v2	0.260916	-0.0377046	4.58947	6.04825e-06	1.7789e-05	2.74357		Bile acid metabolism	0.314719	0.0357651	7.90868	2.86798e-14	1.43399e-12	21.7411		Allograft rejection	0.47869	0.00806776	15.9364	3.84929e-44	1.92465e-42	89.4943
Myc targets v1	0.258513	-0.0431985	4.82485	2.03269e-06	6.35217e-06	3.78988		Xenobiotic metabolism	0.265897	0.0283156	6.92879	1.82766e-11	3.04611e-10	15.4314		Interferon gamma response	0.343567	-7.40303e-05	10.7531	1.01454e-23	1.6909e-22	42.7403
G2m checkpoint	0.218871	-0.0357522	3.28247	0.00112438	0.00224876	-2.19159		Fatty acid metabolism	0.23508	0.0092057	6.65892	9.69409e-11	1.21176e-09	13.8058		Inflammatory response	0.323929	0.0248849	11.5616	1.08089e-26	2.70222e-25	49.5329
E2f targets	0.20767	-0.0354123	2.74991	0.00624623	0.0104104	-3.75936		Peroxisome	0.221344	0.00627032	7.02738	9.81478e-12	2.4537e-10	16.0377		Interferon alpha response	0.282528	-0.0110587	7.662	1.54263e-13	7.71315e-13	19.5555
Dna repair	0.201447	-0.0431779	4.39799	1.42078e-05	3.55195e-05	1.92701		Kras signaling dn	0.214228	0.0601854	5.40006	1.17728e-07	7.35802e-07	6.922		Il6 jak stat3 signaling	0.265267	0.0128304	9.59173	1.18592e-19	1.18592e-18	33.4584
Mitotic spindle	0.120136	-0.0302356	4.37427	1.57601e-05	3.75242e-05	1.82806		Coagulation	0.213961	0.0297336	5.9009	8.01544e-09	5.72532e-08	9.51824		Il2 stat5 signaling	0.222686	0.0137715	10.6535	2.31689e-23	2.89611e-22	41.9213
Unfolded protein response	0.109983	-0.0322974	5.33238	1.66797e-07	5.95705e-07	6.20176		Adipogenesis	0.17398	0.000332516	6.01086	4.33374e-09	4.33374e-08	10.114		Complement	0.206728	0.0129132	9.05735	7.14964e-18	5.95803e-17	29.403
Protein secretion	0.0917826	-0.0258841	3.52317	0.000478378	0.00101986	-1.39718		Pancreas beta cells	0.159946	0.0479581	5.90697	7.74976e-09	5.72532e-08	9.55089		Tnfa signaling via nfkb	0.196936	0.00578709	6.41297	4.24668e-10	1.93031e-09	11.7814
Wnt beta catenin signaling	0.0736659	-0.00228067	3.51685	0.000489535	0.00101986	-1.4187		Cholesterol homeostasis	0.11847	0.00471625	3.62794	0.000324761	0.00101488	-0.617517		Kras signaling up	0.190702	0.0347985	8.17736	4.40368e-15	3.14549e-14	23.0597
Mtorc1 signaling	0.029312	-0.01607	1.34345	0.179929	0.230679	-6.60179		Oxidative phosphorylation	0.0706897	-0.0308095	1.85202	0.0647988	0.124613	-5.35666		Epithelial mesenchymal transition	0.173938	0.0379487	5.48148	7.70514e-08	2.75183e-07	6.71281
Heme metabolism	0.018595	-0.00411487	1.16404	0.24514	0.298951	-6.8257		Estrogen response early	0.0659017	0.0292294	3.34484	0.000905367	0.00266284	-1.56916		Apical surface	0.162891	0.0324846	7.79101	6.42909e-14	3.57172e-13	20.4173
Spermatogenesis	0.0159185	0.0163213	0.971124	0.332105	0.395363	-7.03096		Interferon alpha response	0.0648775	-0.0110587	1.52708	0.127573	0.212622	-5.89896		Apoptosis	0.145579	-0.000750634	8.04686	1.10006e-14	6.87536e-14	22.157
Tgf beta signaling	0.00931095	-0.0158878	0.343676	0.73128	0.76332	-7.44272		Estrogen response late	0.0620691	0.0363041	3.27835	0.00114051	0.00300133	-1.7821		Angiogenesis	0.131132	0.03891	4.11072	4.83684e-05	0.00014226	0.516358
Notch signaling	0.0071591	-0.00633445	0.341671	0.732787	0.76332	-7.4434		Complement	0.0585791	0.0129132	2.17692	0.0301019	0.0627124	-4.7122		Apical junction	0.0999451	0.0248446	5.88226	8.88836e-09	3.70348e-08	8.81274
Pi3k akt mtor signaling	0.00700753	-0.0245707	0.386066	0.699664	0.760504	-7.42726		Myogenesis	0.0552601	0.0331905	2.15087	0.0321175	0.064235	-4.76763		Pi3k akt mtor signaling	0.0709456	-0.0245707	3.58263	0.000384427	0.000961068	-1.44
Glycolysis	0.00521855	0.00528108	0.317524	0.75102	0.766347	-7.45136		Heme metabolism	0.0526689	-0.00411487	2.78593	0.00560532	0.013346	-3.23261		P53 pathway	0.0667694	-0.00807747	4.36873	1.61473e-05	5.20692e-05	1.56151
Oxidative phosphorylation	0.00312932	-0.0308095	0.0973812	0.922475	0.922475	-7.497		Interferon gamma response	0.0457885	-7.40303e-05	1.16866	0.243273	0.328747	-6.37745		Hedgehog signaling	0.0667603	0.0183363	2.61336	0.00932214	0.0194211	-4.36932
Androgen response	-0.0106957	-0.00721563	-0.542843	0.587556	0.65284	-7.35451		Androgen response	0.0348992	-0.00721563	1.48813	0.137548	0.221852	-5.95706		Tgf beta signaling	0.0607874	-0.0158878	2.03337	0.0427101	0.0711835	-5.69874
Peroxisome	-0.0197237	0.00627032	-0.773262	0.439848	0.499828	-7.20312		Hypoxia	0.0339923	0.0149773	1.41217	0.15872	0.243979	-6.06609		Myogenesis	0.0580042	0.0331905	2.43283	0.0154424	0.029697	-4.81765
Uv response up	-0.0217035	0.00158837	-1.50832	0.132305	0.17879	-6.36804		Apical surface	0.0339327	0.0324846	1.40437	0.161026	0.243979	-6.07696		Coagulation	0.0505021	0.0297336	1.43762	0.151365	0.21023	-6.72513
Cholesterol homeostasis	-0.0257386	0.00471625	-0.925587	0.355249	0.41308	-7.07402		Kras signaling up	0.033852	0.0347985	1.24678	0.213246	0.304637	-6.28391		Notch signaling	0.0493682	-0.00633445	2.13665	0.0332651	0.0573536	-5.48567
Uv response dn	-0.029646	0.00577088	-1.22396	0.221725	0.277156	-6.75445		Angiogenesis	0.0313248	0.03891	0.894238	0.371761	0.453367	-6.65838		Hypoxia	0.0440063	0.0149773	1.9717	0.0493692	0.0796278	-5.82105
Hedgehog signaling	-0.0314135	0.0183363	-1.35515	0.176176	0.230679	-6.58608		Glycolysis	0.030451	0.00528108	1.55734	0.120223	0.207281	-5.8528		Reactive oxygen species pathway	0.0424772	-0.0127285	1.38652	0.166401	0.224866	-6.79697
Estrogen response early	-0.0376761	0.0292294	-2.2642	0.0241249	0.036553	-4.95655		Reactive oxygen species pathway	0.0287017	-0.0127285	0.869681	0.385024	0.458362	-6.67989		Uv response up	0.0408022	0.00158837	2.57175	0.0104984	0.0209968	-4.47541
P53 pathway	-0.0392997	-0.00807747	-2.81092	0.00519602	0.00895865	-3.59318		Uv response dn	0.0281206	0.00577088	0.972311	0.331515	0.436204	-6.58602		Kras signaling dn	0.0211298	0.0601854	0.961156	0.337086	0.411348	-7.29483
Adipogenesis	-0.0412092	0.000332516	-1.62893	0.104157	0.144662	-6.18014		Epithelial mesenchymal transition	0.0250958	0.0379487	0.708284	0.479203	0.532448	-6.80643		Wnt beta catenin signaling	0.0194713	-0.00228067	0.825496	0.409609	0.476289	-7.41587
Pancreas beta cells	-0.0463524	0.0479581	-1.9646	0.0501897	0.0716996	-5.58239		Spermatogenesis	0.00504875	0.0163213	0.2578	0.796701	0.81296	-7.02285		Uv response dn	0.0121598	0.00577088	0.451823	0.651655	0.704466	-7.65444
Estrogen response late	-0.0468234	0.0363041	-2.94344	0.00344529	0.00638016	-3.22019		Inflammatory response	0.0026877	0.0248849	0.0766994	0.938903	0.938903	-7.05299		Estrogen response late	0.00393872	0.0363041	0.22078	0.825383	0.859774	-7.73217
Reactive oxygen species pathway	-0.0546949	-0.0127285	-1.98565	0.0477906	0.0702803	-5.54124		Apoptosis	-0.00698931	-0.000750634	-0.331907	0.740143	0.770982	-7.00111		Mtorc1 signaling	0.00252795	-0.01607	0.104212	0.917056	0.917056	-7.75113
Hypoxia	-0.0596559	0.0149773	-2.98391	0.00302994	0.00582681	-3.10303		Il6 jak stat3 signaling	-0.0113847	0.0128304	-0.343415	0.731476	0.770982	-6.99724		G2m checkpoint	-0.00618752	-0.0357522	-0.151885	0.879359	0.897305	-7.74502
Apical junction	-0.0711645	0.0248446	-4.56699	6.69631e-06	1.86009e-05	2.6461		Apical junction	-0.0143222	0.0248446	-0.750428	0.453462	0.515298	-6.77587		Estrogen response early	-0.0106302	0.0292294	-0.572444	0.56736	0.6304	-7.59265
Fatty acid metabolism	-0.0797835	0.0092057	-2.57366	0.0104415	0.0168412	-4.21971		Uv response up	-0.016304	0.00158837	-0.947693	0.343889	0.440883	-6.60949		Androgen response	-0.0170182	-0.00721563	-0.77907	0.436424	0.495936	-7.45308
Bile acid metabolism	-0.0830501	0.0357651	-2.3235	0.0206799	0.0323124	-4.82246		Il2 stat5 signaling	-0.0174878	0.0137715	-0.682762	0.495174	0.538232	-6.82407		E2f targets	-0.0191744	-0.0354123	-0.437223	0.662198	0.704466	-7.66093
Myogenesis	-0.0859797	0.0331905	-4.05406	6.10917e-05	0.000138845	0.539632		P53 pathway	-0.0212962	-0.00807747	-1.26588	0.206333	0.303432	-6.26013		Spermatogenesis	-0.0239518	0.0163213	-1.31898	0.18797	0.247329	-6.88797
Xenobiotic metabolism	-0.0985107	0.0283156	-2.91784	0.00373431	0.00666842	-3.29353		Tnfa signaling via nfkb	-0.0315796	0.00578709	-0.909136	0.363855	0.453367	-6.64504		Mitotic spindle	-0.0288998	-0.0302356	-0.926615	0.354715	0.42228	-7.32739
Kras signaling dn	-0.103778	0.0601854	-5.4286	1.01514e-07	3.9044e-07	6.6825		Hedgehog signaling	-0.0325068	0.0183363	-1.17455	0.24091	0.328747	-6.37061		Glycolysis	-0.0327525	0.00528108	-1.80445	0.071954	0.109021	-6.13416
Apoptosis	-0.113407	-0.000750634	-6.80628	3.92034e-11	1.96017e-10	14.3415		Allograft rejection	-0.0343095	0.00806776	-0.822769	0.411156	0.478088	-6.71933		Myc targets v1	-0.0360272	-0.0431985	-0.960718	0.337306	0.411348	-7.29525
Angiogenesis	-0.128592	0.03891	-4.49	9.46035e-06	2.48957e-05	2.3155		Mtorc1 signaling	-0.0446308	-0.01607	-1.71688	0.0868162	0.155029	-5.59467		Myc targets v2	-0.0384225	-0.0377046	-0.962695	0.336314	0.411348	-7.29335
Tnfa signaling via nfkb	-0.137865	0.00578709	-4.87623	1.59273e-06	5.30908e-06	4.02445		Protein secretion	-0.0550525	-0.0258841	-1.74989	0.0809451	0.149898	-5.53817		Unfolded protein response	-0.0420618	-0.0322974	-1.78078	0.0757474	0.111393	-6.17625
Apical surface	-0.156238	0.0324846	-8.37677	1.06565e-15	6.66031e-15	24.6723		Notch signaling	-0.067278	-0.00633445	-2.71652	0.00689917	0.0156799	-3.41893		Dna repair	-0.0450584	-0.0431779	-1.72457	0.085419	0.122027	-6.27406
Epithelial mesenchymal transition	-0.159005	0.0379487	-5.56472	4.96812e-08	2.07005e-07	7.37513		Tgf beta signaling	-0.0835455	-0.0158878	-2.60716	0.00948952	0.0206294	-3.7033		Oxidative phosphorylation	-0.0649772	-0.0308095	-1.83078	0.0679179	0.106122	-6.08667
Il2 stat5 signaling	-0.168697	0.0137715	-8.58217	2.41596e-16	2.28498e-15	26.1353		Pi3k akt mtor signaling	-0.0920153	-0.0245707	-4.35207	1.73611e-05	7.23381e-05	2.14079		Protein secretion	-0.0653237	-0.0258841	-2.2391	0.0257279	0.0459426	-5.26413
Kras signaling up	-0.178784	0.0347985	-8.56477	2.74198e-16	2.28498e-15	26.0105		Dna repair	-0.092239	-0.0431779	-3.31614	0.00100071	0.00277975	-1.66157		Heme metabolism	-0.0684231	-0.00411487	-3.93332	9.96059e-05	0.000276683	-0.168481
Coagulation	-0.191417	0.0297336	-6.33923	6.55605e-10	2.98002e-09	11.5875		Unfolded protein response	-0.107851	-0.0322974	-4.32995	1.91086e-05	7.34948e-05	2.04977		Cholesterol homeostasis	-0.0707751	0.00471625	-2.30786	0.0215441	0.0398965	-5.1098
Il6 jak stat3 signaling	-0.207594	0.0128304	-8.08833	8.22538e-15	4.56966e-14	22.6593		Wnt beta catenin signaling	-0.127335	-0.00228067	-5.18835	3.46167e-07	1.92315e-06	5.8837		Pancreas beta cells	-0.0812769	0.0479581	-3.12959	0.00188589	0.00449021	-2.91758
Complement	-0.209187	0.0129132	-10.4633	1.10672e-22	1.84454e-21	40.5599		E2f targets	-0.131027	-0.0354123	-2.806	0.00527439	0.013186	-3.17786		Adipogenesis	-0.0997406	0.000332516	-3.60196	0.000357806	0.000941595	-1.37277
Inflammatory response	-0.265162	0.0248849	-10.1879	1.04079e-21	1.30098e-20	38.3418		Mitotic spindle	-0.137519	-0.0302356	-4.18826	3.49844e-05	0.000124944	1.47672		Fatty acid metabolism	-0.105114	0.0092057	-3.06766	0.00231217	0.00525493	-3.10489
Interferon alpha response	-0.27522	-0.0110587	-8.38919	9.74848e-16	6.66031e-15	24.7601		G2m checkpoint	-0.161983	-0.0357522	-3.76536	0.000192665	0.000642215	-0.129589		Xenobiotic metabolism	-0.10872	0.0283156	-2.90254	0.00391749	0.00851628	-3.58686
Interferon gamma response	-0.311414	-7.40303e-05	-10.8299	5.33984e-24	1.33496e-22	43.5616		Myc targets v1	-0.183882	-0.0431985	-4.68332	3.93707e-06	1.96854e-05	3.55364		Peroxisome	-0.149839	0.00627032	-5.49838	7.05171e-08	2.7122e-07	6.79881
Allograft rejection	-0.364942	0.00806776	-12.3515	1.07787e-29	5.38934e-28	56.561		Myc targets v2	-0.184531	-0.0377046	-4.40192	1.39663e-05	6.34831e-05	2.34745		Bile acid metabolism	-0.16996	0.0357651	-4.36152	1.66622e-05	5.20692e-05	1.53153

## Sheet: S5
Supplementary Table-S5: The specific KEGG pathways of each TIME phenotype in the TCGA cohort.
KEGG-TIME-1								KEGG-TIME-2								KEGG-TIME-3
Term	logFC	AveExpr	t	P.Value	adj.P.Val	B		Term	logFC	AveExpr	t	P.Value	adj.P.Val	B		Term	logFC	AveExpr	t	P.Value	adj.P.Val	B
Cell cycle	0.298473	-0.0329147	3.42621	0.000679324	0.00217852	-1.33384		Primary bile acid biosynthesis	0.409408	0.0390818	7.08012	7.06714e-12	3.9313e-10	16.5423		Primary immunodeficiency	0.553409	0.00387579	16.9547	2.37184e-48	4.41162e-46	99.2283
Dna replication	0.260917	-0.0400323	2.30166	0.0218977	0.0404333	-4.46986		Fatty acid metabolism	0.348699	0.0243532	6.72502	6.50869e-11	1.24919e-09	14.4135		Intestinal immune network for iga production	0.509494	0.0215834	14.1799	6.82033e-37	6.34291e-35	73.0661
Homologous recombination	0.25983	-0.0382023	3.6841	0.000263024	0.000905972	-0.450635		Glycine serine and threonine metabolism	0.345231	0.0298693	7.03835	9.21654e-12	3.9313e-10	16.2875		Natural killer cell mediated cytotoxicity	0.318212	0.000638212	13.581	1.72479e-34	1.06937e-32	67.5822
Mismatch repair	0.24485	-0.0426625	4.0178	7.09027e-05	0.000258586	0.780328		Butanoate metabolism	0.330772	0.0299639	6.96344	1.47952e-11	3.9313e-10	15.8335		Hematopoietic cell lineage	0.382347	0.0349095	12.9617	4.8377e-32	2.24953e-30	61.9973
Spliceosome	0.216172	-0.0421883	4.96685	1.03266e-06	5.33539e-06	4.80703		Tryptophan metabolism	0.321161	0.0394329	6.5703	1.66729e-10	2.38551e-09	13.5128		Allograft rejection	0.569016	0.00476647	12.9281	6.54881e-32	2.43616e-30	61.6973
Non homologous end joining	0.203863	-0.0443602	5.84397	1.1018e-08	7.3191e-08	9.18529		Beta alanine metabolism	0.320066	0.0245553	6.70434	7.38769e-11	1.24919e-09	14.2922		Autoimmune thyroid disease	0.548418	0.0082383	12.7162	4.39658e-31	1.36294e-29	59.811
Aminoacyl trna biosynthesis	0.165503	-0.041136	5.26972	2.3016e-07	1.25911e-06	6.24986		Retinol metabolism	0.317764	0.0595588	6.96739	1.44312e-11	3.9313e-10	15.8574		Chemokine signaling pathway	0.276002	0.00964265	12.6803	6.06666e-31	1.612e-29	59.4921
Glycosylphosphatidylinositol gpi anchor biosynthesis	0.143454	-0.0369062	5.43676	9.75599e-08	5.85359e-07	7.07711		Valine leucine and isoleucine degradation	0.310788	0.0175796	5.96278	5.69762e-09	5.20147e-08	10.1388		Type i diabetes mellitus	0.509857	0.0110109	12.5921	1.33385e-30	3.10119e-29	58.7118
Basal transcription factors	0.141326	-0.0352401	5.3311	1.68318e-07	9.7835e-07	6.55128		Drug metabolism cytochrome p450	0.300355	0.0603596	6.51542	2.31856e-10	3.08037e-09	13.1972		Graft versus host disease	0.548143	0.0109713	12.5184	2.57338e-30	5.31832e-29	58.0609
Ubiquitin mediated proteolysis	0.138251	-0.0353291	6.04928	3.50175e-09	2.5051e-08	10.2963		Peroxisome	0.295777	0.0136448	7.49707	4.69146e-13	8.72611e-11	19.1472		Leishmania infection	0.383225	0.00564548	12.4714	3.90972e-30	7.27208e-29	57.6467
Rna polymerase	0.134078	-0.0447955	4.69017	3.82006e-06	1.733e-05	3.55459		Ppar signaling pathway	0.291097	0.0358305	7.34436	1.28332e-12	1.19348e-10	18.1803		Viral myocarditis	0.367461	0.00443218	12.4244	5.93307e-30	1.00323e-28	57.2336
Nucleotide excision repair	0.131858	-0.0421358	4.64052	4.79975e-06	2.07617e-05	3.33655		Propanoate metabolism	0.289314	0.0149132	5.95737	5.87263e-09	5.20147e-08	10.1099		Asthma	0.50693	0.0281531	12.4046	7.07305e-30	1.09632e-28	57.0596
Rna degradation	0.12796	-0.0433416	4.77113	2.62172e-06	1.28326e-05	3.91447		Complement and coagulation cascades	0.288127	0.0349443	5.82797	1.20328e-08	9.32541e-08	9.42642		Cell adhesion molecules cams	0.336593	0.0311584	12.0854	1.18224e-28	1.69151e-27	54.2709
Base excision repair	0.124834	-0.0406786	4.15334	4.05421e-05	0.000163931	1.30826		Metabolism of xenobiotics by cytochrome p450	0.264832	0.0595301	5.85596	1.03143e-08	8.3411e-08	9.5732		Cytokine cytokine receptor interaction	0.319177	0.0367035	11.8639	8.19232e-28	1.08841e-26	52.3545
Thyroid cancer	0.107028	-0.0278667	5.16691	3.86198e-07	2.05237e-06	5.75177		Steroid hormone biosynthesis	0.257417	0.0688269	6.05091	3.47004e-09	3.39699e-08	10.6117		Antigen processing and presentation	0.397696	-0.0162935	11.5805	9.52744e-27	1.1814e-25	49.9261
Ribosome	0.0849253	-0.0463329	1.53486	0.125654	0.179544	-5.91983		Biosynthesis of unsaturated fatty acids	0.254843	0.0187106	6.31073	7.7845e-10	9.04948e-09	12.0389		T cell receptor signaling pathway	0.262892	-0.009515	10.9709	1.69706e-24	1.97283e-23	44.799
Circadian rhythm mammal	0.0821323	-0.0183813	2.36088	0.0187387	0.0366885	-4.33434		Starch and sucrose metabolism	0.25269	0.0570644	7.01666	1.05744e-11	3.9313e-10	16.1557		Systemic lupus erythematosus	0.390091	0.0197163	10.4554	1.21555e-22	1.32996e-21	40.576
N glycan biosynthesis	0.0772503	-0.0251221	3.19451	0.00151833	0.00415308	-2.07593		Drug metabolism other enzymes	0.248845	0.0429828	6.70799	7.2242e-11	1.24919e-09	14.3136		B cell receptor signaling pathway	0.219663	-0.00259518	9.16185	3.29892e-18	3.40889e-17	30.4975
Protein export	0.0755426	-0.0414724	2.58964	0.00997889	0.0218362	-3.77954		Ascorbate and aldarate metabolism	0.247778	0.0750129	5.01381	8.22113e-07	4.77853e-06	5.4185		Nod like receptor signaling pathway	0.22529	-0.00321251	9.10777	4.96785e-18	4.86327e-17	30.0938
Selenoamino acid metabolism	0.0719193	-0.0176913	3.28058	0.00113223	0.00329053	-1.80598		Pentose and glucuronate interconversions	0.246992	0.0686673	5.48366	7.63796e-08	5.2617e-07	7.66894		Fc gamma r mediated phagocytosis	0.209722	-0.00144096	9.0972	5.38062e-18	5.00398e-17	30.0151
Other glycan degradation	0.0682773	-0.0222387	2.16191	0.0312523	0.0538235	-4.77637		Pyruvate metabolism	0.245742	0.0187004	6.46081	3.21216e-10	3.98308e-09	12.8853		Leukocyte transendothelial migration	0.181498	0.0142372	8.71338	9.39012e-17	8.31696e-16	27.1974
Pyrimidine metabolism	0.0634539	-0.0330377	3.24309	0.00128759	0.00362867	-1.9244		Limonene and pinene degradation	0.236399	0.0141162	6.12571	2.26785e-09	2.48129e-08	11.0176		Jak stat signaling pathway	0.196779	0.00750482	8.42627	7.57075e-16	6.40073e-15	25.1425
Maturity onset diabetes of the young	0.0617719	0.0553329	1.97939	0.048497	0.0798269	-5.14845		Histidine metabolism	0.228298	0.0259484	6.08917	2.79301e-09	2.88611e-08	10.8188		Cytosolic dna sensing pathway	0.204229	-0.00907311	8.26822	2.34196e-15	1.89393e-14	24.0314
Snare interactions in vesicular transport	0.0576987	-0.0316026	2.88911	0.00408599	0.0102702	-2.97869		Folate biosynthesis	0.227218	0.012509	4.91301	1.33842e-06	7.32196e-06	4.9585		Prion diseases	0.227176	0.000893448	8.18129	4.33217e-15	3.35743e-14	23.4264
Vasopressin regulated water reabsorption	0.0535971	-0.0276078	2.42381	0.0158273	0.0323503	-4.18667		Glycolysis gluconeogenesis	0.224888	0.0318375	6.74655	5.70261e-11	1.24919e-09	14.5402		Fc epsilon ri signaling pathway	0.148624	0.00807497	7.92443	2.59913e-14	1.93375e-13	21.6652
Oocyte meiosis	0.0450901	-0.0160458	2.40761	0.0165358	0.0330716	-4.22504		Tyrosine metabolism	0.217497	0.0293559	5.81102	1.32067e-08	9.8258e-08	9.33777		Toll like receptor signaling pathway	0.178336	-0.00194831	7.71128	1.11577e-13	7.98206e-13	20.2342
Valine leucine and isoleucine biosynthesis	0.0437273	-0.0205951	1.09843	0.272717	0.335929	-6.48935		Linoleic acid metabolism	0.211972	0.0623969	5.12959	4.65094e-07	2.79056e-06	5.95689		Lysine degradation	-0.186495	-0.0197522	-6.13814	2.11236e-09	1.45518e-08	10.6005
Glycosaminoglycan biosynthesis heparan sulfate	0.0430564	0.0136415	2.00377	0.0458086	0.0762452	-5.10062		Glyoxylate and dicarboxylate metabolism	0.200148	0.00200384	5.18029	3.61234e-07	2.23965e-06	6.19598		Calcium signaling pathway	0.118803	0.0410488	5.88484	8.79273e-09	5.84088e-08	9.21361
Adherens junction	0.0420518	-0.0134801	1.97171	0.0493716	0.0800493	-5.16341		Alanine aspartate and glutamate metabolism	0.197545	0.0370778	5.00381	8.63162e-07	4.8651e-06	5.37249		Glycosylphosphatidylinositol gpi anchor biosynthesis	-0.17085	-0.0369062	-5.87302	9.3869e-09	6.02057e-08	9.15009
Endometrial cancer	0.0420353	-0.0110676	1.97066	0.0494929	0.0800493	-5.16546		Phenylalanine metabolism	0.197102	0.0370729	4.64383	4.72763e-06	2.44261e-05	3.77051		Vascular smooth muscle contraction	0.122333	0.014564	5.6832	2.64563e-08	1.64029e-07	8.1444
Erbb signaling pathway	0.0407857	-0.0029686	2.28254	0.0230126	0.0415568	-4.5129		Citrate cycle tca cycle	0.181016	-0.0180549	3.96093	8.9239e-05	0.000307379	1.0272		Neuroactive ligand receptor interaction	0.148771	0.063728	5.65005	3.16177e-08	1.89706e-07	7.9716
Chronic myeloid leukemia	0.0375537	-0.0160199	1.76222	0.0788411	0.121997	-5.54929		Steroid biosynthesis	0.18064	0.0189371	3.46391	0.000593415	0.00169808	-0.717118		Limonene and pinene degradation	-0.28428	0.0141162	-5.51965	6.32257e-08	3.67499e-07	7.30021
Regulation of autophagy	0.0349998	-0.0337291	1.28375	0.200016	0.265735	-6.27037		Lysine degradation	0.180194	-0.0197522	5.46186	8.56032e-08	5.49041e-07	7.56071		Mapk signaling pathway	0.0843925	0.00688506	5.49415	7.22918e-08	4.07463e-07	7.17049
Mtor signaling pathway	0.0347728	-0.0184269	1.82931	0.0681408	0.106506	-5.43033		Arachidonic acid metabolism	0.179418	0.0440248	5.46491	8.42518e-08	5.49041e-07	7.57582		Regulation of actin cytoskeleton	0.106096	0.00647539	5.48342	7.64765e-08	4.11854e-07	7.11603
Wnt signaling pathway	0.0334241	0.0074324	2.17433	0.0303004	0.0526718	-4.74989		Terpenoid backbone biosynthesis	0.174778	-0.00707763	3.68002	0.000267115	0.000871639	0.0146869		Dilated cardiomyopathy	0.138746	0.0464489	5.48088	7.74994e-08	4.11854e-07	7.10317
Riboflavin metabolism	0.0306076	-0.00290742	1.15989	0.246825	0.316617	-6.42047		Nitrogen metabolism	0.173943	0.0736394	4.39205	1.46005e-05	6.46594e-05	2.71331		Biosynthesis of unsaturated fatty acids	-0.205376	0.0187106	-5.39935	1.18462e-07	6.12055e-07	6.69268
Sphingolipid metabolism	0.0251241	0.00546123	1.3435	0.179916	0.242495	-6.19257		Abc transporters	0.173888	0.0363446	5.72836	2.07262e-08	1.48272e-07	8.90876		Vegf signaling pathway	0.0915617	1.52524e-05	5.38884	1.25077e-07	6.28765e-07	6.64014
Lysine degradation	0.0249328	-0.0197522	0.868829	0.385492	0.462591	-6.71366		Arginine and proline metabolism	0.173495	0.0368892	4.61601	5.36853e-06	2.62775e-05	3.65109		Maturity onset diabetes of the young	-0.180332	0.0553329	-5.37747	1.32639e-07	6.49234e-07	6.58339
Notch signaling pathway	0.0225074	-0.0180012	1.00374	0.316147	0.384335	-6.58817		Porphyrin and chlorophyll metabolism	0.171545	0.0315103	4.44515	1.15599e-05	5.24425e-05	2.93186		Glycosaminoglycan biosynthesis chondroitin sulfate	0.145182	0.00977594	5.31333	1.84344e-07	8.7918e-07	6.26527
Renal cell carcinoma	0.0193524	-0.00869967	0.906564	0.365215	0.441104	-6.68037		Galactose metabolism	0.164172	0.0346969	5.93519	6.6468e-09	5.61957e-08	9.9919		Pathogenic escherichia coli infection	0.130064	-0.0125483	5.22687	2.85871e-07	1.3293e-06	5.84164
Tight junction	0.0190542	0.00317585	1.26787	0.205626	0.271251	-6.29046		Glycerolipid metabolism	0.161736	0.0216706	6.68031	8.55586e-11	1.32616e-09	14.1516		Peroxisome	-0.193129	0.0136448	-5.07686	6.03645e-07	2.73849e-06	5.12093
Purine metabolism	0.0188603	-0.0141773	1.47989	0.139735	0.192524	-6.00185		Alpha linolenic acid metabolism	0.155961	0.0413461	4.71614	3.38759e-06	1.80026e-05	4.08382		Selenoamino acid metabolism	-0.118812	-0.0176913	-4.97358	9.99599e-07	4.4268e-06	4.63539
Steroid biosynthesis	0.0177524	0.0189371	0.399882	0.68947	0.737019	-7.00953		Renin angiotensin system	0.148853	0.0356682	4.12833	4.50005e-05	0.000174377	1.66305		Long term depression	0.0850135	0.0120547	4.96617	1.0361e-06	4.48174e-06	4.60089
Endocytosis	0.0172644	-0.0185481	1.10657	0.269183	0.333787	-6.48044		Pantothenate and coa biosynthesis	0.144614	0.00150553	4.54599	7.37223e-06	3.42809e-05	3.35342		Phosphatidylinositol signaling system	0.11451	-0.00181556	4.95171	1.11107e-06	4.69681e-06	4.5337
Tgf beta signaling pathway	0.0154108	0.00633388	0.822734	0.411178	0.481001	-6.75241		Glutathione metabolism	0.130243	0.0115528	4.07924	5.51384e-05	0.000205115	1.4741		Hypertrophic cardiomyopathy hcm	0.114108	0.04485	4.94113	1.16925e-06	4.83292e-06	4.48461
P53 signaling pathway	0.0146194	-0.0169887	0.825352	0.409693	0.481001	-6.75026		Proximal tubule bicarbonate reclamation	0.12444	0.0611535	3.53713	0.000454824	0.00135627	-0.473835		Pathways in cancer	0.071259	0.0114098	4.8054	2.23202e-06	9.02514e-06	3.8635
Terpenoid backbone biosynthesis	0.0146184	-0.00707763	0.360839	0.718422	0.76358	-7.02431		Taurine and hypotaurine metabolism	0.123122	0.0299181	3.31901	0.000991199	0.00259666	-1.18456		Aminoacyl trna biosynthesis	-0.167526	-0.041136	-4.77968	2.51887e-06	9.9683e-06	3.74749
Huntingtons disease	0.012263	-0.0349988	0.443176	0.657892	0.715602	-6.99136		Cysteine and methionine metabolism	0.120827	-0.000441667	4.15871	3.96432e-05	0.000160296	1.78103		Axon guidance	0.0963353	0.00973779	4.72552	3.24331e-06	1.25678e-05	3.50508
Glycosaminoglycan degradation	0.0121693	-0.00790691	0.445222	0.656414	0.715602	-6.99046		Maturity onset diabetes of the young	0.120649	0.0553329	3.2693	0.00117707	0.00304077	-1.34058		Glycosphingolipid biosynthesis ganglio series	0.138623	0.00230538	4.56314	6.82389e-06	2.59029e-05	2.793
Progesterone mediated oocyte maturation	0.011123	-0.00861962	0.596293	0.551336	0.617762	-6.91217		Adipocytokine signaling pathway	0.117694	0.00569836	4.63458	4.93218e-06	2.47942e-05	3.73071		Circadian rhythm mammal	-0.159627	-0.0183813	-4.20129	3.31479e-05	0.00012331	1.28692
Vibrio cholerae infection	0.00960822	-0.0114417	0.455707	0.648862	0.715602	-6.98576		Pentose phosphate pathway	0.11372	0.00728521	3.58324	0.000383775	0.0011897	-0.318169		Amyotrophic lateral sclerosis als	0.0696876	0.00296196	4.15072	4.09891e-05	0.000147281	1.08543
Insulin signaling pathway	0.00949781	-0.0181002	0.631894	0.527838	0.598646	-6.89043		Sulfur metabolism	0.108191	0.0110239	3.25027	0.0012564	0.00315797	-1.3997		Melanogenesis	0.0624132	0.0221646	4.14964	4.11753e-05	0.000147281	1.08114
Rig i like receptor signaling pathway	0.00870458	-0.0204021	0.448324	0.654176	0.715602	-6.98908		Fructose and mannose metabolism	0.103098	0.00808822	4.04557	6.33114e-05	0.000222187	1.34568		Long term potentiation	0.0777918	-0.000557633	4.06818	5.77062e-05	0.000202516	0.761325
Epithelial cell signaling in helicobacter pylori infection	0.00832557	-0.00811464	0.415442	0.678054	0.729089	-7.00321		One carbon pool by folate	0.0983294	-0.0113499	2.99356	0.00293877	0.00674829	-2.16548		Ecm receptor interaction	0.115799	0.0513805	4.05463	6.10051e-05	0.000210129	0.708707
Inositol phosphate metabolism	0.00546414	-0.00784299	0.246324	0.805565	0.837068	-7.05892		Systemic lupus erythematosus	0.0982611	0.0197163	2.17001	0.0306286	0.0542563	-4.21299		Gnrh signaling pathway	0.0757799	0.0076404	3.98746	8.01899e-05	0.000271188	0.450146
One carbon pool by folate	-0.00151361	-0.0113499	-0.0543331	0.956698	0.956698	-7.08766		Nicotinate and nicotinamide metabolism	0.0955607	0.0049368	3.21779	0.00140336	0.00348032	-1.49988		Type ii diabetes mellitus	0.0827937	0.0310131	3.96499	8.77934e-05	0.0002916	0.36458
Prostate cancer	-0.00155711	-0.00528337	-0.0882971	0.929687	0.939793	-7.08525		Neuroactive ligand receptor interaction	0.0945646	0.063728	3.25076	0.00125431	0.00315797	-1.3982		Taste transduction	0.0975286	0.0316666	3.92637	0.000102491	0.000334444	0.218486
Colorectal cancer	-0.00157974	-0.012839	-0.0777221	0.93809	0.943161	-7.08612		Circadian rhythm mammal	0.0677349	-0.0183813	1.62585	0.104815	0.161121	-5.21593		Terpenoid backbone biosynthesis	-0.169121	-0.00707763	-3.83533	0.000146895	0.000471076	-0.120678
Neurotrophin signaling pathway	-0.00214533	-0.014082	-0.109632	0.912759	0.927722	-7.08314		Amino sugar and nucleotide sugar metabolism	0.0653697	-0.00506701	2.51475	0.0123262	0.0233945	-3.43265		Histidine metabolism	-0.135699	0.0259484	-3.78438	0.00017913	0.000559704	-0.307265
Small cell lung cancer	-0.00297819	0.00232434	-0.160484	0.872585	0.89669	-7.07631		Valine leucine and isoleucine biosynthesis	0.0639357	-0.0205951	1.34738	0.178666	0.267999	-5.61952		Focal adhesion	0.0847913	0.0161645	3.78234	0.00018055	0.000559704	-0.314685
Limonene and pinene degradation	-0.00537343	0.0141162	-0.111331	0.911413	0.927722	-7.08296		Prion diseases	0.0636061	0.000893448	1.973	0.0492238	0.0839966	-4.60864		Apoptosis	0.0823691	-0.00594777	3.72052	0.000228998	0.000698257	-0.537879
Amino sugar and nucleotide sugar metabolism	-0.0054289	-0.00506701	-0.247121	0.804949	0.837068	-7.05873		Autoimmune thyroid disease	0.0590517	0.0082383	1.06704	0.286634	0.394918	-5.95012		Gap junction	0.0739329	0.0146956	3.70154	0.000246182	0.000738545	-0.605736
Oxidative phosphorylation	-0.0074546	-0.0400169	-0.190614	0.84893	0.877228	-7.07104		Calcium signaling pathway	0.0567694	0.0410488	2.52281	0.0120517	0.0231623	-3.41307		Steroid biosynthesis	-0.178046	0.0189371	-3.67899	0.000268167	0.000791732	-0.685912
Pancreatic cancer	-0.00872434	-0.00957254	-0.415337	0.678131	0.729089	-7.00326		Graft versus host disease	0.0512454	0.0109713	0.915923	0.360291	0.471931	-6.09667		Valine leucine and isoleucine degradation	-0.179884	0.0175796	-3.60907	0.000348669	0.00101332	-0.931609
Lysosome	-0.0121023	-0.0179933	-0.566203	0.571592	0.636624	-6.92958		Type ii diabetes mellitus	0.0508771	0.0310131	2.23381	0.02608	0.0475576	-4.07699		Bladder cancer	0.0719079	-0.00606266	3.45692	0.000608534	0.00173224	-1.45101
Biosynthesis of unsaturated fatty acids	-0.0121848	0.0187106	-0.342417	0.732228	0.773831	-7.03076		Parkinsons disease	0.0461951	-0.0326778	1.04993	0.294423	0.400587	-5.96783		Propanoate metabolism	-0.160622	0.0149132	-3.45413	0.000614667	0.00173224	-1.46034
Glycerophospholipid metabolism	-0.0122379	0.00766178	-0.856026	0.392526	0.468011	-6.72463		O glycan biosynthesis	0.0433629	0.0565252	1.65564	0.0986249	0.15546	-5.16834		N glycan biosynthesis	-0.0921366	-0.0251221	-3.44248	0.000640909	0.00177924	-1.49922
Proteasome	-0.0129616	-0.0389464	-0.336435	0.73673	0.77419	-7.03278		Insulin signaling pathway	0.0413084	-0.0181002	2.3185	0.020955	0.0385905	-3.89054		Nucleotide excision repair	-0.109321	-0.0421358	-3.42585	0.000680202	0.00186055	-1.55452
Bladder cancer	-0.0131278	-0.00606266	-0.689535	0.49091	0.563638	-6.85255		Asthma	0.0406695	0.0281531	0.780681	0.435479	0.554788	-6.20897		Glycine serine and threonine metabolism	-0.163348	0.0298693	-3.41923	0.00069645	0.00187739	-1.57645
Non small cell lung cancer	-0.0149068	-0.0134701	-0.845031	0.398628	0.472261	-6.73392		Allograft rejection	0.0399536	0.00476647	0.703274	0.482318	0.61028	-6.26522		Fatty acid metabolism	-0.170144	0.0243532	-3.3852	0.000785875	0.00208818	-1.6886
Nicotinate and nicotinamide metabolism	-0.0159665	0.0049368	-0.63312	0.527038	0.598646	-6.88966		Aldosterone regulated sodium reabsorption	0.0394621	0.0267948	1.7957	0.0733409	0.119661	-4.93319		Beta alanine metabolism	-0.155294	0.0245553	-3.35608	0.000870748	0.00228111	-1.7837
Alzheimers disease	-0.0165886	-0.0243463	-0.606138	0.544787	0.614124	-6.90629		Ecm receptor interaction	0.0374296	0.0513805	1.19505	0.232815	0.333105	-5.8086		Olfactory transduction	0.0734694	0.0320665	3.34611	0.00090174	0.00232949	-1.8161
Glioma	-0.0186723	-0.000792949	-1.15202	0.250042	0.318547	-6.4295		Selenoamino acid metabolism	0.0350669	-0.0176913	1.32515	0.185923	0.276653	-5.64851		Ppar signaling pathway	-0.129422	0.0358305	-3.33307	0.000943781	0.0024047	-1.85831
Gnrh signaling pathway	-0.0196895	0.0076404	-1.12739	0.260294	0.32493	-6.45736		Sphingolipid metabolism	0.0338979	0.00546123	1.52037	0.129256	0.197062	-5.3776		Epithelial cell signaling in helicobacter pylori infection	0.0718608	-0.00811464	3.27815	0.00114177	0.00286986	-2.03446
Cysteine and methionine metabolism	-0.0197799	-0.000441667	-0.79488	0.427182	0.496599	-6.7748		Other glycan degradation	0.0335208	-0.0222387	0.885171	0.376627	0.485236	-6.12378		Acute myeloid leukemia	0.0718662	-0.0171063	3.26015	0.00121459	0.00301219	-2.09157
Basal cell carcinoma	-0.0202154	0.0478988	-1.19365	0.233365	0.301429	-6.38106		Cell adhesion molecules cams	0.0335129	0.0311584	0.951235	0.342093	0.454495	-6.06442		O glycan biosynthesis	0.0783878	0.0565252	3.25239	0.00124734	0.00303453	-2.11613
Hedgehog signaling pathway	-0.0202732	0.0443975	-1.1319	0.258392	0.324736	-6.4523		Glycosaminoglycan degradation	0.0300279	-0.00790691	0.921667	0.35729	0.471319	-6.09151		Other glycan degradation	-0.112994	-0.0222387	-3.25031	0.00125623	0.00303453	-2.12268
Pathways in cancer	-0.022349	0.0114098	-1.62788	0.104383	0.153665	-5.77432		Olfactory transduction	0.0290291	0.0320665	1.21358	0.225668	0.327924	-5.78681		Melanoma	0.0571241	0.0167298	3.22049	0.00139057	0.00331597	-2.21639
Glycosaminoglycan biosynthesis keratan sulfate	-0.0247606	0.0157973	-1.14099	0.254595	0.32214	-6.44204		Alzheimers disease	0.0287847	-0.0243463	0.882115	0.378276	0.485236	-6.12642		Butanoate metabolism	-0.147645	0.0299639	-3.18898	0.00154688	0.00364203	-2.31452
Acute myeloid leukemia	-0.0249666	-0.0171063	-1.24132	0.215258	0.281957	-6.32349		Melanoma	0.0254822	0.0167298	1.32032	0.187528	0.276827	-5.65475		Pyruvate metabolism	-0.115099	0.0187004	-3.12815	0.00189561	0.00440729	-2.50141
Parkinsons disease	-0.0257598	-0.0326778	-0.697876	0.485684	0.561101	-6.84679		Vascular smooth muscle contraction	0.0244415	0.014564	1.0145	0.310993	0.419165	-6.00359		Glycosphingolipid biosynthesis globo series	0.0953776	0.0225791	3.10565	0.00204198	0.00468898	-2.56966
Arrhythmogenic right ventricular cardiomyopathy arvc	-0.0268737	0.036022	-1.31352	0.189804	0.253982	-6.23204		Viral myocarditis	0.0217393	0.00443218	0.576092	0.564896	0.667375	-6.34492		Primary bile acid biosynthesis	-0.175001	0.0390818	-3.09668	0.00210313	0.00477051	-2.59672
Pathogenic escherichia coli infection	-0.0283787	-0.0125483	-1.22392	0.221746	0.288424	-6.34476		Glycosphingolipid biosynthesis lacto and neolacto series	0.0171454	0.0426615	0.642544	0.520909	0.643703	-6.30525		Pancreatic cancer	0.0707519	-0.00957254	3.07406	0.0022651	0.00507601	-2.6647
Adipocytokine signaling pathway	-0.03246	0.00569836	-1.4877	0.137664	0.191086	-5.99038		Cytokine cytokine receptor interaction	0.0169662	0.0367035	0.500645	0.616912	0.717161	-6.38473		Arrhythmogenic right ventricular cardiomyopathy arvc	0.0678614	0.036022	3.01972	0.00270195	0.0059829	-2.82599
Mapk signaling pathway	-0.0326741	0.00688506	-2.28532	0.0228472	0.0415568	-4.50665		Oxidative phosphorylation	0.0161636	-0.0400169	0.346492	0.729166	0.821969	-6.44874		Ether lipid metabolism	0.0626269	0.0257667	2.98057	0.00306335	0.00670334	-2.94054
Phosphatidylinositol signaling system	-0.0327969	-0.00181556	-1.52895	0.127114	0.179544	-5.92879		Taste transduction	0.0158714	0.0316666	0.582524	0.560561	0.667375	-6.34127		Drug metabolism other enzymes	-0.107201	0.0429828	-2.9721	0.00314708	0.00680649	-2.96512
Axon guidance	-0.037689	0.00973779	-2.00282	0.0459111	0.0762452	-5.1025		Type i diabetes mellitus	0.0155529	0.0110109	0.299796	0.764498	0.8414	-6.46353		Endocytosis	0.0503089	-0.0185481	2.93618	0.00352612	0.00749865	-3.06864
Apoptosis	-0.0383038	-0.00594777	-1.89353	0.059051	0.093876	-5.31239		Hematopoietic cell lineage	0.0120239	0.0349095	0.315358	0.752664	0.835509	-6.45884		Cysteine and methionine metabolism	-0.0801446	-0.000441667	-2.93424	0.00354775	0.00749865	-3.07421
Pentose phosphate pathway	-0.0389	0.00728521	-1.44198	0.150137	0.204541	-6.05669		Glycerophospholipid metabolism	0.011038	0.00766178	0.646832	0.518134	0.643703	-6.30254		Sphingolipid metabolism	-0.0602248	0.00546123	-2.92974	0.00359838	0.0075202	-3.08709
Long term potentiation	-0.0390378	-0.000557633	-2.23051	0.0263001	0.0465888	-4.62824		Intestinal immune network for iga production	0.00807055	0.0215834	0.168733	0.866097	0.894967	-6.49364		Neurotrophin signaling pathway	0.0625093	-0.014082	2.91244	0.00379912	0.00785152	-3.13642
Glycosphingolipid biosynthesis lacto and neolacto series	-0.039207	0.0426615	-1.75914	0.0793635	0.121997	-5.55465		Basal cell carcinoma	0.00705103	0.0478988	0.348357	0.727766	0.821969	-6.4481		Base excision repair	-0.0979419	-0.0406786	-2.90488	0.00389002	0.00795103	-3.1579
Citrate cycle tca cycle	-0.0413289	-0.0180549	-1.05868	0.290421	0.355384	-6.53191		Antigen processing and presentation	0.0058181	-0.0162935	0.135332	0.892422	0.907051	-6.49862		Basal transcription factors	-0.0867476	-0.0352401	-2.87614	0.00425386	0.008571	-3.23902
Regulation of actin cytoskeleton	-0.042396	0.00647539	-2.35583	0.0189918	0.0367965	-4.34604		Natural killer cell mediated cytotoxicity	0.00570515	0.000638212	0.185577	0.852876	0.886228	-6.49071		Insulin signaling pathway	-0.0474063	-0.0181002	-2.87375	0.0042855	0.008571	-3.24574
Gap junction	-0.042537	0.0146956	-2.33681	0.019971	0.0375212	-4.38983		Non small cell lung cancer	0.00566269	-0.0134701	0.268829	0.788208	0.857349	-6.47216		Retinol metabolism	-0.122753	0.0595588	-2.75204	0.00620799	0.0122839	-3.5805
Dorso ventral axis formation	-0.0429447	0.0102957	-1.56876	0.117541	0.169478	-5.86778		Hedgehog signaling pathway	0.00550342	0.0443975	0.257132	0.797217	0.862107	-6.47518		One carbon pool by folate	-0.0831652	-0.0113499	-2.71766	0.00687725	0.0134649	-3.67254
Pantothenate and coa biosynthesis	-0.0446183	0.00150553	-1.63506	0.10287	0.153071	-5.76275		Melanogenesis	0.00251243	0.0221646	0.151811	0.879417	0.903711	-6.4963		Drug metabolism cytochrome p450	-0.121429	0.0603596	-2.712	0.00699339	0.0135497	-3.68758
Vegf signaling pathway	-0.0479327	1.52524e-05	-3.05149	0.00243798	0.00647807	-2.50944		Glycosphingolipid biosynthesis ganglio series	-0.00147848	0.00230538	-0.0440516	0.964887	0.964887	-6.50665		Glycerolipid metabolism	-0.0630824	0.0216706	-2.67557	0.00778479	0.0145628	-3.78371
Proximal tubule bicarbonate reclamation	-0.0485496	0.0611535	-1.62535	0.104922	0.153665	-5.77839		Ether lipid metabolism	-0.00237922	0.0257667	-0.104043	0.91719	0.922148	-6.50229		Mismatch repair	-0.108167	-0.0426625	-2.67381	0.007825	0.0145628	-3.78832
Ether lipid metabolism	-0.0492278	0.0257667	-2.591	0.00994037	0.0218362	-3.7761		N glycan biosynthesis	-0.00336715	-0.0251221	-0.115172	0.90837	0.918244	-6.5011		Steroid hormone biosynthesis	-0.1096	0.0688269	-2.67037	0.00790409	0.0145628	-3.79733
Porphyrin and chlorophyll metabolism	-0.0496707	0.0315103	-1.50127	0.134121	0.187568	-5.9703		Tight junction	-0.00349059	0.00317585	-0.194264	0.846074	0.884099	-6.48909		Tyrosine metabolism	-0.096022	0.0293559	-2.66838	0.00795004	0.0145628	-3.80252
Histidine metabolism	-0.0501594	0.0259484	-1.52772	0.127419	0.179544	-5.93065		Fc epsilon ri signaling pathway	-0.00429012	0.00807497	-0.1969	0.844011	0.884099	-6.48859		Ubiquitin mediated proteolysis	-0.0701676	-0.0353291	-2.66791	0.00796114	0.0145628	-3.80377
Amyotrophic lateral sclerosis als	-0.0508104	0.00296196	-3.32967	0.000955043	0.00296063	-1.64898		Cardiac muscle contraction	-0.00512571	0.0139887	-0.142391	0.886847	0.906338	-6.49766		Non homologous end joining	-0.106755	-0.0443602	-2.66684	0.00798607	0.0145628	-3.80657
Peroxisome	-0.0509072	0.0136448	-1.44014	0.150656	0.204541	-6.05932		Jak stat signaling pathway	-0.0062493	0.00750482	-0.228272	0.819559	0.878557	-6.48205		Rig i like receptor signaling pathway	0.0564863	-0.0204021	2.64678	0.0084662	0.0152885	-3.85879
Melanogenesis	-0.0524919	0.0221646	-3.85817	0.000134296	0.000471304	0.179187		Glycosylphosphatidylinositol gpi anchor biosynthesis	-0.00653935	-0.0369062	-0.200076	0.841529	0.884099	-6.48797		Aldosterone regulated sodium reabsorption	0.0536193	0.0267948	2.63767	0.00869254	0.0155463	-3.88237
Glutathione metabolism	-0.0533388	0.0115528	-1.96038	0.0506861	0.0812725	-5.18537		Leukocyte transendothelial migration	-0.00692328	0.0142372	-0.281975	0.778117	0.851352	-6.46861		Pentose and glucuronate interconversions	-0.112718	0.0686673	-2.61361	0.00931729	0.0165049	-3.94432
Taurine and hypotaurine metabolism	-0.0538088	0.0299181	-1.71236	0.0876516	0.131477	-5.63487		Prostate cancer	-0.00712181	-0.00528337	-0.33854	0.735144	0.823716	-6.45141		Ascorbate and aldarate metabolism	-0.122625	0.0750129	-2.60711	0.00949262	0.0166569	-3.96095
Long term depression	-0.0545309	0.0120547	-3.47677	0.000566519	0.00184864	-1.16541		Dorso ventral axis formation	-0.00713639	0.0102957	-0.217825	0.827683	0.879709	-6.48433		Adipocytokine signaling pathway	-0.0618337	0.00569836	-2.56992	0.0105548	0.0183476	-4.05538
Glycosaminoglycan biosynthesis chondroitin sulfate	-0.05773	0.00977594	-2.2759	0.0234107	0.0418692	-4.52775		Glycosphingolipid biosynthesis globo series	-0.00753554	0.0225791	-0.22529	0.821876	0.878557	-6.48271		Starch and sucrose metabolism	-0.0900514	0.0570644	-2.55129	0.0111257	0.019161	-4.10219
Focal adhesion	-0.0589099	0.0161645	-2.89227	0.00404604	0.0102702	-2.9698		Amyotrophic lateral sclerosis als	-0.00829263	0.00296196	-0.449047	0.653655	0.755154	-6.40874		Valine leucine and isoleucine biosynthesis	-0.109088	-0.0205951	-2.48659	0.0133283	0.0227437	-4.26219
Glycerolipid metabolism	-0.0623982	0.0216706	-2.94091	0.00347392	0.0089743	-2.83165		Huntingtons disease	-0.010325	-0.0349988	-0.312737	0.754653	0.835509	-6.45964		Cardiac muscle contraction	0.0822964	0.0139887	2.47871	0.0136218	0.0230332	-4.28143
Cardiac muscle contraction	-0.0632839	0.0139887	-2.10952	0.0355568	0.0606749	-4.88645		Chemokine signaling pathway	-0.0107826	0.00964265	-0.385799	0.699862	0.798616	-6.43462		Citrate cycle tca cycle	-0.105678	-0.0180549	-2.45622	0.0144901	0.0242806	-4.33594
Nitrogen metabolism	-0.063927	0.0736394	-1.8871	0.0599133	0.0944396	-5.32438		Lysosome	-0.0109383	-0.0179933	-0.428869	0.668263	0.767265	-6.41743		Metabolism of xenobiotics by cytochrome p450	-0.105034	0.0595301	-2.40992	0.0164332	0.0272221	-4.44666
Melanoma	-0.0643364	0.0167298	-4.05341	6.13104e-05	0.000233021	0.917457		Glioma	-0.012298	-0.000792949	-0.635165	0.525706	0.643703	-6.30987		Small cell lung cancer	0.0491746	0.00232434	2.40756	0.0165381	0.0272221	-4.45225
Abc transporters	-0.0667279	0.0363446	-2.53681	0.0115883	0.0244298	-3.91208		Glycosaminoglycan biosynthesis keratan sulfate	-0.0140226	0.0157973	-0.54091	0.588889	0.688889	-6.36418		Porphyrin and chlorophyll metabolism	-0.0872237	0.0315103	-2.38747	0.0174555	0.0284799	-4.4996
Aldosterone regulated sodium reabsorption	-0.071313	0.0267948	-3.93327	9.9704e-05	0.000356633	0.459197		Focal adhesion	-0.0142346	0.0161645	-0.579671	0.562482	0.667375	-6.3429		Colorectal cancer	0.0531075	-0.012839	2.3734	0.0181245	0.0293143	-4.53255
Fructose and mannose metabolism	-0.0713341	0.00808822	-3.31662	0.000999432	0.00304745	-1.69092		Endometrial cancer	-0.0162288	-0.0110676	-0.634812	0.525935	0.643703	-6.31009		Abc transporters	-0.0682627	0.0363446	-2.33679	0.0199723	0.0320245	-4.61739
Valine leucine and isoleucine degradation	-0.072222	0.0175796	-1.58556	0.113675	0.165184	-5.84157		Dilated cardiomyopathy	-0.0168785	0.0464489	-0.596887	0.550941	0.665422	-6.33297		Pantothenate and coa biosynthesis	-0.0701529	0.00150553	-2.32608	0.0205428	0.0326578	-4.64196
Glycosphingolipid biosynthesis globo series	-0.072222	0.0225791	-2.59865	0.00972543	0.0217943	-3.75668		Long term depression	-0.0207224	0.0120547	-1.09179	0.275622	0.385457	-5.924		Inositol phosphate metabolism	0.0561934	-0.00784299	2.29977	0.0220058	0.0346871	-4.70186
Propanoate metabolism	-0.0727845	0.0149132	-1.71607	0.0869686	0.131477	-5.62857		Protein export	-0.0222695	-0.0414724	-0.634656	0.526037	0.643703	-6.31019		Protein export	-0.0736901	-0.0414724	-2.27291	0.0235926	0.0368759	-4.76233
Glyoxylate and dicarboxylate metabolism	-0.0728905	0.00200384	-2.18844	0.0292493	0.0513243	-4.71962		Hypertrophic cardiomyopathy hcm	-0.0232292	0.04485	-0.907261	0.364847	0.474556	-6.1044		Nicotinate and nicotinamide metabolism	-0.0629884	0.0049368	-2.26595	0.0240195	0.0372302	-4.77788
Ascorbate and aldarate metabolism	-0.0744754	0.0750129	-1.74783	0.0813049	0.123957	-5.57423		Gap junction	-0.0249741	0.0146956	-1.14371	0.253467	0.357158	-5.86727		Glyoxylate and dicarboxylate metabolism	-0.0833884	0.00200384	-2.25803	0.0245136	0.037682	-4.79553
Tyrosine metabolism	-0.0748156	0.0293559	-2.30064	0.0219557	0.0404333	-4.47215		Primary immunodeficiency	-0.0266851	0.00387579	-0.573112	0.56691	0.667375	-6.3466		Thyroid cancer	-0.052491	-0.0278667	-2.22256	0.026837	0.0409154	-4.87382
Hypertrophic cardiomyopathy hcm	-0.0764157	0.04485	-3.61787	0.000337402	0.00114103	-0.683146		Proteasome	-0.0278122	-0.0389464	-0.605342	0.545315	0.662932	-6.32799		Tryptophan metabolism	-0.0988703	0.0394329	-2.21181	0.0275774	0.0417025	-4.8973
Sulfur metabolism	-0.0764648	0.0110239	-2.72944	0.00664084	0.0156354	-3.41615		Toll like receptor signaling pathway	-0.0280212	-0.00194831	-1.04855	0.295056	0.400587	-5.96924		Vibrio cholerae infection	0.051222	-0.0114417	2.20391	0.0281335	0.0422003	-4.91451
Galactose metabolism	-0.0770983	0.0346969	-3.22371	0.00137543	0.00381835	-1.9851		P53 signaling pathway	-0.0299088	-0.0169887	-1.41776	0.157086	0.237544	-5.52458		Notch signaling pathway	0.0537334	-0.0180012	2.17112	0.0305442	0.0454497	-4.98522
Arginine and proline metabolism	-0.0775249	0.0368892	-2.41242	0.0163225	0.0329997	-4.21367		Riboflavin metabolism	-0.0300344	-0.00290742	-0.953499	0.340947	0.454495	-6.06231		Amino sugar and nucleotide sugar metabolism	-0.0498468	-0.00506701	-2.05708	0.0403648	0.0595861	-5.22309
Pyruvate metabolism	-0.0791612	0.0187004	-2.37358	0.0181156	0.0358459	-4.30483		B cell receptor signaling pathway	-0.0327461	-0.00259518	-1.15058	0.250634	0.355861	-5.85957		Glycolysis gluconeogenesis	-0.0664488	0.0318375	-2.03657	0.0423903	0.0620834	-5.26454
Olfactory transduction	-0.0801139	0.0320665	-4.07463	5.61934e-05	0.000222382	0.999729		Long term potentiation	-0.0344156	-0.000557633	-1.64328	0.101157	0.156793	-5.18819		Rna polymerase	-0.0635093	-0.0447955	-1.95688	0.0510971	0.0742505	-5.42172
Pentose and glucuronate interconversions	-0.0819747	0.0686673	-2.10177	0.0362349	0.0612699	-4.90251		Vegf signaling pathway	-0.0376835	1.52524e-05	-1.99684	0.0465599	0.0809358	-4.56273		Dorso ventral axis formation	0.0590099	0.0102957	1.94684	0.0522941	0.0754008	-5.44109
Drug metabolism other enzymes	-0.0877603	0.0429828	-2.6933	0.00739	0.0171818	-3.51185		Erbb signaling pathway	-0.0389225	-0.0029686	-1.82125	0.0693602	0.114168	-4.88828		Tgf beta signaling pathway	0.0399642	0.00633388	1.93159	0.0541575	0.0774869	-5.47032
Taste transduction	-0.0904207	0.0316666	-4.04212	6.42099e-05	0.000238861	0.873853		Arrhythmogenic right ventricular cardiomyopathy arvc	-0.0402398	0.036022	-1.65076	0.0996185	0.155706	-5.1762		Progesterone mediated oocyte maturation	0.0394548	-0.00861962	1.91556	0.0561755	0.0797606	-5.50081
Steroid hormone biosynthesis	-0.0918357	0.0688269	-2.47877	0.0136195	0.0281469	-4.05464		Regulation of autophagy	-0.0405893	-0.0337291	-1.24779	0.212882	0.31178	-5.74569		Nitrogen metabolism	-0.071757	0.0736394	-1.90989	0.0569048	0.080184	-5.51154
O glycan biosynthesis	-0.0941851	0.0565252	-4.38199	1.52566e-05	6.44938e-05	2.23496		Apoptosis	-0.0407534	-0.00594777	-1.68702	0.0924256	0.146933	-5.1173		Glioma	0.0336087	-0.000792949	1.87527	0.061527	0.0860453	-5.57634
Alanine aspartate and glutamate metabolism	-0.0951688	0.0370778	-2.814	0.00514874	0.0124372	-3.18744		Aminoacyl trna biosynthesis	-0.0417572	-0.041136	-1.07733	0.282018	0.391458	-5.93933		Glycosaminoglycan biosynthesis keratan sulfate	0.0425909	0.0157973	1.7739	0.0768858	0.106722	-5.75938
Phenylalanine metabolism	-0.0955885	0.0370729	-2.63708	0.00870749	0.0197511	-3.6583		Leishmania infection	-0.046946	0.00564548	-1.19785	0.231727	0.333105	-5.80534		Galactose metabolism	-0.0471018	0.0346969	-1.75892	0.0794009	0.109397	-5.78557
Alpha linolenic acid metabolism	-0.0958237	0.0413461	-3.41067	0.000717992	0.0022635	-1.38513		Acute myeloid leukemia	-0.0475847	-0.0171063	-1.98937	0.0473807	0.0816001	-4.57716		Pentose phosphate pathway	-0.0504737	0.00728521	-1.68857	0.0921266	0.125997	-5.90568
Beta alanine metabolism	-0.0987279	0.0245553	-2.34918	0.0193289	0.0370636	-4.36137		Pathways in cancer	-0.050607	0.0114098	-3.11795	0.00196067	0.00479849	-1.80188		Homologous recombination	-0.0640462	-0.0382023	-1.66502	0.096738	0.131338	-5.94482
Ppar signaling pathway	-0.0993957	0.0358305	-2.82799	0.00493356	0.0120742	-3.14896		Mapk signaling pathway	-0.0511038	0.00688506	-3.0107	0.00278159	0.00654906	-2.11623		Folate biosynthesis	-0.0728644	0.012509	-1.64864	0.100053	0.134854	-5.97172
Renin angiotensin system	-0.0995827	0.0356682	-3.26814	0.00118173	0.00338157	-1.84541		Pyrimidine metabolism	-0.0513152	-0.0330377	-2.18197	0.0297275	0.0531665	-4.18779		Endometrial cancer	-0.0376865	-0.0110676	-1.59018	0.11263	0.150714	-6.06558
Folate biosynthesis	-0.100469	0.012509	-2.53378	0.0116874	0.0244298	-3.91961		Adherens junction	-0.052283	-0.0134801	-2.05571	0.0404971	0.0710609	-4.44701		Purine metabolism	0.0220312	-0.0141773	1.55974	0.119658	0.158974	-6.11312
Metabolism of xenobiotics by cytochrome p450	-0.100758	0.0595301	-2.56695	0.010644	0.0230208	-3.8368		Purine metabolism	-0.0523136	-0.0141773	-3.48491	0.000550077	0.00159866	-0.647816		Glutathione metabolism	-0.0469966	0.0115528	-1.55436	0.120935	0.159531	-6.12143
Dilated cardiomyopathy	-0.100904	0.0464489	-4.36078	1.67348e-05	6.91704e-05	2.14709		Snare interactions in vesicular transport	-0.0524644	-0.0316026	-2.19183	0.0290015	0.0523717	-4.16691		Pyrimidine metabolism	-0.0336998	-0.0330377	-1.53664	0.12522	0.16402	-6.14861
Type ii diabetes mellitus	-0.103047	0.0310131	-5.57903	4.61863e-08	2.86355e-07	7.79902		Small cell lung cancer	-0.05263	0.00232434	-2.39501	0.0171063	0.0318177	-3.71632		Arginine and proline metabolism	-0.0546391	0.0368892	-1.52587	0.127879	0.166332	-6.16497
Glycolysis gluconeogenesis	-0.104045	0.0318375	-3.57684	0.000392957	0.00130518	-0.825223		T cell receptor signaling pathway	-0.0543437	-0.009515	-1.84439	0.0659088	0.109456	-4.84705		Wnt signaling pathway	0.0252527	0.0074324	1.47652	0.140637	0.181656	-6.23849
Starch and sucrose metabolism	-0.104401	0.0570644	-3.29948	0.00106066	0.00318198	-1.74578		Axon guidance	-0.0577794	0.00973779	-2.58253	0.0101834	0.0205881	-3.26616		Spliceosome	-0.0538653	-0.0421883	-1.44905	0.148152	0.190043	-6.27838
Fc gamma r mediated phagocytosis	-0.10535	-0.00144096	-4.72415	3.26391e-06	1.55663e-05	3.70496		Colorectal cancer	-0.059168	-0.012839	-2.45945	0.0143624	0.026984	-3.56533		Proximal tubule bicarbonate reclamation	-0.0478705	0.0611535	-1.44379	0.149625	0.190619	-6.28593
Linoleic acid metabolism	-0.105889	0.0623969	-2.99047	0.00296794	0.00777518	-2.68864		Gnrh signaling pathway	-0.0596193	0.0076404	-2.88781	0.00410253	0.00908416	-2.4635		Alanine aspartate and glutamate metabolism	-0.0537266	0.0370778	-1.42121	0.156081	0.197491	-6.31806
Fatty acid metabolism	-0.106782	0.0243532	-2.33844	0.019885	0.0375212	-4.38607		Nucleotide excision repair	-0.0611944	-0.0421358	-1.76312	0.0786884	0.12634	-4.98956		Rna degradation	-0.0432468	-0.0433416	-1.41563	0.157708	0.1982	-6.32592
Glycine serine and threonine metabolism	-0.109868	0.0298693	-2.53371	0.0116895	0.0244298	-3.91977		Progesterone mediated oocyte maturation	-0.0614539	-0.00861962	-2.78832	0.00556607	0.0116325	-2.73452		Renal cell carcinoma	0.0325419	-0.00869967	1.37645	0.169499	0.211589	-6.38025
Nod like receptor signaling pathway	-0.111296	-0.00321251	-4.6462	4.67638e-06	2.07097e-05	3.36141		Regulation of actin cytoskeleton	-0.0623698	0.00647539	-2.91604	0.00375648	0.00841813	-2.38495		Complement and coagulation cascades	0.0652734	0.0349443	1.36343	0.173559	0.215213	-6.39796
Glycosphingolipid biosynthesis ganglio series	-0.111627	0.00230538	-4.0531	6.13872e-05	0.000233021	0.916276		Mtor signaling pathway	-0.0643225	-0.0184269	-2.85409	0.0045538	0.00984892	-2.55638		Glycosaminoglycan degradation	-0.0409388	-0.00790691	-1.35327	0.176778	0.217753	-6.41167
Drug metabolism cytochrome p450	-0.112398	0.0603596	-2.78601	0.0056052	0.0133662	-3.2639		Base excision repair	-0.0643593	-0.0406786	-1.76251	0.0787925	0.12634	-4.99062		Glycosphingolipid biosynthesis lacto and neolacto series	0.033414	0.0426615	1.34948	0.17799	0.217804	-6.41676
Butanoate metabolism	-0.112469	0.0299639	-2.68429	0.00758824	0.0174248	-3.53552		Bladder cancer	-0.0644781	-0.00606266	-2.8676	0.00436787	0.00955792	-2.5193		Linoleic acid metabolism	-0.0530117	0.0623969	-1.33717	0.181972	0.221221	-6.43319
Cytosolic dna sensing pathway	-0.115237	-0.00907311	-4.91125	1.34969e-06	6.78495e-06	4.55028		Renal cell carcinoma	-0.0651689	-0.00869967	-2.57852	0.0103	0.0206001	-3.27611		Vasopressin regulated water reabsorption	0.0324207	-0.0276078	1.31477	0.189383	0.228736	-6.4627
Vascular smooth muscle contraction	-0.116604	0.014564	-6.03814	3.72952e-09	2.56922e-08	10.2352		Glycosaminoglycan biosynthesis heparan sulfate	-0.0678429	0.0136415	-2.65699	0.00821867	0.0167986	-3.07833		Phenylalanine metabolism	-0.0528265	0.0370729	-1.30486	0.192734	0.23128	-6.4756
Fc epsilon ri signaling pathway	-0.117779	0.00807497	-6.83611	3.27871e-11	2.541e-10	14.8398		Tgf beta signaling pathway	-0.068144	0.00633388	-3.0847	0.00218751	0.00521638	-1.90045		Tight junction	-0.0204257	0.00317585	-1.22554	0.221136	0.263662	-6.57537
Ecm receptor interaction	-0.120421	0.0513805	-4.71069	3.47416e-06	1.61548e-05	3.64529		Neurotrophin signaling pathway	-0.0692359	-0.014082	-3.00072	0.00287219	0.00667785	-2.14495		Taurine and hypotaurine metabolism	-0.0402599	0.0299181	-1.15262	0.249795	0.295935	-6.66161
Retinol metabolism	-0.123557	0.0595588	-3.0803	0.00221927	0.00598237	-2.42362		Pancreatic cancer	-0.0694068	-0.00957254	-2.79751	0.00541339	0.0114419	-2.70988		Snare interactions in vesicular transport	-0.025625	-0.0316026	-1.14635	0.252374	0.297099	-6.66878
Toll like receptor signaling pathway	-0.125249	-0.00194831	-5.82895	1.19674e-08	7.67564e-08	9.10524		Cytosolic dna sensing pathway	-0.0722103	-0.00907311	-2.522	0.0120792	0.0231623	-3.41505		Chronic myeloid leukemia	0.0265223	-0.0160199	1.11943	0.263668	0.308441	-6.69913
Tryptophan metabolism	-0.1313	0.0394329	-3.28312	0.00112237	0.00329053	-1.79792		Inositol phosphate metabolism	-0.0727593	-0.00784299	-2.77701	0.00575941	0.0119028	-2.76475		Lysosome	0.0243491	-0.0179933	1.02813	0.304547	0.354036	-6.79671
Calcium signaling pathway	-0.136454	0.0410488	-7.71952	1.05493e-13	1.03272e-12	20.4476		Vibrio cholerae infection	-0.0729065	-0.0114417	-2.93035	0.00359152	0.00814662	-2.34487		Hedgehog signaling pathway	0.0201851	0.0443975	1.0159	0.310329	0.358517	-6.80916
Leukocyte transendothelial migration	-0.142647	0.0142372	-7.41808	7.90832e-13	7.00451e-12	18.4768		Wnt signaling pathway	-0.0767616	0.0074324	-4.25797	2.60622e-05	0.000107724	2.17198		Basal cell carcinoma	0.0187757	0.0478988	0.999159	0.318357	0.365521	-6.82595
Primary bile acid biosynthesis	-0.1455	0.0390818	-2.85058	0.00460332	0.0114162	-3.08644		Rig i like receptor signaling pathway	-0.0777087	-0.0204021	-3.40489	0.000732895	0.0020346	-0.90977		Proteasome	0.0399976	-0.0389464	0.936899	0.349409	0.398712	-6.88597
Arachidonic acid metabolism	-0.145602	0.0440248	-5.27766	2.21066e-07	1.24601e-06	6.28868		Mismatch repair	-0.081015	-0.0426625	-1.85307	0.0646518	0.108335	-4.83145		Erbb signaling pathway	-0.0165254	-0.0029686	-0.829	0.407628	0.46231	-6.98088
B cell receptor signaling pathway	-0.155517	-0.00259518	-6.90605	2.12044e-11	1.71479e-10	15.2649		Oocyte meiosis	-0.0811237	-0.0160458	-3.66673	0.000280877	0.000900744	-0.0315172		Dna replication	-0.0354586	-0.0400323	-0.760952	0.44716	0.503338	-7.0348
Jak stat signaling pathway	-0.15554	0.00750482	-7.23142	2.67509e-12	2.26167e-11	17.2858		Endocytosis	-0.0827444	-0.0185481	-4.55833	6.97338e-06	3.32577e-05	3.4056		Arachidonic acid metabolism	0.0240011	0.0440248	0.757512	0.449216	0.503338	-7.0374
T cell receptor signaling pathway	-0.175472	-0.009515	-7.59356	2.46481e-13	2.29228e-12	19.617		Chronic myeloid leukemia	-0.0841058	-0.0160199	-3.343	0.000911615	0.00242229	-1.10847		Oocyte meiosis	0.0146709	-0.0160458	0.701455	0.483451	0.538455	-7.07817
Neuroactive ligand receptor interaction	-0.187373	0.063728	-8.2304	3.06127e-15	3.16331e-14	23.9158		Glycosaminoglycan biosynthesis chondroitin sulfate	-0.0857514	0.00977594	-2.84446	0.00469072	0.0100284	-2.58271		Non small cell lung cancer	0.0134445	-0.0134701	0.687026	0.492488	0.545254	-7.08816
Chemokine signaling pathway	-0.216742	0.00964265	-10.5171	7.32681e-23	9.73419e-22	41.1695		Phosphatidylinositol signaling system	-0.0857584	-0.00181556	-3.39125	0.000769222	0.00207356	-0.953859		Ribosome	0.0404649	-0.0463329	0.657615	0.511186	0.562607	-7.10788
Prion diseases	-0.229339	0.000893448	-9.37384	6.53234e-19	7.14715e-18	32.2168		Thyroid cancer	-0.0915843	-0.0278667	-3.64404	0.000305925	0.000964442	-0.110039		Mtor signaling pathway	0.0128368	-0.0184269	0.606541	0.54452	0.595768	-7.14007
Complement and coagulation cascades	-0.255547	0.0349443	-6.19964	1.48346e-09	1.10369e-08	11.1299		Fc gamma r mediated phagocytosis	-0.0926311	-0.00144096	-3.43574	0.000656574	0.00185035	-0.809468		Alpha linolenic acid metabolism	-0.016962	0.0413461	-0.53632	0.592053	0.643987	-7.1801
Natural killer cell mediated cytotoxicity	-0.262636	0.000638212	-11.968	3.30159e-28	1.02349e-26	53.3057		Notch signaling pathway	-0.0941648	-0.0180012	-3.57422	0.000396793	0.00120989	-0.348759		Prostate cancer	0.00807424	-0.00528337	0.412952	0.679876	0.735215	-7.23852
Cytokine cytokine receptor interaction	-0.271334	0.0367035	-10.9623	1.82128e-24	2.60584e-23	44.8101		Epithelial cell signaling in helicobacter pylori infection	-0.0949491	-0.00811464	-4.0559	6.06881e-05	0.000217573	1.38499		P53 signaling pathway	0.00787519	-0.0169887	0.400635	0.688916	0.737944	-7.24352
Leishmania infection	-0.278472	0.00564548	-9.39708	5.46293e-19	6.35065e-18	32.3926		Dna replication	-0.0957211	-0.0400323	-1.91788	0.0558795	0.0944872	-4.71275		Riboflavin metabolism	-0.011688	-0.00290742	-0.398707	0.690334	0.737944	-7.24429
Cell adhesion molecules cams	-0.297118	0.0311584	-11.7392	2.41808e-27	4.99737e-26	51.3416		Basal transcription factors	-0.100771	-0.0352401	-3.11203	0.00199941	0.00482974	-1.8195		Cell cycle	-0.012285	-0.0329147	-0.379581	0.704469	0.74875	-7.25172
Viral myocarditis	-0.313932	0.00443218	-11.5354	1.40266e-26	2.37178e-25	49.6078		Nod like receptor signaling pathway	-0.102174	-0.00321251	-3.5344	0.000459382	0.00135627	-0.482967		Glycerophospholipid metabolism	0.00551266	0.00766178	0.347483	0.728422	0.769809	-7.26337
Hematopoietic cell lineage	-0.319202	0.0349095	-11.6394	5.73026e-27	1.06583e-25	50.4907		Homologous recombination	-0.105193	-0.0382023	-2.55527	0.0110015	0.021645	-3.33363		Adherens junction	-0.00653001	-0.0134801	-0.274682	0.783711	0.823561	-7.28597
Antigen processing and presentation	-0.327316	-0.0162935	-10.2726	5.37882e-22	6.66973e-21	39.206		Pathogenic escherichia coli infection	-0.110032	-0.0125483	-4.05535	6.08267e-05	0.000217573	1.38287		Regulation of autophagy	-0.007965	-0.0337291	-0.262845	0.792814	0.828446	-7.28915
Systemic lupus erythematosus	-0.386103	0.0197163	-11.8357	1.04628e-27	2.78012e-26	52.1679		Vasopressin regulated water reabsorption	-0.113755	-0.0276078	-4.38648	1.49603e-05	6.47121e-05	2.69054		Glycosaminoglycan biosynthesis heparan sulfate	0.00568894	0.0136415	0.237472	0.812419	0.84419	-7.29548
Intestinal immune network for iga production	-0.419762	0.0215834	-12.4249	5.90101e-30	3.65863e-28	57.2763		Ubiquitin mediated proteolysis	-0.11557	-0.0353291	-4.13799	4.32251e-05	0.000171061	1.70051		Parkinsons disease	-0.00825114	-0.0326778	-0.201405	0.84049	0.864301	-7.30338
Type i diabetes mellitus	-0.425316	0.0110109	-11.3151	9.23741e-26	1.4318e-24	47.7492		Rna polymerase	-0.117332	-0.0447955	-3.39512	0.000758752	0.00207356	-0.941371		Huntingtons disease	-0.00616002	-0.0349988	-0.200666	0.841067	0.864301	-7.30353
Primary immunodeficiency	-0.431028	0.00387579	-13.4105	8.19654e-34	1.52456e-31	66.0426		Cell cycle	-0.125909	-0.0329147	-3.68065	0.000266481	0.000871639	0.0168744		Renin angiotensin system	-0.00619077	0.0356682	-0.180642	0.856745	0.875575	-7.30734
Asthma	-0.44059	0.0281531	-11.7907	1.5471e-27	3.59702e-26	51.7821		Rna degradation	-0.132058	-0.0433416	-4.09651	5.13463e-05	0.000194906	1.54035		Alzheimers disease	-0.0044803	-0.0243463	-0.147528	0.882794	0.897266	-7.31277
Graft versus host disease	-0.481518	0.0109713	-12.0723	1.32559e-28	4.93121e-27	54.2059		Non homologous end joining	-0.166617	-0.0443602	-3.91104	0.00010895	0.000368449	0.84234		Oxidative phosphorylation	-0.00480489	-0.0400169	-0.110758	0.911867	0.921779	-7.31751
Autoimmune thyroid disease	-0.487227	0.0082383	-12.4548	4.5234e-30	3.65863e-28	57.5387		Ribosome	-0.167634	-0.0463329	-2.55354	0.0110553	0.021645	-3.33788		Fructose and mannose metabolism	-0.00138236	0.00808822	-0.0571246	0.954476	0.959635	-7.322
Allograft rejection	-0.490546	0.00476647	-12.1353	7.62368e-29	3.54501e-27	54.7517		Spliceosome	-0.167814	-0.0421883	-4.28647	2.30703e-05	9.75245e-05	2.28578		Sulfur metabolism	0.000526574	0.0110239	0.0167815	0.98662	0.98662	-7.32349

## Sheet: S6
Supplementary Table-S6: The difference of chemokines, ILs, IFNs, and other important cytokines and their receptors among three TIME phenotypes in the expression, CNV and mutation level.
		Expression difference			CNV difference											Mutation difference
Class	Gene.ID	P.value	P.adjust		TIME-1-AMP	TIME-2-AMP	TIME-3-AMP	AMP_P.value	AMP_P.adjust	TIME-1-DEL	TIME-2-DEL	TIME-3-DEL	DEL_P.value	DEL_P.adjust		TIME-1-Frequency	TIME-2-Frequency	TIME-3-Frequency	P.value	P.adjust
Chemokines and receptors	ACKR3	0.846428	0.846428		0.0175439	0.047619	0.0485437	0.237314	0.760498	0.0467836	0.0119048	0.0485437	0.338512	0.965101		0.0115607	0	0.00970874	1	1
Other cytokines	ARG1	7.86507e-06	1.55628e-05		0.0526316	0	0.0291262	0.0806918	0.760498	0.239766	0.178571	0.174757	0.33514	0.965101		0	0	0.0194175	0.134701	0.922203
Chemokines and receptors	CCL11	2.43874e-07	6.12981e-07		0.111111	0.154762	0.0970874	0.446665	0.760498	0.0175439	0.0238095	0.0194175	0.94389	0.965101		0.00578035	0.0120482	0	0.491184	0.926612
Chemokines and receptors	CCL14	0.000705925	0.00119366		0.111111	0.130952	0.0776699	0.474955	0.760498	0.0175439	0.0357143	0.0291262	0.652909	0.965101		0.00578035	0	0	1	1
Chemokines and receptors	CCL16	2.26897e-05	4.30642e-05		0.111111	0.130952	0.0776699	0.474955	0.760498	0.0175439	0.0357143	0.0291262	0.652909	0.965101		0	0.0120482	0	0.231198	0.922203
Chemokines and receptors	CCL17	3.80433e-08	1.07213e-07		0.00584795	0	0.00970874	1	1	0.222222	0.22619	0.242718	0.924037	0.965101		0.00578035	0	0	1	1
Chemokines and receptors	CCL18	3.87574e-11	1.38632e-10		0.111111	0.130952	0.0776699	0.474955	0.760498	0.0175439	0.0357143	0.0291262	0.652909	0.965101		0	0.0120482	0	0.231198	0.922203
Chemokines and receptors	CCL25	2.61423e-05	4.86247e-05		0.0233918	0	0.0291262	0.36943	0.760498	0.0526316	0.0595238	0.15534	0.00792892	0.298348		0.00578035	0	0	1	1
Chemokines and receptors	CCL3	4.07138e-11	1.40237e-10		0.105263	0.130952	0.0776699	0.489397	0.760498	0.0175439	0.0357143	0.0291262	0.652909	0.965101		0.00578035	0	0	1	1
Chemokines and receptors	CCL8	2.71188e-06	5.86523e-06		0.111111	0.154762	0.0970874	0.446665	0.760498	0.0175439	0.0238095	0.0194175	0.94389	0.965101		0.0115607	0.0120482	0	0.6062	1
Chemokines and receptors	CCR1	1.21777e-11	4.92403e-11		0.0409357	0.0238095	0.00970874	0.346169	0.760498	0.0350877	0.0595238	0.0291262	0.527716	0.965101		0.0115607	0	0	0.722709	1
Chemokines and receptors	CCR10	0.00411803	0.00617705		0.122807	0.142857	0.0873786	0.469133	0.760498	0.0175439	0.0238095	0.00970874	0.751838	0.965101		0	0.0120482	0.00970874	0.267736	0.922203
Chemokines and receptors	CCR2	5.49071e-19	3.92797e-18		0.0350877	0.0238095	0.00970874	0.46067	0.760498	0.0409357	0.0595238	0.038835	0.751236	0.965101		0.00578035	0.0240964	0.00970874	0.355689	0.926612
Chemokines and receptors	CCR3	7.55236e-05	0.000132523		0.0409357	0.0238095	0.00970874	0.346169	0.760498	0.0350877	0.0595238	0.0291262	0.527716	0.965101		0.017341	0.0120482	0	0.459111	0.926612
Chemokines and receptors	CCR4	1.50924e-11	5.84831e-11		0.0584795	0.0238095	0.0485437	0.503727	0.760498	0.0350877	0.0238095	0.0194175	0.722508	0.965101		0.00578035	0	0.00970874	1	1
Chemokines and receptors	CCR5	4.90145e-25	1.13959e-23		0.0350877	0.0238095	0.00970874	0.46067	0.760498	0.0409357	0.0595238	0.038835	0.751236	0.965101		0.0115607	0.0240964	0.00970874	0.715724	1
Chemokines and receptors	CCR6	1.28803e-07	3.42248e-07		0.0409357	0.0357143	0.0485437	0.888673	0.929984	0.280702	0.202381	0.194175	0.182433	0.965101		0.0115607	0.0361446	0.00970874	0.36907	0.926612
Chemokines and receptors	CCR7	2.8608e-22	3.80078e-21		0.122807	0.142857	0.0970874	0.614436	0.804825	0.0233918	0.0119048	0.0194175	0.823718	0.965101		0.0115607	0.0240964	0.00970874	0.715724	1
Chemokines and receptors	CCR8	1.02695e-09	3.18356e-09		0.0584795	0.0357143	0.0291262	0.506999	0.760498	0.0350877	0.0238095	0.0291262	0.88117	0.965101		0	0.0240964	0	0.0529559	0.922203
Chemokines and receptors	CCR9	0.000893949	0.00148459		0.0409357	0.0357143	0.00970874	0.374891	0.760498	0.0350877	0.0595238	0.0291262	0.527716	0.965101		0.0115607	0	0.00970874	1	1
Other cytokines	CSF1	4.68854e-05	8.38528e-05		0.0409357	0.047619	0.0679612	0.63468	0.808565	0.0818713	0.0714286	0.0873786	0.922465	0.965101		0.00578035	0	0.00970874	1	1
Other cytokines	CSF2	0.00547201	0.00807772		0.146199	0.119048	0.135922	0.865369	0.929984	0.0175439	0.0119048	0.0582524	0.0836756	0.965101		0	0	0.00970874	0.518106	0.926612
Other cytokines	CSF2RB	1.62586e-14	7.95816e-14		0.0701754	0.0119048	0.0582524	0.113171	0.760498	0.0760234	0.0357143	0.0679612	0.45941	0.965101		0.0231214	0.0120482	0	0.37479	0.926612
Chemokines and receptors	CX3CL1	0.290444	0.31778		0.00584795	0	0.00970874	1	1	0.222222	0.214286	0.242718	0.885105	0.965101		0	0	0.00970874	0.518106	0.926612
Chemokines and receptors	CX3CR1	0.0144599	0.0194895		0.0643275	0.0357143	0.0291262	0.402016	0.760498	0.0350877	0.0238095	0.0291262	0.88117	0.965101		0.00578035	0	0	1	1
Chemokines and receptors	CXCL12	2.0801e-06	4.71827e-06		0.0467836	0.0833333	0.0194175	0.127289	0.760498	0.0350877	0.047619	0.038835	0.888836	0.965101		0	0.0240964	0	0.0529559	0.922203
Chemokines and receptors	CXCL13	1.84686e-11	6.87031e-11		0.0116959	0.0357143	0	0.113857	0.760498	0.181287	0.238095	0.262136	0.255505	0.965101		0.00578035	0	0	1	1
Chemokines and receptors	CXCL14	1.06413e-09	3.1924e-09		0.140351	0.119048	0.135922	0.919483	0.939691	0.0175439	0.0119048	0.0582524	0.0836756	0.965101		0.0115607	0	0	0.722709	1
Chemokines and receptors	CXCL16	1.10539e-07	3.02357e-07		0.0116959	0.0238095	0	0.268834	0.760498	0.432749	0.416667	0.427184	0.970664	0.970664		0.00578035	0	0	1	1
Chemokines and receptors	CXCL2	0.0146998	0.0195297		0.0116959	0.0119048	0	0.607473	0.804825	0.169591	0.25	0.252427	0.167712	0.965101		0	0	0.00970874	0.518106	0.926612
Chemokines and receptors	CXCL6	0.129577	0.154496		0.0175439	0.0119048	0	0.462262	0.760498	0.169591	0.25	0.252427	0.167712	0.965101		0.00578035	0.0120482	0	0.491184	0.926612
Chemokines and receptors	CXCR2	0.00183593	0.00284569		0.0175439	0.0595238	0.0485437	0.13628	0.760498	0.0292398	0.0238095	0.0291262	0.966206	0.970664		0.00578035	0.0120482	0.0194175	0.569938	0.981561
Chemokines and receptors	CXCR3	3.19367e-27	1.48506e-25		0.0292398	0.0357143	0.038835	0.866487	0.929984	0.00584795	0.0238095	0.00970874	0.433241	0.965101		0.0115607	0.0120482	0.00970874	1	1
Chemokines and receptors	CXCR4	6.77718e-16	3.50154e-15		0.0116959	0.0238095	0.0291262	0.541611	0.787029	0.0292398	0.0357143	0.038835	0.905289	0.965101		0	0.0120482	0.00970874	0.267736	0.922203
Chemokines and receptors	CXCR6	2.29063e-29	2.13028e-27		0.0409357	0.0357143	0.00970874	0.374891	0.760498	0.0350877	0.0595238	0.0291262	0.527716	0.965101		0.00578035	0.0120482	0.00970874	0.799605	1
Other cytokines	EGF	0.0870637	0.109418		0.0116959	0.0238095	0.00970874	0.716721	0.888734	0.192982	0.25	0.262136	0.348303	0.965101		0.0231214	0.0361446	0.0194175	0.751331	1
Other cytokines	EGFR	0.232447	0.260453		0.152047	0.130952	0.126214	0.8332	0.922471	0	0.0119048	0	0.194851	0.965101		0.017341	0.0120482	0.0291262	0.697387	1
Other cytokines	EPOR	0.0129506	0.0177119		0.0292398	0	0.0291262	0.295063	0.760498	0.0467836	0.0595238	0.145631	0.00983566	0.298348		0.00578035	0.0120482	0	0.491184	0.926612
Other cytokines	FAS	0.0890367	0.110405		0.0292398	0.0714286	0	0.0170405	0.760498	0.111111	0.0833333	0.0970874	0.778873	0.965101		0.00578035	0	0	1	1
Other cytokines	FASLG	2.66764e-21	2.48091e-20		0.549708	0.666667	0.601942	0.200898	0.760498	0.00584795	0	0	0.577923	0.965101		0	0.0120482	0.00970874	0.267736	0.922203
Other cytokines	IDO1	2.37095e-14	1.10249e-13		0.0584795	0.0833333	0.0873786	0.583409	0.804825	0.421053	0.380952	0.349515	0.489544	0.965101		0.00578035	0.0240964	0	0.214979	0.922203
Interferons and receptors	IFNAR1	0.319726	0.334096		0.0350877	0.0357143	0.00970874	0.416607	0.760498	0.0701754	0.142857	0.126214	0.133548	0.965101		0.017341	0	0	0.325878	0.926612
Interferons and receptors	IFNAR2	0.011746	0.0165512		0.0350877	0.0238095	0.00970874	0.46067	0.760498	0.0701754	0.142857	0.126214	0.133548	0.965101		0.00578035	0	0.0194175	0.444717	0.926612
Interferons and receptors	IFNG	2.86541e-13	1.21129e-12		0.0584795	0.0595238	0.0291262	0.517412	0.763799	0.00584795	0	0.00970874	0.673998	0.965101		0.00578035	0.0240964	0.00970874	0.355689	0.926612
Interferons and receptors	IFNGR1	0.299377	0.321791		0.0409357	0	0.0291262	0.178659	0.760498	0.239766	0.190476	0.174757	0.390598	0.965101		0.00578035	0.0120482	0	0.491184	0.926612
Interferons and receptors	IFNGR2	4.3777e-06	8.85057e-06		0.0233918	0.0238095	0.00970874	0.78599	0.891428	0.0701754	0.142857	0.126214	0.133548	0.965101		0.00578035	0	0	1	1
Interferons and receptors	IFNLR1	0.0013047	0.00205657		0.0292398	0.0119048	0.0291262	0.752842	0.891428	0.210526	0.202381	0.145631	0.392637	0.965101		0.00578035	0	0	1	1
Interleukins and receptors	IL10	4.95458e-11	1.64563e-10		0.51462	0.595238	0.631068	0.14375	0.760498	0.0116959	0	0	0.332967	0.965101		0.00578035	0.0120482	0	0.491184	0.926612
Interleukins and receptors	IL10RA	3.66893e-19	2.84342e-18		0.0233918	0.0119048	0.00970874	0.871118	0.929984	0.105263	0.0833333	0.0970874	0.857328	0.965101		0.0115607	0.0240964	0.00970874	0.715724	1
Interleukins and receptors	IL10RB	0.048851	0.0630992		0.0292398	0.0238095	0.00970874	0.652019	0.819429	0.0701754	0.142857	0.126214	0.133548	0.965101		0.0115607	0	0	0.722709	1
Interleukins and receptors	IL11	0.2294	0.260174		0.0526316	0.0357143	0.126214	0.0395918	0.760498	0.0233918	0.0357143	0.00970874	0.48466	0.965101		0	0.0120482	0	0.231198	0.922203
Interleukins and receptors	IL12A	0.0011935	0.00191372		0.0701754	0.0833333	0.038835	0.44589	0.760498	0.00584795	0.0119048	0	0.553122	0.965101		0	0.0240964	0.00970874	0.0809777	0.922203
Interleukins and receptors	IL12B	2.16825e-13	9.60225e-13		0.134503	0.154762	0.174757	0.632257	0.808565	0.0116959	0.0119048	0.0291262	0.511168	0.965101		0	0.0240964	0	0.0529559	0.922203
Interleukins and receptors	IL12RB1	3.24069e-26	1.00461e-24		0.0409357	0.0357143	0.0970874	0.124619	0.760498	0.0233918	0.047619	0.0485437	0.457726	0.965101		0.017341	0.0240964	0.00970874	0.762233	1
Interleukins and receptors	IL12RB2	0.0121464	0.01686		0.0350877	0.0357143	0.0679612	0.448296	0.760498	0.105263	0.0833333	0.0679612	0.563196	0.965101		0.0231214	0.0120482	0.0194175	1	1
Interleukins and receptors	IL16	1.03169e-24	1.91895e-23		0.0409357	0.0595238	0.0679612	0.558411	0.798958	0.0643275	0.047619	0.0582524	0.867091	0.965101		0.0115607	0.0361446	0	0.112275	0.922203
Interleukins and receptors	IL17D	0.00814924	0.0118419		0.0350877	0.0119048	0.00970874	0.415339	0.760498	0.169591	0.154762	0.203883	0.649867	0.965101		0	0.0120482	0	0.231198	0.922203
Interleukins and receptors	IL17RD	3.73372e-06	7.71635e-06		0.0350877	0.0238095	0.0194175	0.915643	0.939691	0.0526316	0.0833333	0.0776699	0.574011	0.965101		0.0231214	0	0.0194175	0.488084	0.926612
Interleukins and receptors	IL18	1.27828e-16	7.43003e-16		0.0292398	0.0119048	0	0.198581	0.760498	0.111111	0.0833333	0.0873786	0.715478	0.965101		0.00578035	0	0	1	1
Interleukins and receptors	IL1B	2.41654e-07	6.12981e-07		0.0116959	0.0357143	0.00970874	0.37204	0.760498	0.0409357	0.0119048	0.0194175	0.343938	0.965101		0	0.0120482	0	0.231198	0.922203
Interleukins and receptors	IL1R1	0.0943195	0.115417		0.0116959	0.0357143	0.0291262	0.370884	0.760498	0.0233918	0.0119048	0.0194175	0.823718	0.965101		0.0115607	0	0.0291262	0.25316	0.922203
Interleukins and receptors	IL20RA	0.000329217	0.000566986		0.0350877	0	0.0291262	0.226009	0.760498	0.239766	0.178571	0.174757	0.33514	0.965101		0.017341	0	0	0.325878	0.926612
Interleukins and receptors	IL20RB	0.0336815	0.0441181		0.0526316	0.0714286	0.0291262	0.422384	0.760498	0.00584795	0	0	0.577923	0.965101		0	0.0240964	0	0.0529559	0.922203
Interleukins and receptors	IL21R	3.0725e-21	2.59766e-20		0.0292398	0.0357143	0.0582524	0.466811	0.760498	0.111111	0.0833333	0.106796	0.783673	0.965101		0.0289017	0.0120482	0	0.196132	0.922203
Interleukins and receptors	IL23A	0.161913	0.188223		0.0701754	0.047619	0.0194175	0.190094	0.760498	0	0.0119048	0.00970874	0.390762	0.965101		0	0.0120482	0.00970874	0.267736	0.922203
Interleukins and receptors	IL24	1.42468e-24	2.20826e-23		0.51462	0.595238	0.631068	0.14375	0.760498	0.0116959	0	0	0.332967	0.965101		0	0.0120482	0	0.231198	0.922203
Interleukins and receptors	IL27RA	1.50566e-10	4.82848e-10		0.0584795	0.0119048	0.0873786	0.0584526	0.760498	0.0409357	0.0357143	0.126214	0.009745	0.298348		0.0115607	0	0	0.722709	1
Interleukins and receptors	IL2RA	2.95755e-18	1.96466e-17		0.0760234	0.130952	0.0485437	0.109391	0.760498	0.0116959	0.047619	0.0291262	0.216552	0.965101		0	0.0120482	0.00970874	0.267736	0.922203
Interleukins and receptors	IL2RB	6.85161e-18	4.248e-17		0.0701754	0.0119048	0.0679612	0.113255	0.760498	0.0760234	0.0357143	0.0679612	0.45941	0.965101		0.00578035	0.0120482	0.0291262	0.198708	0.922203
Interleukins and receptors	IL2RG	1.62465e-21	1.762e-20		0.0175439	0.0357143	0.038835	0.497075	0.760498	0.00584795	0.0238095	0.00970874	0.433241	0.965101		0.00578035	0	0.00970874	1	1
Interleukins and receptors	IL31RA	0.142315	0.167536		0.105263	0.0833333	0.116505	0.749217	0.891428	0.00584795	0.0238095	0.00970874	0.433241	0.965101		0.017341	0.0120482	0.00970874	1	1
Interleukins and receptors	IL33	0.000932479	0.00152141		0.0467836	0.0238095	0.0194175	0.480331	0.760498	0.140351	0.166667	0.165049	0.800527	0.965101		0	0.0120482	0	0.231198	0.922203
Interleukins and receptors	IL34	3.80788e-07	9.31929e-07		0.00584795	0	0.0194175	0.446466	0.760498	0.222222	0.22619	0.242718	0.924037	0.965101		0.00578035	0.0120482	0	0.491184	0.926612
Interleukins and receptors	IL4R	0.106827	0.129025		0.0292398	0.0357143	0.0582524	0.466811	0.760498	0.111111	0.0833333	0.106796	0.783673	0.965101		0.0115607	0.0120482	0	0.6062	1
Interleukins and receptors	IL5	0.563364	0.575745		0.152047	0.119048	0.135922	0.78329	0.891428	0.0116959	0.0119048	0.0582524	0.0393686	0.895635		0	0	0.00970874	0.518106	0.926612
Interleukins and receptors	IL6	4.86549e-07	1.16023e-06		0.181287	0.142857	0.174757	0.784347	0.891428	0.00584795	0.0238095	0	0.181867	0.965101		0.00578035	0	0	1	1
Interleukins and receptors	IL6R	0.00255755	0.00389922		0.567251	0.666667	0.621359	0.302211	0.760498	0	0	0	NA	NA		0.00578035	0.0120482	0	0.491184	0.926612
Interleukins and receptors	IL7R	1.70516e-21	1.762e-20		0.157895	0.202381	0.242718	0.218114	0.760498	0	0	0	NA	NA		0.0115607	0	0	0.722709	1
Other cytokines	PDGFC	0.275384	0.30489		0.0175439	0.0238095	0.0291262	0.733636	0.891428	0.192982	0.202381	0.23301	0.725938	0.965101		0.0115607	0	0	0.722709	1
Other cytokines	PDGFD	0.302061	0.321791		0.0409357	0.0119048	0.00970874	0.303444	0.760498	0.0994152	0.0714286	0.0776699	0.703505	0.965101		0.00578035	0.0240964	0.00970874	0.355689	0.926612
Other cytokines	PDGFRA	2.61487e-06	5.79006e-06		0.0116959	0.0119048	0.0582524	0.0603073	0.760498	0.0818713	0.130952	0.174757	0.0682297	0.965101		0.0231214	0.0361446	0.00970874	0.517675	0.926612
Other cytokines	PDGFRB	4.26941e-05	7.78539e-05		0.140351	0.142857	0.174757	0.764102	0.891428	0.0175439	0.0119048	0.0194175	0.9182	0.965101		0.0115607	0	0.00970874	1	1
Chemokines and receptors	PF4	0.30449	0.321791		0.0116959	0.0119048	0	0.607473	0.804825	0.169591	0.25	0.252427	0.167712	0.965101		0	0.0120482	0	0.231198	0.922203
Chemokines and receptors	PPBP	0.826696	0.835682		0.0116959	0.0119048	0	0.607473	0.804825	0.169591	0.25	0.252427	0.167712	0.965101		0	0	0.00970874	0.518106	0.926612
Other cytokines	TGFBR1	0.00844193	0.0120785		0.0292398	0.0238095	0	0.245191	0.760498	0.122807	0.142857	0.116505	0.85331	0.965101		0	0.0120482	0	0.231198	0.922203
Other cytokines	TGFBR2	0.0577824	0.0736132		0.0584795	0.0238095	0.038835	0.476339	0.760498	0.0350877	0.0238095	0.0291262	0.88117	0.965101		0.00578035	0	0	1	1
Other cytokines	TGFBR3	0.405601	0.419121		0.0350877	0.0357143	0.0679612	0.448296	0.760498	0.0935673	0.0714286	0.0776699	0.806404	0.965101		0	0	0.00970874	0.518106	0.926612
Other cytokines	TNF	3.07489e-09	8.9364e-09		0.245614	0.27381	0.252427	0.889985	0.929984	0.00584795	0	0.00970874	0.673998	0.965101		0.00578035	0	0	1	1
Other cytokines	TPO	0.19198	0.220421		0.0818713	0.047619	0.0582524	0.603899	0.804825	0.00584795	0	0	0.577923	0.965101		0.0520231	0.0240964	0.0582524	0.557704	0.978613
Other cytokines	VEGFA	1.17342e-05	2.2735e-05		0.28655	0.321429	0.281553	0.817312	0.915783	0.00584795	0	0	0.577923	0.965101		0	0	0.00970874	0.518106	0.926612
Other cytokines	VEGFB	3.31182e-06	6.99999e-06		0.0350877	0	0	0.0481003	0.760498	0.0409357	0.0357143	0.0291262	0.87928	0.965101		0	0.0120482	0	0.231198	0.922203
Other cytokines	VEGFC	1.72014e-06	3.99932e-06		0.0233918	0	0.0291262	0.36943	0.760498	0.239766	0.261905	0.281553	0.740161	0.965101		0.00578035	0.0361446	0.00970874	0.146156	0.922203
Chemokines and receptors	XCL2	1.59208e-16	8.7096e-16		0.538012	0.666667	0.61165	0.127275	0.760498	0.00584795	0	0	0.577923	0.965101		0.0115607	0	0	0.722709	1

## Sheet: S7
Supplementary Table-S7: The significant focal copy number alterations (including amplification and deletion) of each TIME phenotype.
TIME-1-AMP			TIME-1-DEL			TIME-2-AMP			TIME-2-DEL			TIME-3-AMP			TIME-3-DEL
Chr	Gene		Chr	Gene		Chr	Gene		Chr	Gene		Chr	Gene		Chr	Gene
6q13	CD109		13q13.1	EEF1DP3		6p21.1	VEGFA		19q13.41	MIRLET7E/MIR125A/MIR99B/SIGLEC14/SPACA6P-AS		14q24.3	HEATR4/ACOT1		3q28	TP63/MIR944
13q34	ATP4B/COL4A1/COL4A2/F7/F10/GAS6/ING1/LAMP1/GRK1/SOX1/TFDP1/CUL4A/IRS2/PROZ/ARHGEF7/CDC16/TUBGCP3/RASA3/MYO16/ATP11A/MCF2L/TMCO3/DCUN1D2/ANKRD10/RAB20/NAXD/PCID2/UPF3A/CARS2/GRTP1/ADPRHL1/TEX29/SPACA7/LINC00567/LINC00346/CHAMP1/TMEM255B/ATP11AUN/LINC00452/GAS6-AS1/COL4A2-AS2/LINC00552/MCF2L-AS1/LINC00403/LOC100506016/GAS6-AS2/MIR4502/MIR548AR/LINC00565/GRTP1-AS1/LINC00454/COL4A2-AS1/ATP11A-AS1/ARH…		18q12.3	LINC00907					13q14.13	ATP7B/RCBTB2/CPB2/ESD/MLNR/GTF2F2/GUCY1B2/HTR2A/KPNA3/LCP1/NEK3/PCDH8/RB1/TPT1/SUCLA2/DLEU2/TSC22D1/ITM2B/UTP14C/LPAR6/TRIM13/DLEU1/OLFM4/SUGT1/LECT1/FNDC3A/ZC3H13/LRCH1/INTS6/CKAP2/NUFIP1/PCDH17/MED4/DNAJC15/VPS36/PHF11/ENOX1/RCBTB1/NUDT15/GPALPP1/THSD1/CYSLTR2/SPRYD7/SMIM2/RNASEH2B/DHRS12/RUBCNL/CDADC1/CAB39L/CCDC70/COG3/SETDB2/EBPL/EPSTI1/ARL11/WDFY2/LINC00284/PRR20A/FAM216B/LACC1/LINC00330/HN…		1p11.2	PPIAL4A/NBPF8/LINC00623/PFN1P2/RNVU1-4/RNVU1-20/RNVU1-19		16p11.2	TP53TG3/LOC390705/TP53TG3C/TP53TG3D/TP53TG3B/HERC2P4/TP53TG3E/TP53TG3F
4p15.1	LOC101928622		4q35.1	FAM149A/FLJ38576					13q13.3	SMAD9/RFXAP/TRPC4/CCNA1/POSTN/EXOSC8/SPG20/ALG5/UFM1/SOHLH2/SUPT20H/CSNK1A1L/FREM2/SERTM1/LINC00547/CCDC169/SPG20-AS1/CCDC169-SOHLH2/LINC00366/LINC00571/LINC00437/LINC01048		1p36.11	RHD/RSRP1		19q13.2	CYP2A7
22q13.2	RRP7A		14q22.1	ATL1/SAV1								1p36.13	MIR3675		5q33.1	CTB-12O2.1
17q25.3	CD7/CSNK1D/UTS2R/SECTM1/OGFOD3/TEX19/LOC101929511		3p26.3	LOC102723448								9p11.2	CNTNAP3B		16q24.3	APRT/GALNS/PIEZO1/TRAPPC2L/CDT1/RNF166/LOC339059/CTU2/LOC100289580/MIR4722
7q21.3	TAC1		12q24.33	LOC338797/LOC107161159								7q34	MGAM		4q34.3	LOC90768/LINC00290/MIR1305
18q12.3	LINC01477		3p12.1	LINC00971								8q24.3	ZNF623		2q21.1	RAB6C/FAR2P1/POTEF
4q13.1	TECRL		4q22.3	ADH1A/ADH1B/ADH1C/ADH4/ADH5/ADH6/ADH7/AFM/AFP/ALB/ANK2/ANXA3/AREG/ART3/ATOH1/BMP3/BMPR1B/BTC/CAMK2D/CASP6/CCNG2/SCARB2/CDS1/CENPE/DMP1/DSPP/EGF/EIF4E/ENPEP/EREG/FGF5/GK2/GRID2/CXCL1/CXCL2/CXCL3/H2AFZ/HADH/HNRNPD/IBSP/CFI/CXCL8/CXCL10/MANBA/CXCL9/AFF1/MTTP/NFKB1/NKX6-1/PDHA2/PF4/PF4V1/PITX2/PKD2/PPEF2/PPBP/PPP3CA/PRKG2/MAPK10/PTPN13/RAP1GDS1/RPL34/CXCL6/CXCL11/CXCL5/SNCA/SPP1/TACR3/UBE2D3/SPARCL1/…								13q21.1	PRR20A		19p13.3	AES/AMH/ATP5D/AZU1/HCN2/BSG/CDC34/CIRBP/CNN2/CSNK1G2/CFD/ARID3A/EFNA2/ELANE/GAMT/GNA11/GNA15/GNG7/MKNK2/GPX4/GZMM/GADD45B/OAZ1/PALM/POLR2E/POLRMT/PRTN3/PTBP1/RPS15/SGTA/STK11/TCF3/THOP1/TLE2/MADCAM1/SF3A2/PLPP2/S1PR4/AP3D1/MED16/FSTL3/APC2/ABCA7/UQCR11/SBNO2/ARHGAP45/SHC2/TIMM13/DAZAP1/RNU6-1/FGF22/SLC39A3/THEG/LSM7/MBD3/MIER2/PCSK4/C19orf24/PLEKHJ1/BTBD2/RNF126/NCLN/SPPL2B/WDR18/REXO1/ZNF77/CELF…
8q24.21	ANXA13/MYC/NDUFB9/POU5F1B/PVT1/SQLE/MTSS1/KIAA0196/TRIB1/RNF139/ZHX1/ZHX2/ATAD2/TRMT12/WDYHV1/DERL1/TATDN1/C8orf76/FAM83A/TBC1D31/FBXO32/CCDC26/ZNF572/FER1L6-AS2/TMEM65/LINC00964/FAM84B/FAM91A1/NSMCE2/KLHL38/FER1L6-AS1/TMEM75/FER1L6/MIR548D1/CASC8/LINC00977/LINC00861/FAM83A-AS1/CASC11/MIR1205/MIR1206/MIR1207/MIR1204/MIR1208/MIR3686/MIR548AA1/CCAT1/ZHX1-C8orf76/MIR4662A/MIR4662B/MIR4663/PCAT1/CCAT…		6q26	ACAT2/CCR6/ESR1/FUCA2/GPR31/GRM1/IGF2R/KIF25/LPA/MAS1/MAP3K4/AFDN/OPRM1/PARK2/PCMT1/PDCD2/PLAGL1/PLG/PSMB1/RPS6KA2/SLC22A1/SLC22A3/SLC22A2/SOD2/T/TBP/TCP1/TCP10/TCTE3/DYNLT1/THBS2/UTRN/EZR/VIP/EPM2A/PEX3/RNASET2/STX11/SYNJ2/LATS1/QKI/WTAP/AKAP12/PHACTR2/UST/PDE10A/RAB32/KATNA1/FGFR1OP/SCAF8/TAB2/SASH1/SYNE1/MTHFD1L/IPCEF1/TIAM2/LINC01558/FBXO5/RGS17/DLL1/MRPL18/CLDN20/NOX3/TFB1M/SNX9/MPC1/UNC93A/…								8q24.12	EXT1/NOV/TNFRSF11B/ENPP2/SNTB1/TAF2/COL14A1/COLEC10/MTBP/MRPL13/DEPTOR/DSCC1/MED30/MAL2/SLC30A8/SAMD12/SAMD12-AS1/LOC101927513/LOC101927543/MIR548AZ		12p13.31	SLC2A3/SLC2A14
1q44	ZNF692/ZNF672/SH3BP5L/PGBD2/OR14I1/OR2T27/LYPD8/MIR3124/LOC101928226 OR2T3											15q11.1	HERC2P3 CHEK2P2		13q14.3	CKAP2/VPS36/THSD1/TPTE2P3/LOC103191607
												9p12	GLIDR/ANKRD20A3/ANKRD20A2/LOC554249/FGF7P3/LOC102724238		4p15.31	KCNIP4/MIR7978
															9p12	GLIDR/ANKRD20A3/ANKRD20A2/AQP7P3/LOC554249/FGF7P3/GXYLT1P3/FAM95B1/LOC101929583/LOC102724238/LOC102724580
															8p21.1	ADRA1A/ADRB3/ANK1/ASPH/ATP6V1B2/BMP1/POLR3D/BNIP3L/OSGIN2/CA1/CA2/CA3/CA8/CALB1/RUNX1T1/CEBPD/CHRNA2/CHRNB3/CLU/CRH/CYP7A1/ADAM3A/DECR1/DPYSL2/DUSP4/E2F5/EGR3/EIF4EBP1/DMTN/EPHX2/EXTL3/EYA1/FABP4/FABP5/PTK2B/FGFR1/FNTA/ADAM2/GFRA2/GNRH1/NPBWR1/GSR/GTF2E2/NRG1/HNF4G/IKBKB/IL7/IMPA1/IDO1/LOXL2/LPL/LYN/MCM4/MMP16/MOS/MYBL1/NBN/NEFM/NEFL/NKX3-1/OPRK1/PDE7A/PENK/PLAG1/PLAT/PNOC/PMP2/POLB/PPP2CB/PPP2R2…
															10q23.31	PTEN/ATAD1/CFL1P1/KLLN
															11q25	ACAD8/GLB1L2/GLB1L3
															22q11.23	DDT/GSTT2/MIF/SMARCB1/SLC2A11/DERL3/MIF-AS1/LOC391322/GSTT2B/DDTL
															2p11.2	LINC00152/MIR4435-2/MIR4771-1/MIR4435-1
															7p14.1	TARP
															12q23.1	ANKS1B/FAM71C/LOC101928937
															2q22.1	ACVR1/ACVR2A/RND3/ATP5G3/CACNB4/CHN1/CHRNA1/ATF2/DLX1/DLX2/DYNC1I2/DPP4/FAP/GAD1/GALNT3/GCG/GPD2/GRB14/HNMT/HOXD13/ITGA6/ITGB6/KCNJ3/KIF5C/LRP2/LY75/NEB/NR4A2/ORC4/PDK1/RBMS1/SCN1A/SCN2A/SCN3A/SCN7A/SCN9A/SP3/SSB/TNFAIP6/WIPF1/PKP4/HAT1/SLC25A12/ABCB11/B3GALT1/KYNU/NMI/PPIG/CIR1/CYTIP/ZEB2/TLK1/CD302/TANK/DHRS9/PSMD14/STAM2/KLHL41/TBR1/RAPGEF4/GALNT5/NXPH2/COBLL1/PLA2R1/GCA/GORASP2/EPC2/ARL5A/RNU…
															21p11.2	BAGE/CBS/CRYAA/PWP2/TPTE/U2AF1/C21orf33/ICOSLG/SMIM11A/BAGE4/BAGE3/BAGE2/LINC00313/SIK1/LINC00319/MGC39584/MIR663A/RNA5-8S5/RNA18S5/RNA28S5/TEKT4P2/MIR3687-1/MIR3648-1/LOC100507412/RNA45S5/C21orf140/MIR6724-1/MIR8069-1/LOC102723360/KCNE1B/SMIM11B/LOC102724219/LOC102724354/LOC102724428/U2AF1L5/LOC102724652/LOC102724843/MIR6724-2/MIR6724-3/LOC105372833/LOC105379511/LOC105379514/FRGCA
															22q11.1	POTEH/OR11H1/POTEH-AS1
															1p21.1	AMY1A/AMY1B/AMY1C/AMY2A
															4q21.22	ADH1A/ADH1B/ADH1C/ADH4/ADH5/ADH6/ADH7/AFM/AFP/ANK2/ANXA3/AREG/ART3/ATOH1/BMP3/BMPR1B/BTC/CAMK2D/CASP6/CCNG2/SCARB2/CDS1/CENPE/DMP1/DSPP/EGF/EIF4E/ENPEP/EREG/FGF5/GK2/GRID2/CXCL1/CXCL2/CXCL3/H2AFZ/HADH/HNRNPD/IBSP/CFI/CXCL8/CXCL10/MANBA/CXCL9/AFF1/MTTP/NFKB1/NKX6-1/PDHA2/PF4/PF4V1/PITX2/PKD2/PPEF2/PPBP/PPP3CA/PRKG2/MAPK10/PTPN13/RAP1GDS1/RPL34/CXCL6/CXCL11/CXCL5/SNCA/SPP1/TACR3/UBE2D3/UGT8/SPARCL1…
															8p23.2	CSMD1/LOC101927815 NAT1/NAT2/ADCY8/ADRA1A/ADRB3/ANGPT1/ANGPT2/ANK1/ANXA13/ASAH1/ASPH/ATP6V1B2/ATP6V1C1/ADGRB1/BLK/BMP1/POLR3D/BNIP3L/OSGIN2/CA1/CA2/CA3/CA8/CALB1/RUNX1T1/CDH17/CEBPD/CHRNA2/CHRNB3/CLU/COX6C/CRH/CTSB/CYC1/CYP7A1/CYP11B1/CYP11B2/ADAM3A/DECR1/DEFA1/DEFA3/DEFA4/DEFA5/DEFA6/DEFB1/DEFB4A/DPYS/DPYSL2/DUSP4/E2F5/EEF1D/EGR3/EIF4EBP1/DMTN/EPHX2/CLN8/EXT1/EXTL3/EYA1/FABP4/FABP5/PTK2B/FDFT1/F…
															16q22.1	PDPR/LOC400541
															9q31.3	ABCA1/ALAD/ALDH1A1/ALDOB/AMBP/ANXA1/APBA1/AUH/BAAT/KLF9/TNFSF8/CKS2/COL15A1/SLC31A1/SLC31A2/CTSL/CTSV/CTSLP8/CYLC2/DAPK1/ECM2/LPAR1/S1PR3/FANCC/FBP1/FKTN/FOXE1/FXN/GAS1/GCNT1/GNAQ/GNG10/HNRNPK/HSD17B3/TNC/IARS/MUSK/NCBP1/NFIL3/NINJ1/NTRK2/ROR2/OMD/OGN/ORM1/ORM2/PAPPA/PCSK5/PGM5/PHF2/PPP3R2/PRKACG/PTCH1/PTPN3/RAD23B/RGS3/RORB/SYK/TAL2/TGFBR1/TLE1/TLE4/TMOD1/TXN/UGCG/CORO2A/XPA/ZFP37/ZNF189/ZFAND5/…
															5q13.2	hsa-mir-886/hsa-mir-1244-2/hsa-mir-1274a/ADCY2/ADRA1B/ADRB2/ANXA6/APC/TRIM23/ARSB/ATOX1/ALDH7A1/BHMT/BNIP1/BTF3/C6/C7/C9/CAMK4/CAMK2A/CAMLG/CANX/CAST/CCNB1/CCNG1/CCNH/CD14/CD74/CDC25C/CDH6/CDH9/CDH10/CDH12/CDH18/CDK7/CDO1/CDX1/CETN3/CHD1/CKMT2/ERCC8/AP3S1/CLTB/COX7C/CRHBP/HAPLN1/CSF1R/CSF2/CSNK1A1/CSNK1G3/VCAN/NKX2-5/CTNNA1/CTNND2/DAB2/DAP/DBN1/DMXL1/DHFR/DIAPH1/DNAH5/DOCK2/DPYSL3/DRD1/SLC26A2/HB…
															22q13.2	ACR/ACO2/ADORA2A/GRK3/ADSL/AP1B1/ARSA/ARVCF/ATF4/ATP6V1E1/BCR/BID/BIK/TSPO/MPPED1/CHKB/COMT/CPT1B/CRKL/CRYBA4/CRYBB1/CRYBB2/CRYBB2P1/CRYBB3/CSF2RB/CSNK1E/CYP2D7/CYP2D6/DDT/CYB5R3/TYMP/EP300/EWSR1/FBLN1/XRCC6/GGT1/GGT3P/GGT5/GNAZ/GP1BB/MCHR1/GSC2/GSTT2/H1F0/SERPIND1/HMOX1/IGLL1/IL2RB/KCNJ4/LGALS1/LGALS2/LIF/LIMK2/MB/MCM5/MFNG/MGAT3/MIF/MMP11/MN1/MPST/MYH9/NAGA/NCF4/NDUFA6/DRG1/NEFH/NF2/SNU13/OSM/P…

## Sheet: S8
Supplementary Table-S8: The epigenetically silenced genes (ESGs) in three TIME phenotypes.
TIME-1				TIME-2				TIME-3
Gene.ID	Frequnency	Percenge		Gene.ID	Frequnency	Percenge		Gene.ID	Frequnency	Percenge
ACN9	20	0.110497		ALPP	18	0.214286		ANXA5	12	0.113208
ACOX2	20	0.110497		C3	12	0.142857		BTBD6	16	0.150943
ANXA5	29	0.160221		CPS1	14	0.166667		C16orf62	41	0.386792
APOA1	29	0.160221		CRYBA2	10	0.119048		C2orf72	12	0.113208
CDO1	28	0.154696		CUBN	9	0.107143		C3	24	0.226415
CFC1B	42	0.232044		DNM1	26	0.309524		CACNG7	81	0.764151
CGB7	22	0.121547		FAM198A	45	0.535714		CDO1	11	0.103774
CPS1	59	0.325967		FER1L4	22	0.261905		CNTNAP4	12	0.113208
FOXD4	154	0.850829		FURIN	17	0.202381		CPS1	38	0.358491
FURIN	38	0.209945		HFE2	14	0.166667		DKFZP434H168	27	0.254717
GATM	22	0.121547		HOXA3	24	0.285714		DLGAP2	13	0.122642
GPR126	21	0.116022		LAMA3	9	0.107143		DPYS	20	0.188679
IL1RN	20	0.110497		MIR449C	13	0.154762		ETNK2	16	0.150943
JAKMIP3	30	0.165746		MYO7A	12	0.142857		F2	12	0.113208
KRT77	29	0.160221		NPM3	9	0.107143		FGFR4	20	0.188679
L1TD1	132	0.729282		PAPLN	26	0.309524		FURIN	20	0.188679
MIER2	36	0.198895		PHYHD1	13	0.154762		GATM	21	0.198113
MYO7A	29	0.160221		PLCL2	9	0.107143		GLIS1	15	0.141509
PARP6	110	0.607735		RNF2	9	0.107143		GTF2A1L	13	0.122642
PHYHD1	55	0.303867		RTN4RL2	10	0.119048		HOXA3	46	0.433962
PROKR1	21	0.116022		S100A16	9	0.107143		KCNT1	24	0.226415
PTGR1	21	0.116022		SEMA3B	40	0.47619		KIF26B	29	0.273585
SARDH	19	0.104972		SYCP1	26	0.309524		LAD1	17	0.160377
SLC6A1	19	0.104972		TRPM3	19	0.22619		LAX1	18	0.169811
SNX7	26	0.143646		WIPF3	47	0.559524		MYF6	93	0.877358
TMEM176B	21	0.116022						OR4K2	24	0.226415
TRPM3	54	0.298343						PAPSS2	16	0.150943
TSKU	25	0.138122						PHYHD1	32	0.301887
UBE2L6	26	0.143646						PNLIPRP2	27	0.254717
UCN	81	0.447514						PRRT4	66	0.622642
ZNF266	22	0.121547						RBP4	17	0.160377
								SDCBP2	13	0.122642
								SORT1	17	0.160377
								SQLE	14	0.132075
								TLE6	20	0.188679
								TMEM132B	14	0.132075
								TTC38	12	0.113208
								TUSC5	21	0.198113
								UCN	48	0.45283

## Sheet: S9
Supplementary Table-S9: Ninety-eight phenotype-related differentially expressed genes (DEGs).
Gene.ID	Gene.name
JCHAIN	joining chain of multimeric IgA and IgM
IGLL5	immunoglobulin lambda like polypeptide 5
CCL19	C-C motif chemokine ligand 19
SAA1	serum amyloid A1
FOXP3	forkhead box P3
MFSD2A	major facilitator superfamily domain containing 2A
FNDC5	fibronectin type III domain containing 5
CYP2A7	cytochrome P450 family 2 subfamily A member 7
GCK	glucokinase
DAO	D-amino acid oxidase
RTP3	receptor transporter protein 3
SEC14L2	SEC14 like lipid binding 2
CYP8B1	cytochrome P450 family 8 subfamily B member 1
PFKFB1	6-phosphofructo-2-kinase/fructose-2,6-biphosphatase 1
CYP2A6	cytochrome P450 family 2 subfamily A member 6
MOGAT2	monoacylglycerol O-acyltransferase 2
SLC28A1	solute carrier family 28 member 1
HAO2	hydroxyacid oxidase 2
IGSF23	immunoglobulin superfamily member 23
TTC36	tetratricopeptide repeat domain 36
ABCB4	ATP binding cassette subfamily B member 4
THRSP	thyroid hormone responsive
GLYATL1	glycine-N-acyltransferase like 1
CYP4A22	cytochrome P450 family 4 subfamily A member 22
SLC10A1	solute carrier family 10 member 1
SLC27A5	solute carrier family 27 member 5
TESC	tescalcin
SLC51A	solute carrier family 51 alpha subunit
GYS2	glycogen synthase 2
BBOX1	gamma-butyrobetaine hydroxylase 1
SLC22A7	solute carrier family 22 member 7
F9	coagulation factor IX
CYP2B6	cytochrome P450 family 2 subfamily B member 6
FETUB	fetuin B
ACSM2A	acyl-CoA synthetase medium chain family member 2A
CYP2C8	cytochrome P450 family 2 subfamily C member 8
TTR	transthyretin
RDH16	retinol dehydrogenase 16
HSD17B13	hydroxysteroid 17-beta dehydrogenase 13
SLC25A47	solute carrier family 25 member 47
SERPINA11	serpin family A member 11
SLC22A1	solute carrier family 22 member 1
GLYAT	glycine-N-acyltransferase
HPR	haptoglobin-related protein
CYP7A1	cytochrome P450 family 7 subfamily A member 1
APOF	apolipoprotein F
SERPINC1	serpin family C member 1
GSTA2	glutathione S-transferase alpha 2
SULT2A1	sulfotransferase family 2A member 1
GSTA1	glutathione S-transferase alpha 1
HPD	4-hydroxyphenylpyruvate dioxygenase
SPP1	secreted phosphoprotein 1
TAT	tyrosine aminotransferase
CYP3A4	cytochrome P450 family 3 subfamily A member 4
EPCAM	epithelial cell adhesion molecule
CD3E	CD3e molecule
LCK	LCK proto-oncogene, Src family tyrosine kinase
CD48	CD48 molecule
CD2	CD2 molecule
CST7	cystatin F
GZMA	granzyme A
GZMK	granzyme K
CD52	CD52 molecule
CD27	CD27 molecule
CD8A	CD8a molecule
CCL5	C-C motif chemokine ligand 5
CORO1A	coronin 1A
CD3D	CD3d molecule
SLAMF7	SLAM family member 7
NKG7	natural killer cell granule protein 7
CALHM6	calcium homeostasis modulator family member 6
PLA2G2D	phospholipase A2 group IID
GBP5	guanylate binding protein 5
C1QA	complement C1q A chain
HLA-DPB1	major histocompatibility complex, class II, DP beta 1
IL7R	interleukin 7 receptor
CD53	CD53 molecule
HLA-DQB1	major histocompatibility complex, class II, DQ beta 1
C1QB	complement C1q B chain
CD79A	CD79a molecule
HLA-DQA1	major histocompatibility complex, class II, DQ alpha 1
RAC2	Rac family small GTPase 2
HLA-DRB1	major histocompatibility complex, class II, DR beta 1
HLA-DPA1	major histocompatibility complex, class II, DP alpha 1
C1QC	complement C1q C chain
MZB1	marginal zone B and B1 cell specific protein
HLA-DRA	major histocompatibility complex, class II, DR alpha
IL2RG	interleukin 2 receptor subunit gamma
LGALS2	galectin 2
BASP1	brain abundant membrane attached signal protein 1
LTB	lymphotoxin beta
CXCL9	C-X-C motif chemokine ligand 9
PTGDS	prostaglandin D2 synthase
CCL21	C-C motif chemokine ligand 21
MMP9	matrix metallopeptidase 9
EFEMP1	EGF containing fibulin extracellular matrix protein 1
LUM	lumican
PLA2G2A	phospholipase A2 group IIA

## Sheet: S10
Supplementary Table-S10: GO annotation of 98 phenotype-related DEGs.
ID	Description	GeneRatio	BgRatio	pvalue	p.adjust	qvalue	ENTREZID	Count
GO:0042110	T cell activation	16/91	443/17913	7.12e-10	1.26e-06	9.78e-07	6363/50943/916/3932/914/939/925/6352/11151/915/26279/3115/3575/5880/3113/6366	16
GO:0002694	regulation of leukocyte activation	16/91	492/17913	3.22e-09	1.77e-06	1.37e-06	6363/50943/916/3932/914/8530/939/6352/11151/712/3115/3575/5880/3113/51237/6366	16
GO:0002696	positive regulation of leukocyte activation	13/91	305/17913	4.57e-09	1.77e-06	1.37e-06	6363/50943/916/3932/914/939/6352/11151/712/3115/3575/3113/6366	13
GO:0050863	regulation of T cell activation	13/91	307/17913	4.95e-09	1.77e-06	1.37e-06	6363/50943/916/3932/914/939/6352/11151/3115/3575/5880/3113/6366	13
GO:0050870	positive regulation of T cell activation	11/91	198/17913	4.99e-09	1.77e-06	1.37e-06	6363/50943/916/3932/939/6352/11151/3115/3575/3113/6366	11
GO:0050867	positive regulation of cell activation	13/91	319/17913	7.83e-09	2.31e-06	1.79e-06	6363/50943/916/3932/914/939/6352/11151/712/3115/3575/3113/6366	13
GO:1903039	positive regulation of leukocyte cell-cell adhesion	11/91	214/17913	1.12e-08	2.84e-06	2.2e-06	6363/50943/916/3932/939/6352/11151/3115/3575/3113/6366	11
GO:0051249	regulation of lymphocyte activation	14/91	401/17913	1.41e-08	3.13e-06	2.43e-06	6363/50943/916/3932/914/939/6352/11151/3115/3575/5880/3113/51237/6366	14
GO:0050851	antigen receptor-mediated signaling pathway	11/91	224/17913	1.8e-08	3.55e-06	2.75e-06	50943/916/3932/915/3115/3119/973/3117/3123/3113/3122	11
GO:0050852	T cell receptor signaling pathway	10/91	180/17913	2.6e-08	4.61e-06	3.57e-06	50943/916/3932/915/3115/3119/3117/3123/3113/3122	10
GO:0046651	lymphocyte proliferation	11/91	244/17913	4.34e-08	6.96e-06	5.4e-06	6363/50943/916/6352/11151/3115/3575/973/5880/3113/51237	11
GO:0032943	mononuclear cell proliferation	11/91	246/17913	4.71e-08	6.96e-06	5.4e-06	6363/50943/916/6352/11151/3115/3575/973/5880/3113/51237	11
GO:0022409	positive regulation of cell-cell adhesion	11/91	251/17913	5.79e-08	7.89e-06	6.12e-06	6363/50943/916/3932/939/6352/11151/3115/3575/3113/6366	11
GO:0051251	positive regulation of lymphocyte activation	11/91	258/17913	7.66e-08	8.98e-06	6.96e-06	6363/50943/916/3932/939/6352/11151/3115/3575/3113/6366	11
GO:0008202	steroid metabolic process	12/91	321/17913	7.95e-08	8.98e-06	6.96e-06	23541/1582/1548/10998/1555/1558/8608/1581/319/6822/6696/1576	12
GO:0042737	drug catabolic process	8/91	109/17913	8.11e-08	8.98e-06	6.96e-06	1610/1548/1555/1558/6822/3242/6898/1576	8
GO:0007159	leukocyte cell-cell adhesion	12/91	328/17913	1e-07	1.05e-05	8.12e-06	6363/50943/916/3932/939/6352/11151/3115/3575/5880/3113/6366	12
GO:0070661	leukocyte proliferation	11/91	270/17913	1.21e-07	1.2e-05	9.26e-06	6363/50943/916/6352/11151/3115/3575/973/5880/3113/51237	11
GO:1903037	regulation of leukocyte cell-cell adhesion	11/91	295/17913	2.95e-07	2.65e-05	2.05e-05	6363/50943/916/3932/939/6352/11151/3115/3575/3113/6366	11
GO:0042738	exogenous drug catabolic process	4/91	12/17913	2.99e-07	2.65e-05	2.05e-05	1548/1555/1558/1576	4
GO:0042102	positive regulation of T cell proliferation	7/91	90/17913	3.67e-07	3.09e-05	2.4e-05	6363/50943/916/6352/11151/3115/3113	7
GO:0015718	monocarboxylic acid transport	8/91	137/17913	4.75e-07	3.83e-05	2.97e-05	84879/5244/7069/6554/10998/200931/26279/5320	8
GO:0045785	positive regulation of cell adhesion	12/91	388/17913	6.08e-07	4.62e-05	3.58e-05	6363/6288/50943/916/3932/939/6352/11151/3115/3575/3113/6366	12
GO:0022407	regulation of cell-cell adhesion	12/91	389/17913	6.25e-07	4.62e-05	3.58e-05	6363/50943/4072/916/3932/939/6352/11151/3115/3575/3113/6366	12
GO:0050670	regulation of lymphocyte proliferation	9/91	199/17913	7.68e-07	5.45e-05	4.22e-05	6363/50943/916/6352/11151/3115/5880/3113/51237	9
GO:0032944	regulation of mononuclear cell proliferation	9/91	200/17913	8.01e-07	5.46e-05	4.23e-05	6363/50943/916/6352/11151/3115/5880/3113/51237	9
GO:0042129	regulation of T cell proliferation	8/91	149/17913	9e-07	5.91e-05	4.58e-05	6363/50943/916/6352/11151/3115/5880/3113	8
GO:0002521	leukocyte differentiation	13/91	485/17913	1e-06	6.34e-05	4.91e-05	6363/50943/54997/916/3932/914/939/915/26279/3575/973/714/4318	13
GO:0071346	cellular response to interferon-gamma	8/91	153/17913	1.1e-06	6.73e-05	5.21e-05	6352/115362/3115/3119/3117/3123/3113/3122	8
GO:0070663	regulation of leukocyte proliferation	9/91	214/17913	1.41e-06	8.31e-05	6.44e-05	6363/50943/916/6352/11151/3115/5880/3113/51237	9
GO:0019882	antigen processing and presentation	9/91	220/17913	1.77e-06	0.000101142	7.84e-05	6363/925/3115/3119/3117/3123/3113/3122/6366	9
GO:0034341	response to interferon-gamma	8/91	173/17913	2.77e-06	0.000153285	0.000118762	6352/115362/3115/3119/3117/3123/3113/3122	8
GO:0030217	T cell differentiation	9/91	234/17913	2.94e-06	0.000157811	0.000122269	6363/50943/916/3932/914/939/915/26279/3575	9
GO:0042098	T cell proliferation	8/91	177/17913	3.28e-06	0.000171023	0.000132505	6363/50943/916/6352/11151/3115/5880/3113	8
GO:0050671	positive regulation of lymphocyte proliferation	7/91	125/17913	3.39e-06	0.000171233	0.000132668	6363/50943/916/6352/11151/3115/3113	7
GO:2000107	negative regulation of leukocyte apoptotic process	5/91	46/17913	3.52e-06	0.000171233	0.000132668	6363/939/6352/3575/6366	5
GO:0032946	positive regulation of mononuclear cell proliferation	7/91	126/17913	3.57e-06	0.000171233	0.000132668	6363/50943/916/6352/11151/3115/3113	7
GO:0050900	leukocyte migration	12/91	467/17913	4.18e-06	0.00019507	0.000151136	3512/6363/6288/4072/3932/962/914/6352/11151/5880/6366/4318	12
GO:0070665	positive regulation of leukocyte proliferation	7/91	134/17913	5.38e-06	0.000244387	0.000189346	6363/50943/916/6352/11151/3115/3113	7
GO:0002429	immune response-activating cell surface receptor signaling pathway	11/91	399/17913	5.59e-06	0.000247823	0.000192008	50943/916/3932/915/3115/3119/973/3117/3123/3113/3122	11
GO:0030098	lymphocyte differentiation	10/91	325/17913	5.89e-06	0.000254892	0.000197485	6363/50943/916/3932/914/939/915/26279/3575/973	10
GO:0060333	interferon-gamma-mediated signaling pathway	6/91	91/17913	6.86e-06	0.00028945	0.00022426	3115/3119/3117/3123/3113/3122	6
GO:0006869	lipid transport	10/91	332/17913	7.11e-06	0.000293044	0.000227044	84879/5244/7069/6554/10998/200931/319/6696/26279/5320	10
GO:0019886	antigen processing and presentation of exogenous peptide antigen via MHC class II	6/91	97/17913	9.92e-06	0.000399737	0.000309708	3115/3119/3117/3123/3113/3122	6
GO:0002495	antigen processing and presentation of peptide antigen via MHC class II	6/91	100/17913	1.18e-05	0.000465785	0.00036088	3115/3119/3117/3123/3113/3122	6
GO:0002768	immune response-regulating cell surface receptor signaling pathway	11/91	434/17913	1.23e-05	0.000472208	0.000365857	50943/916/3932/915/3115/3119/973/3117/3123/3113/3122	11
GO:0002504	antigen processing and presentation of peptide or polysaccharide antigen via MHC class II	6/91	101/17913	1.25e-05	0.000472208	0.000365857	3115/3119/3117/3123/3113/3122	6
GO:0098883	synapse pruning	3/91	10/17913	1.48e-05	0.000547865	0.000424475	712/713/714	3
GO:0010876	lipid localization	10/91	366/17913	1.66e-05	0.000599922	0.000464807	84879/5244/7069/6554/10998/200931/319/6696/26279/5320	10
GO:0002449	lymphocyte mediated immunity	9/91	293/17913	1.8e-05	0.000637299	0.000493766	50943/939/11151/57823/712/3575/3119/713/714	9
GO:1901615	organic hydroxy compound metabolic process	11/91	500/17913	4.53e-05	0.00157547	0.00122064	1610/23541/1582/80168/10998/7276/8608/1581/319/6822/1576	11
GO:2000106	regulation of leukocyte apoptotic process	5/91	82/17913	6.07e-05	0.00207001	0.0016038	6363/939/6352/3575/6366	5
GO:0071621	granulocyte chemotaxis	5/91	84/17913	6.81e-05	0.00227967	0.00176624	6363/6288/6352/5880/6366	5
GO:0071622	regulation of granulocyte chemotaxis	4/91	44/17913	7.24e-05	0.00237793	0.00184237	6363/6352/5880/6366	4
GO:0033628	regulation of cell adhesion mediated by integrin	4/91	45/17913	7.92e-05	0.00255256	0.00197767	54997/916/6352/6366	4
GO:0070233	negative regulation of T cell apoptotic process	3/91	17/17913	8.19e-05	0.00259331	0.00200924	939/6352/3575	3
GO:0001819	positive regulation of cytokine production	10/91	446/17913	8.79e-05	0.00273432	0.0021185	6363/6288/50943/916/914/115362/3115/3113/4050/4060	10
GO:0008206	bile acid metabolic process	4/91	47/17913	9.41e-05	0.0028753	0.00222772	1582/10998/1581/6822	4
GO:0032649	regulation of interferon-gamma production	5/91	93/17913	0.000110677	0.00332594	0.00257687	50943/916/914/3115/3113	5
GO:0001676	long-chain fatty acid metabolic process	5/91	94/17913	0.00011643	0.00344051	0.00266564	10998/1558/2938/1576/5730	5
GO:0015849	organic acid transport	8/91	293/17913	0.000122215	0.00349496	0.00270782	84879/5244/7069/6554/10998/200931/26279/5320	8
GO:0046942	carboxylic acid transport	8/91	293/17913	0.000122215	0.00349496	0.00270782	84879/5244/7069/6554/10998/200931/26279/5320	8
GO:0002460	adaptive immune response based on somatic recombination of immune receptors built from immunoglobulin superfamily domains	8/91	295/17913	0.000128076	0.00360443	0.00279264	6363/50943/939/712/3575/3119/713/714	8
GO:0033630	positive regulation of cell adhesion mediated by integrin	3/91	20/17913	0.000135811	0.00376238	0.00291501	916/6352/6366	3
GO:0097530	granulocyte migration	5/91	100/17913	0.000155922	0.0041775	0.00323664	6363/6288/6352/5880/6366	5
GO:0050727	regulation of inflammatory response	10/91	479/17913	0.000157666	0.0041775	0.00323664	6288/50943/8530/6352/115362/712/713/714/4318/5320	10
GO:0015721	bile acid and bile salt transport	3/91	21/17913	0.000157864	0.0041775	0.00323664	6554/10998/200931	3
GO:0031295	T cell costimulation	4/91	55/17913	0.000174367	0.00454636	0.00352243	6363/916/3932/6366	4
GO:0071887	leukocyte apoptotic process	5/91	103/17913	0.000179147	0.00460329	0.00356654	6363/939/6352/3575/6366	5
GO:0031294	lymphocyte costimulation	4/91	56/17913	0.000187055	0.00473782	0.00367077	6363/916/3932/6366	4
GO:0032609	interferon-gamma production	5/91	105/17913	0.000196037	0.00489541	0.00379286	50943/916/914/3115/3113	5
GO:0072330	monocarboxylic acid biosynthetic process	8/91	318/17913	0.000213896	0.00526718	0.00408091	2645/1582/5207/10998/1558/1581/1576/5730	8
GO:0016064	immunoglobulin mediated immune response	6/91	171/17913	0.000236317	0.00561691	0.00435187	50943/939/712/3119/713/714	6
GO:0002407	dendritic cell chemotaxis	3/91	24/17913	0.000237602	0.00561691	0.00435187	6363/6352/6366	3
GO:0090023	positive regulation of neutrophil chemotaxis	3/91	24/17913	0.000237602	0.00561691	0.00435187	6363/5880/6366	3
GO:0030593	neutrophil chemotaxis	4/91	60/17913	0.000244531	0.00570464	0.00441984	6363/6288/5880/6366	4
GO:0019724	B cell mediated immunity	6/91	173/17913	0.000251611	0.00579359	0.00448875	50943/939/712/3119/713/714	6
GO:0002478	antigen processing and presentation of exogenous peptide antigen	6/91	174/17913	0.000259544	0.00579784	0.00449205	3115/3119/3117/3123/3113/3122	6
GO:0033627	cell adhesion mediated by integrin	4/91	61/17913	0.000260681	0.00579784	0.00449205	54997/916/6352/6366	4
GO:0051209	release of sequestered calcium ion into cytosol	5/91	112/17913	0.000264876	0.00579784	0.00449205	6363/3932/11151/4283/6366	5
GO:0051283	negative regulation of sequestering of calcium ion	5/91	112/17913	0.000264876	0.00579784	0.00449205	6363/3932/11151/4283/6366	5
GO:0006706	steroid catabolic process	3/91	25/17913	0.000269012	0.00581655	0.00450655	1581/6696/1576	3
GO:0019884	antigen processing and presentation of exogenous antigen	6/91	176/17913	0.000276002	0.00585899	0.00453942	3115/3119/3117/3123/3113/3122	6
GO:0032729	positive regulation of interferon-gamma production	4/91	62/17913	0.000277583	0.00585899	0.00453942	916/914/3115/3113	4
GO:0051282	regulation of sequestering of calcium ion	5/91	114/17913	0.000287554	0.00599804	0.00464716	6363/3932/11151/4283/6366	5
GO:0071624	positive regulation of granulocyte chemotaxis	3/91	26/17913	0.000302984	0.00624641	0.00483959	6363/5880/6366	3
GO:0007204	positive regulation of cytosolic calcium ion concentration	7/91	255/17913	0.000319401	0.00650917	0.00504317	6363/6288/3932/1043/11151/4283/6366	7
GO:0051208	sequestering of calcium ion	5/91	117/17913	0.000324299	0.00653389	0.00506232	6363/3932/11151/4283/6366	5
GO:0006066	alcohol metabolic process	8/91	339/17913	0.000329035	0.00654482	0.0050708	23541/80168/7276/8608/1581/319/6822/1576	8
GO:0015711	organic anion transport	9/91	430/17913	0.000335216	0.00654482	0.0050708	84879/5244/7069/6554/10998/200931/10864/26279/5320	9
GO:0036336	dendritic cell migration	3/91	27/17913	0.000339607	0.00654482	0.0050708	6363/6352/6366	3
GO:1902624	positive regulation of neutrophil migration	3/91	27/17913	0.000339607	0.00654482	0.0050708	6363/5880/6366	3
GO:0070229	negative regulation of lymphocyte apoptotic process	3/91	28/17913	0.000378965	0.00722479	0.00559762	939/6352/3575	3
GO:0030595	leukocyte chemotaxis	6/91	188/17913	0.000392745	0.00732986	0.00567903	6363/6288/6352/11151/5880/6366	6
GO:0048002	antigen processing and presentation of peptide antigen	6/91	188/17913	0.000392745	0.00732986	0.00567903	3115/3119/3117/3123/3113/3122	6
GO:0033077	T cell differentiation in thymus	4/91	69/17913	0.000418692	0.00769838	0.00596454	50943/916/915/3575	4
GO:1902105	regulation of leukocyte differentiation	7/91	267/17913	0.000421175	0.00769838	0.00596454	6363/50943/54997/914/939/3575/714	7
GO:0097553	calcium ion transmembrane import into cytosol	5/91	126/17913	0.000456088	0.00825148	0.00639307	6363/3932/11151/4283/6366	5
GO:0090022	regulation of neutrophil chemotaxis	3/91	30/17913	0.000466221	0.00834959	0.00646909	6363/5880/6366	3
GO:1990266	neutrophil migration	4/91	72/17913	0.00049252	0.00873238	0.00676567	6363/6288/5880/6366	4
GO:0070232	regulation of T cell apoptotic process	3/91	32/17913	0.000565404	0.00992536	0.00768996	939/6352/3575	3
GO:0006874	cellular calcium ion homeostasis	8/91	375/17913	0.000641292	0.0111472	0.0086366	6363/6288/3932/1043/6352/11151/4283/6366	8
GO:0051480	regulation of cytosolic calcium ion concentration	7/91	289/17913	0.000674173	0.0114341	0.00885889	6363/6288/3932/1043/11151/4283/6366	7
GO:0045730	respiratory burst	3/91	34/17913	0.000677145	0.0114341	0.00885889	3512/1043/5880	3
GO:1902622	regulation of neutrophil migration	3/91	34/17913	0.000677145	0.0114341	0.00885889	6363/5880/6366	3
GO:0045580	regulation of T cell differentiation	5/91	139/17913	0.00071309	0.0119274	0.00924113	6363/50943/914/939/3575	5
GO:0002690	positive regulation of leukocyte chemotaxis	4/91	81/17913	0.000769302	0.0127474	0.00987643	6363/6352/5880/6366	4
GO:0055074	calcium ion homeostasis	8/91	388/17913	0.000800463	0.0130462	0.0101079	6363/6288/3932/1043/6352/11151/4283/6366	8
GO:0006699	bile acid biosynthetic process	3/91	36/17913	0.000802051	0.0130462	0.0101079	1582/10998/1581	3
GO:1902107	positive regulation of leukocyte differentiation	5/91	143/17913	0.000810492	0.0130637	0.0101215	6363/50943/54997/939/3575	5
GO:0016042	lipid catabolic process	7/91	300/17913	0.000839463	0.0133477	0.0103416	51179/1581/6822/6696/1576/26279/5320	7
GO:0045582	positive regulation of T cell differentiation	4/91	83/17913	0.000843174	0.0133477	0.0103416	6363/50943/939/3575	4
GO:0072503	cellular divalent inorganic cation homeostasis	8/91	392/17913	0.000855376	0.0134182	0.0103961	6363/6288/3932/1043/6352/11151/4283/6366	8
GO:0060402	calcium ion transport into cytosol	5/91	145/17913	0.000862759	0.0134182	0.0103961	6363/3932/11151/4283/6366	5
GO:0019216	regulation of lipid metabolic process	8/91	402/17913	0.00100601	0.0155101	0.0120169	6363/23541/5244/7069/345275/1581/6822/6366	8
GO:0072376	protein activation cascade	5/91	151/17913	0.0010347	0.0158148	0.012253	2158/462/712/713/714	5
GO:0015850	organic hydroxy compound transport	6/91	228/17913	0.00107841	0.016342	0.0126615	5244/6554/10998/200931/6580/6696	6
GO:0032103	positive regulation of response to external stimulus	7/91	315/17913	0.00111482	0.0163906	0.0126991	6363/6352/115362/712/5880/6366/5320	7
GO:0001768	establishment of T cell polarity	2/91	10/17913	0.00111859	0.0163906	0.0126991	6363/6366	2
GO:0002645	positive regulation of tolerance induction	2/91	10/17913	0.00111859	0.0163906	0.0126991	50943/916	2
GO:0002664	regulation of T cell tolerance induction	2/91	10/17913	0.00111859	0.0163906	0.0126991	50943/916	2
GO:0015908	fatty acid transport	4/91	90/17913	0.00114121	0.016585	0.0128497	84879/7069/26279/5320	4
GO:0072507	divalent inorganic cation homeostasis	8/91	412/17913	0.00117724	0.0169695	0.0131476	6363/6288/3932/1043/6352/11151/4283/6366	8
GO:0060401	cytosolic calcium ion transport	5/91	157/17913	0.00123088	0.0175071	0.0135641	6363/3932/11151/4283/6366	5
GO:0048247	lymphocyte chemotaxis	3/91	42/17913	0.00126153	0.0175071	0.0135641	6288/6352/6366	3
GO:0045621	positive regulation of lymphocyte differentiation	4/91	93/17913	0.00128905	0.0175071	0.0135641	6363/50943/939/3575	4
GO:0001767	establishment of lymphocyte polarity	2/91	11/17913	0.00136265	0.0175071	0.0135641	6363/6366	2
GO:0002604	regulation of dendritic cell antigen processing and presentation	2/91	11/17913	0.00136265	0.0175071	0.0135641	6363/6366	2
GO:0006558	L-phenylalanine metabolic process	2/91	11/17913	0.00136265	0.0175071	0.0135641	3242/6898	2
GO:0006559	L-phenylalanine catabolic process	2/91	11/17913	0.00136265	0.0175071	0.0135641	3242/6898	2
GO:0015697	quaternary ammonium group transport	2/91	11/17913	0.00136265	0.0175071	0.0135641	283600/6580	2
GO:0032908	regulation of transforming growth factor beta1 production	2/91	11/17913	0.00136265	0.0175071	0.0135641	50943/4060	2
GO:0033089	positive regulation of T cell differentiation in thymus	2/91	11/17913	0.00136265	0.0175071	0.0135641	50943/3575	2
GO:0033632	regulation of cell-cell adhesion mediated by integrin	2/91	11/17913	0.00136265	0.0175071	0.0135641	916/6352	2
GO:0097048	dendritic cell apoptotic process	2/91	11/17913	0.00136265	0.0175071	0.0135641	6363/6366	2
GO:1902221	erythrose 4-phosphate/phosphoenolpyruvate family amino acid metabolic process	2/91	11/17913	0.00136265	0.0175071	0.0135641	3242/6898	2
GO:1902222	erythrose 4-phosphate/phosphoenolpyruvate family amino acid catabolic process	2/91	11/17913	0.00136265	0.0175071	0.0135641	3242/6898	2
GO:2000668	regulation of dendritic cell apoptotic process	2/91	11/17913	0.00136265	0.0175071	0.0135641	6363/6366	2
GO:1901617	organic hydroxy compound biosynthetic process	6/91	241/17913	0.00143241	0.018271	0.014156	1610/23541/1582/10998/1581/1576	6
GO:0046394	carboxylic acid biosynthetic process	8/91	426/17913	0.00145533	0.0184307	0.0142798	2645/1582/5207/10998/1558/1581/1576/5730	8
GO:0016053	organic acid biosynthetic process	8/91	427/17913	0.00147704	0.018573	0.01439	2645/1582/5207/10998/1558/1581/1576/5730	8
GO:0045619	regulation of lymphocyte differentiation	5/91	164/17913	0.00149312	0.018643	0.0144442	6363/50943/914/939/3575	5
GO:0045058	T cell selection	3/91	45/17913	0.00154229	0.0191223	0.0148155	50943/916/915	3
GO:0002377	immunoglobulin production	4/91	98/17913	0.0015644	0.0192616	0.0149235	50943/3575/3119/51237	4
GO:0002468	dendritic cell antigen processing and presentation	2/91	12/17913	0.00162978	0.0195243	0.0151271	6363/6366	2
GO:0002517	T cell tolerance induction	2/91	12/17913	0.00162978	0.0195243	0.0151271	50943/916	2
GO:0032905	transforming growth factor beta1 production	2/91	12/17913	0.00162978	0.0195243	0.0151271	50943/4060	2
GO:0072488	ammonium transmembrane transport	2/91	12/17913	0.00162978	0.0195243	0.0151271	283600/6580	2
GO:0070231	T cell apoptotic process	3/91	46/17913	0.00164387	0.0195609	0.0151554	939/6352/3575	3
GO:0006631	fatty acid metabolic process	7/91	339/17913	0.00169823	0.020073	0.0155522	51179/10998/1558/1581/2938/1576/5730	7
GO:0097529	myeloid leukocyte migration	5/91	170/17913	0.00174885	0.0205345	0.0159097	6363/6288/6352/5880/6366	5
GO:0002697	regulation of immune effector process	8/91	441/17913	0.00180891	0.0211	0.0163478	6363/50943/712/3575/713/5880/714/51237	8
GO:0060326	cell chemotaxis	6/91	253/17913	0.00183224	0.0212325	0.0164505	6363/6288/6352/11151/5880/6366	6
GO:0070989	oxidative demethylation	2/91	13/17913	0.00191975	0.022102	0.0171242	1558/1576	2
GO:0002455	humoral immune response mediated by circulating immunoglobulin	4/91	104/17913	0.0019459	0.0222586	0.0172455	712/3119/713/714	4
GO:0002688	regulation of leukocyte chemotaxis	4/91	105/17913	0.0020152	0.0229036	0.0177452	6363/6352/5880/6366	4
GO:0006575	cellular modified amino acid metabolic process	5/91	179/17913	0.00219085	0.0245832	0.0190466	8424/2939/2938/26279/5320	5
GO:0070228	regulation of lymphocyte apoptotic process	3/91	51/17913	0.00221431	0.0245832	0.0190466	939/6352/3575	3
GO:0150077	regulation of neuroinflammatory response	3/91	51/17913	0.00221431	0.0245832	0.0190466	8530/712/4318	3
GO:0001771	immunological synapse formation	2/91	14/17913	0.00223232	0.0245832	0.0190466	6363/6366	2
GO:0010820	positive regulation of T cell chemotaxis	2/91	14/17913	0.00223232	0.0245832	0.0190466	6352/6366	2
GO:1903708	positive regulation of hemopoiesis	5/91	182/17913	0.00235482	0.0257721	0.0199677	6363/50943/54997/939/3575	5
GO:0006805	xenobiotic metabolic process	4/91	110/17913	0.00238748	0.0259693	0.0201205	1555/1558/10249/1576	4
GO:0010819	regulation of T cell chemotaxis	2/91	15/17913	0.00256726	0.0273923	0.021223	6352/6366	2
GO:0030852	regulation of granulocyte differentiation	2/91	15/17913	0.00256726	0.0273923	0.021223	54997/714	2
GO:1901741	positive regulation of myoblast fusion	2/91	15/17913	0.00256726	0.0273923	0.021223	963/4283	2
GO:0006875	cellular metal ion homeostasis	8/91	467/17913	0.0025801	0.0273923	0.021223	6363/6288/3932/1043/6352/11151/4283/6366	8
GO:0046717	acid secretion	4/91	113/17913	0.00263221	0.0277792	0.0215227	5244/200931/26279/5320	4
GO:0006959	humoral immune response	6/91	276/17913	0.00282923	0.0295742	0.0229135	3512/712/3119/713/714/5320	6
GO:0006694	steroid biosynthetic process	5/91	190/17913	0.00283566	0.0295742	0.0229135	23541/1582/10998/1581/1576	5
GO:0033631	cell-cell adhesion mediated by integrin	2/91	16/17913	0.00292434	0.0299702	0.0232203	916/6352	2
GO:0036149	phosphatidylinositol acyl-chain remodeling	2/91	16/17913	0.00292434	0.0299702	0.0232203	26279/5320	2
GO:0060263	regulation of respiratory burst	2/91	16/17913	0.00292434	0.0299702	0.0232203	3512/5880	2
GO:0034754	cellular hormone metabolic process	4/91	117/17913	0.00298459	0.0302381	0.0234279	7276/8608/6696/1576	4
GO:2000257	regulation of protein activation cascade	4/91	117/17913	0.00298459	0.0302381	0.0234279	462/712/713/714	4
GO:0097164	ammonium ion metabolic process	5/91	193/17913	0.00303309	0.0305549	0.0236733	84879/1610/8424/26279/5320	5
GO:0002643	regulation of tolerance induction	2/91	17/17913	0.00330333	0.0329033	0.0254928	50943/916	2
GO:0048535	lymph node development	2/91	17/17913	0.00330333	0.0329033	0.0254928	3575/4050	2
GO:0002687	positive regulation of leukocyte migration	4/91	121/17913	0.00336796	0.0333597	0.0258464	6363/6352/5880/6366	4
GO:0050701	interleukin-1 secretion	3/91	60/17913	0.00352095	0.0345996	0.0268071	6363/6288/115362	3
GO:1901605	alpha-amino acid metabolic process	5/91	200/17913	0.00353217	0.0345996	0.0268071	1610/92292/10249/3242/6898	5
GO:0046635	positive regulation of alpha-beta T cell activation	3/91	61/17913	0.00368958	0.0354983	0.0275034	6363/50943/916	3
GO:0007597	blood coagulation, intrinsic pathway	2/91	18/17913	0.003704	0.0354983	0.0275034	2158/462	2
GO:0036148	phosphatidylglycerol acyl-chain remodeling	2/91	18/17913	0.003704	0.0354983	0.0275034	26279/5320	2
GO:1901739	regulation of myoblast fusion	2/91	18/17913	0.003704	0.0354983	0.0275034	963/4283	2
GO:0030101	natural killer cell activation	3/91	63/17913	0.00404146	0.0381023	0.0295209	914/11151/57823	3
GO:0002544	chronic inflammatory response	2/91	19/17913	0.00412613	0.0381023	0.0295209	50943/6352	2
GO:0002577	regulation of antigen processing and presentation	2/91	19/17913	0.00412613	0.0381023	0.0295209	6363/6366	2
GO:0002710	negative regulation of T cell mediated immunity	2/91	19/17913	0.00412613	0.0381023	0.0295209	50943/3575	2
GO:0045061	thymic T cell selection	2/91	19/17913	0.00412613	0.0381023	0.0295209	916/915	2
GO:0045076	regulation of interleukin-2 biosynthetic process	2/91	19/17913	0.00412613	0.0381023	0.0295209	50943/916	2
GO:0140131	positive regulation of lymphocyte chemotaxis	2/91	19/17913	0.00412613	0.0381023	0.0295209	6352/6366	2
GO:0015909	long-chain fatty acid transport	3/91	64/17913	0.00422479	0.0388112	0.0300701	7069/26279/5320	3
GO:0050921	positive regulation of chemotaxis	4/91	130/17913	0.00435042	0.0397593	0.0308047	6363/6352/5880/6366	4
GO:0044282	small molecule catabolic process	7/91	404/17913	0.00449488	0.0408688	0.0316643	2645/1610/51179/1581/6822/3242/6898	7
GO:0010560	positive regulation of glycoprotein biosynthetic process	2/91	20/17913	0.0045695	0.0411255	0.0318632	6363/6366	2
GO:0071636	positive regulation of transforming growth factor beta production	2/91	20/17913	0.0045695	0.0411255	0.0318632	50943/4060	2
GO:0046631	alpha-beta T cell activation	4/91	133/17913	0.00471665	0.0422355	0.0327232	6363/50943/916/26279	4
GO:0042113	B cell activation	5/91	215/17913	0.00479643	0.0423829	0.0328374	50943/939/3575/973/51237	5
GO:0050918	positive chemotaxis	3/91	67/17913	0.00480483	0.0423829	0.0328374	6288/6352/11151	3
GO:0070227	lymphocyte apoptotic process	3/91	67/17913	0.00480483	0.0423829	0.0328374	939/6352/3575	3
GO:0009064	glutamine family amino acid metabolic process	3/91	68/17913	0.00500832	0.0439591	0.0340586	1610/92292/6898	3
GO:0036150	phosphatidylserine acyl-chain remodeling	2/91	21/17913	0.00503389	0.0439659	0.0340639	26279/5320	2
GO:0006816	calcium ion transport	7/91	415/17913	0.00519485	0.0451201	0.0349581	6363/2645/3932/6352/11151/4283/6366	7
GO:0009988	cell-cell recognition	3/91	69/17913	0.00521693	0.0451201	0.0349581	6363/26998/6366	3
GO:0002526	acute inflammatory response	5/91	220/17913	0.00528135	0.0454555	0.035218	6288/462/712/713/714	5
GO:0034695	response to prostaglandin E	2/91	22/17913	0.00551906	0.0463758	0.035931	6363/6366	2
GO:0042094	interleukin-2 biosynthetic process	2/91	22/17913	0.00551906	0.0463758	0.035931	50943/916	2
GO:0046835	carbohydrate phosphorylation	2/91	22/17913	0.00551906	0.0463758	0.035931	2645/5207	2
GO:1901685	glutathione derivative metabolic process	2/91	22/17913	0.00551906	0.0463758	0.035931	2939/2938	2
GO:1901687	glutathione derivative biosynthetic process	2/91	22/17913	0.00551906	0.0463758	0.035931	2939/2938	2
GO:0042100	B cell proliferation	3/91	71/17913	0.00564971	0.0472497	0.0366081	3575/973/51237	3
GO:0032753	positive regulation of interleukin-4 production	2/91	23/17913	0.00602481	0.0499159	0.0386738	50943/916	2
GO:0060143	positive regulation of syncytium formation by plasma membrane fusion	2/91	23/17913	0.00602481	0.0499159	0.0386738	963/4283	2
GO:0042613	MHC class II protein complex	6/94	16/18678	1.06e-10	1.51e-08	9.4e-09	3115/3119/3117/3123/3113/3122	6
GO:0042611	MHC protein complex	6/94	25/18678	2.27e-09	1.61e-07	1e-07	3115/3119/3117/3123/3113/3122	6
GO:0071556	integral component of lumenal side of endoplasmic reticulum membrane	6/94	29/18678	5.98e-09	2.12e-07	1.32e-07	3115/3119/3117/3123/3113/3122	6
GO:0098553	lumenal side of endoplasmic reticulum membrane	6/94	29/18678	5.98e-09	2.12e-07	1.32e-07	3115/3119/3117/3123/3113/3122	6
GO:0098552	side of membrane	13/94	359/18678	2.91e-08	8.28e-07	5.15e-07	916/914/925/3115/3575/3119/973/3117/3123/3113/3122/3561/4283	13
GO:0030669	clathrin-coated endocytic vesicle membrane	6/94	40/18678	4.62e-08	1.09e-06	6.81e-07	3115/3119/3117/3123/3113/3122	6
GO:0030665	clathrin-coated vesicle membrane	8/94	110/18678	8.18e-08	1.66e-06	1.03e-06	915/3115/3575/3119/3117/3123/3113/3122	8
GO:0012507	ER to Golgi transport vesicle membrane	6/94	55/18678	3.29e-07	5.35e-06	3.33e-06	3115/3119/3117/3123/3113/3122	6
GO:0030136	clathrin-coated vesicle	9/94	182/18678	3.39e-07	5.35e-06	3.33e-06	5244/915/3115/3575/3119/3117/3123/3113/3122	9
GO:0045334	clathrin-coated endocytic vesicle	6/94	59/18678	5.02e-07	7.14e-06	4.44e-06	3115/3119/3117/3123/3113/3122	6
GO:0001772	immunological synapse	5/94	36/18678	9.66e-07	1.25e-05	7.77e-06	916/3932/3001/11151/963	5
GO:0030134	COPII-coated ER to Golgi transport vesicle	6/94	69/18678	1.28e-06	1.52e-05	9.46e-06	3115/3119/3117/3123/3113/3122	6
GO:0030666	endocytic vesicle membrane	8/94	161/18678	1.52e-06	1.66e-05	1.03e-05	11151/3115/3119/3117/5880/3123/3113/3122	8
GO:0030662	coated vesicle membrane	8/94	169/18678	2.19e-06	2.22e-05	1.38e-05	915/3115/3575/3119/3117/3123/3113/3122	8
GO:0030176	integral component of endoplasmic reticulum membrane	7/94	125/18678	3.21e-06	3.04e-05	1.89e-05	10998/3115/3119/3117/3123/3113/3122	7
GO:0031227	intrinsic component of endoplasmic reticulum membrane	7/94	131/18678	4.38e-06	3.67e-05	2.28e-05	10998/3115/3119/3117/3123/3113/3122	7
GO:0032588	trans-Golgi network membrane	6/94	85/18678	4.39e-06	3.67e-05	2.28e-05	3115/3119/3117/3123/3113/3122	6
GO:0030135	coated vesicle	9/94	261/18678	6.69e-06	5.28e-05	3.28e-05	5244/915/3115/3575/3119/3117/3123/3113/3122	9
GO:0030660	Golgi-associated vesicle membrane	6/94	102/18678	1.26e-05	9.44e-05	5.88e-05	3115/3119/3117/3123/3113/3122	6
GO:0030139	endocytic vesicle	9/94	289/18678	1.51e-05	0.000107346	6.68e-05	6288/11151/3115/3119/3117/5880/3123/3113/3122	9
GO:0009897	external side of plasma membrane	7/94	199/18678	6.56e-05	0.000443637	0.000276245	916/914/925/3575/973/3561/4283	7
GO:0042101	T cell receptor complex	3/94	17/18678	7.98e-05	0.000514778	0.000320544	916/925/915	3
GO:0098797	plasma membrane protein complex	10/94	451/18678	9.02e-05	0.000542288	0.000337674	916/925/915/3115/3119/973/3117/3123/3113/3122	10
GO:0005798	Golgi-associated vesicle	6/94	145/18678	9.17e-05	0.000542288	0.000337674	3115/3119/3117/3123/3113/3122	6
GO:0034364	high-density lipoprotein particle	3/94	26/18678	0.000295094	0.00167614	0.0010437	6288/3250/319	3
GO:0030658	transport vesicle membrane	6/94	188/18678	0.000375276	0.00204958	0.00127624	3115/3119/3117/3123/3113/3122	6
GO:0005802	trans-Golgi network	6/94	196/18678	0.000468206	0.00246242	0.00153331	3115/3119/3117/3123/3113/3122	6
GO:0016323	basolateral plasma membrane	6/94	201/18678	0.000534819	0.0027123	0.0016889	6554/10998/200931/10864/6580/4072	6
GO:0034358	plasma lipoprotein particle	3/94	37/18678	0.000847262	0.00401038	0.00249719	6288/3250/319	3
GO:1990777	lipoprotein particle	3/94	37/18678	0.000847262	0.00401038	0.00249719	6288/3250/319	3
GO:0072562	blood microparticle	5/94	147/18678	0.000882393	0.00401051	0.00249728	3512/3250/462/713/714	5
GO:0062023	collagen-containing extracellular matrix	8/94	399/18678	0.000908301	0.00401051	0.00249728	2158/462/712/713/714/4318/2202/4060	8
GO:0005581	collagen trimer	4/94	86/18678	0.000932021	0.00401051	0.00249728	712/713/714/4060	4
GO:0032994	protein-lipid complex	3/94	39/18678	0.000989323	0.00413188	0.00257285	6288/3250/319	3
GO:0031012	extracellular matrix	8/94	468/18678	0.00248157	0.0100681	0.00626922	2158/462/712/713/714/4318/2202/4060	8
GO:0045121	membrane raft	6/94	309/18678	0.00470676	0.018347	0.0114244	5244/3932/962/914/925/973	6
GO:0098857	membrane microdomain	6/94	310/18678	0.00478056	0.018347	0.0114244	5244/3932/962/914/925/973	6
GO:0098589	membrane region	6/94	321/18678	0.00564986	0.0211126	0.0131465	5244/3932/962/914/925/973	6
GO:0098802	plasma membrane receptor complex	4/94	153/18678	0.00746429	0.0271325	0.016895	916/925/915/973	4
GO:0005765	lysosomal membrane	6/94	344/18678	0.00783404	0.0271325	0.016895	3115/3119/3117/3123/3113/3122	6
GO:0098852	lytic vacuole membrane	6/94	344/18678	0.00783404	0.0271325	0.016895	3115/3119/3117/3123/3113/3122	6
GO:0030133	transport vesicle	6/94	349/18678	0.00837974	0.0283315	0.0176416	3115/3119/3117/3123/3113/3122	6
GO:0005774	vacuolar membrane	6/94	382/18678	0.0126881	0.0419003	0.0260906	3115/3119/3117/3123/3113/3122	6
GO:0044438	microbody part	3/94	98/18678	0.0133054	0.0419858	0.0261439	252995/1610/51179	3
GO:0044439	peroxisomal part	3/94	98/18678	0.0133054	0.0419858	0.0261439	252995/1610/51179	3
GO:0042605	peptide antigen binding	6/90	30/16969	1.01e-08	2.48e-06	1.9e-06	3115/3119/3117/3123/3113/3122	6
GO:0005506	iron ion binding	9/90	144/16969	6.99e-08	8.15e-06	6.25e-06	1549/1582/1548/284541/8424/1555/1558/1581/1576	9
GO:0003823	antigen binding	9/90	150/16969	9.95e-08	8.15e-06	6.25e-06	3512/962/3115/3575/3119/3117/3123/3113/3122	9
GO:0032395	MHC class II receptor activity	4/90	10/16969	1.52e-07	9.33e-06	7.14e-06	3119/3117/3113/3122	4
GO:0004497	monooxygenase activity	7/90	86/16969	3.56e-07	1.75e-05	1.34e-05	1549/1548/284541/1555/1558/1581/1576	7
GO:0016705	oxidoreductase activity, acting on paired donors, with incorporation or reduction of molecular oxygen	7/90	137/16969	8.2e-06	0.000336174	0.000257489	1549/1548/284541/8424/1558/1581/1576	7
GO:0008009	chemokine activity	4/90	30/16969	1.82e-05	0.000641231	0.000491144	6363/6352/4283/6366	4
GO:0042379	chemokine receptor binding	4/90	47/16969	0.000110862	0.003409	0.00261109	6363/6352/4283/6366	4
GO:0008395	steroid hydroxylase activity	3/90	19/16969	0.000131466	0.00358688	0.00274733	1558/1581/1576	3
GO:0042277	peptide binding	7/90	215/16969	0.000145808	0.00358688	0.00274733	712/3115/3119/3117/3123/3113/3122	7
GO:0005125	cytokine activity	6/90	154/16969	0.000168429	0.00376668	0.00288505	6363/6696/6352/4050/4283/6366	6
GO:0005319	lipid transporter activity	5/90	103/16969	0.000218208	0.00417552	0.00319819	84879/5244/6554/200931/319	5
GO:0016712	oxidoreductase activity, acting on paired donors, with incorporation or reduction of molecular oxygen, reduced flavin or flavoprotein as one donor, and incorporation of one atom of oxygen	3/90	23/16969	0.000236614	0.00417552	0.00319819	1549/1558/1576	3
GO:0020037	heme binding	5/90	106/16969	0.000249478	0.00417552	0.00319819	1548/284541/1555/1581/1576	5
GO:0048018	receptor ligand activity	9/90	397/16969	0.000254605	0.00417552	0.00319819	6363/252995/7276/6696/6352/4050/4283/6366/2202	9
GO:0023023	MHC protein complex binding	3/90	25/16969	0.000304942	0.00468848	0.00359109	925/3123/3122	3
GO:0008028	monocarboxylic acid transmembrane transporter activity	3/90	26/16969	0.000343397	0.00469309	0.00359462	84879/6554/200931	3
GO:0048020	CCR chemokine receptor binding	3/90	26/16969	0.000343397	0.00469309	0.00359462	6363/6352/6366	3
GO:0046906	tetrapyrrole binding	5/90	116/16969	0.000378789	0.00473357	0.00362563	1548/284541/1555/1581/1576	5
GO:0019825	oxygen binding	3/90	27/16969	0.000384843	0.00473357	0.00362563	1549/1582/1576	3
GO:0030545	receptor regulator activity	9/90	425/16969	0.00041924	0.0049111	0.00376161	6363/252995/7276/6696/6352/4050/4283/6366/2202	9
GO:0033218	amide binding	7/90	266/16969	0.000530473	0.00593166	0.00454329	712/3115/3119/3117/3123/3113/3122	7
GO:1901618	organic hydroxy compound transmembrane transporter activity	3/90	36/16969	0.00090758	0.00970717	0.0074351	6554/200931/6580	3
GO:0015125	bile acid transmembrane transporter activity	2/90	12/16969	0.00177367	0.0174856	0.0133929	6554/200931	2
GO:0022804	active transmembrane transporter activity	6/90	241/16969	0.00177699	0.0174856	0.0133929	84879/9154/5244/6554/10864/6580	6
GO:0015291	secondary active transmembrane transporter activity	5/90	172/16969	0.00221593	0.0209661	0.0160588	84879/9154/6554/10864/6580	5
GO:0004869	cysteine-type endopeptidase inhibitor activity	3/90	53/16969	0.00279054	0.0254249	0.0194739	26998/8530/939	3
GO:0015293	symporter activity	4/90	112/16969	0.00297175	0.0261089	0.0199978	84879/9154/6554/6580	4
GO:0023026	MHC class II protein complex binding	2/90	16/16969	0.00318069	0.026769	0.0205034	3123/3122	2
GO:0015370	solute:sodium symporter activity	3/90	56/16969	0.00326451	0.026769	0.0205034	9154/6554/6580	3
GO:0001664	G protein-coupled receptor binding	5/90	205/16969	0.00469618	0.0364369	0.0279085	6363/6288/6352/4283/6366	5
GO:0019200	carbohydrate kinase activity	2/90	20/16969	0.00496721	0.0364369	0.0279085	2645/5207	2
GO:0005126	cytokine receptor binding	5/90	210/16969	0.00519577	0.0364369	0.0279085	6363/6352/4050/4283/6366	5
GO:0070330	aromatase activity	2/90	21/16969	0.00547123	0.0364369	0.0279085	1549/1558	2
GO:0102567	phospholipase A2 activity (consuming 1,2-dipalmitoylphosphatidylcholine)	2/90	21/16969	0.00547123	0.0364369	0.0279085	26279/5320	2
GO:0102568	phospholipase A2 activity consuming 1,2-dioleoylphosphatidylethanolamine)	2/90	21/16969	0.00547123	0.0364369	0.0279085	26279/5320	2
GO:0004252	serine-type endopeptidase activity	4/90	133/16969	0.00548035	0.0364369	0.0279085	2158/3001/3003/4318	4
GO:0004364	glutathione transferase activity	2/90	22/16969	0.0059977	0.0385547	0.0295305	2939/2938	2
GO:0015294	solute:cation symporter activity	3/90	70/16969	0.00611233	0.0385547	0.0295305	9154/6554/6580	3
GO:0008514	organic anion transmembrane transporter activity	4/90	139/16969	0.00639614	0.0393363	0.0301292	84879/6554/200931/10864	4
GO:0004866	endopeptidase inhibitor activity	4/90	149/16969	0.00813889	0.0487501	0.0373396	26998/462/8530/939	4
GO:0016405	CoA-ligase activity	2/90	26/16969	0.00832319	0.0487501	0.0373396	10998/123876	2
GO:0048037	cofactor binding	7/90	438/16969	0.00865183	0.0494965	0.0379113	1610/1548/284541/1555/1581/6898/1576	7
GO:0008509	anion transmembrane transporter activity	5/90	240/16969	0.00900999	0.0498372	0.0381722	84879/6554/200931/10864/6580	5
GO:0061135	endopeptidase regulator activity	4/90	154/16969	0.00911655	0.0498372	0.0381722	26998/462/8530/939	4

[truncated: 2 more sheets: S11, S12]
